# Supplementary material
Source: PubMed Central journal article supplement (PMC9130996)
Supplement: 253_2022_11988_MOESM1_ESM.pdf [file 253_2022_11988_MOESM1_ESM.pdf]

## Applied Microbiology and Biotechnology

### Supplementary materials for-

**A conserved subunit vaccine designed against SARS-CoV-2 variants showed evidence in neutralizing the virus.**

*K. M. Kaderi Kibria\**, *Md. Omar Faruque<sup>‡</sup>*, *Md. Shaid bin Islam<sup>‡</sup>*, *Hedayet Ullah<sup>‡</sup>*, *Shafi Mahmud*, *Mojnu Miah*, and *Amani Ali Saleh*

#### **K. M. Kaderi Kibria\***

*Department of Biotechnology and Genetic Engineering, Faculty of Life Science, Mawlana Bhashani Science and Technology University, Tangail-1902, Bangladesh. Email: [km\\_kibria@yahoo.com](mailto:km_kibria@yahoo.com)*

#### **Md. Omar Faruque**

*Department of Biotechnology and Genetic Engineering, Faculty of Life Science, Mawlana Bhashani Science and Technology University, Tangail-1902, Bangladesh. Email:*

#### **Md. Shaid bin Islam**

*Department of Biotechnology and Genetic Engineering, Faculty of Life Science, Mawlana Bhashani Science and Technology University, Tangail-1902, Bangladesh. Email: [shaidbin@gmail.com](mailto:shaidbin@gmail.com)*

#### **Hedayet Ullah**

*Department of Biotechnology and Genetic Engineering, Faculty of Life Science, Mawlana Bhashani Science and Technology University, Tangail-1902, Bangladesh. Email: [tokibge@gmail.com](mailto:tokibge@gmail.com)*

#### **Shafi Mahmud**

*Department of Genetic Engineering and Biotechnology, University of Rajshahi, Rajshahi, Bangladesh. Email: [shafimahmudfz@gmail.com](mailto:shafimahmudfz@gmail.com)*

#### **Mojnu Miah**

*Infectious Diseases Division, International Centre for Diarrheal Diseases Research, Bangladesh (icddr,b), Bangladesh. Email: [mojnumiah.bge@gmail.com](mailto:mojnumiah.bge@gmail.com)*

#### **Amani Ali Saleh**

*Virology Department, Veterinary Serum and Vaccine Research Institute (VSVRI), Cairo, Egypt. Email: [Dr.Amani-Ali@hotmail.com](mailto:Dr.Amani-Ali@hotmail.com)*

<sup>‡</sup>These authors contributed equally.

#### **\*Corresponding Author:**

K. M. Kaderi Kibria, PhD

Associate Professor, Department of Biotechnology and Genetic Engineering,  
Mawlana Bhashani Science and Technology University, Tangail, Bangladesh

E-mail: [km\\_kibria@yahoo.com](mailto:km_kibria@yahoo.com)

Mobile No: +8801816819466

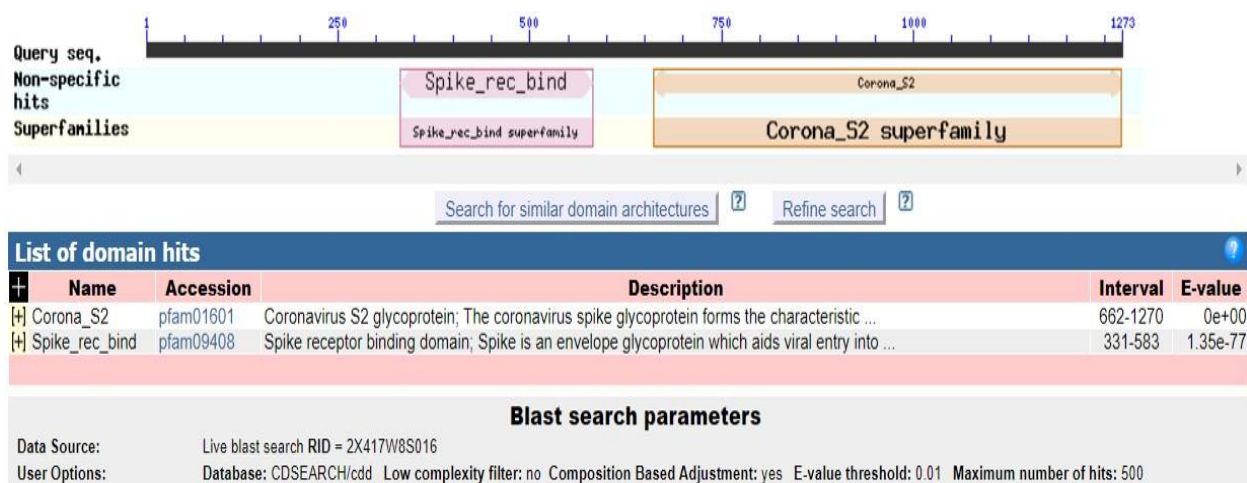

**Fig S1:** CDD search to find the major domains of Spike surface glycoprotein. Two distinct domains are observed in this protein e.g. S2 glycoprotein and Spike receptor binding domain (S1).

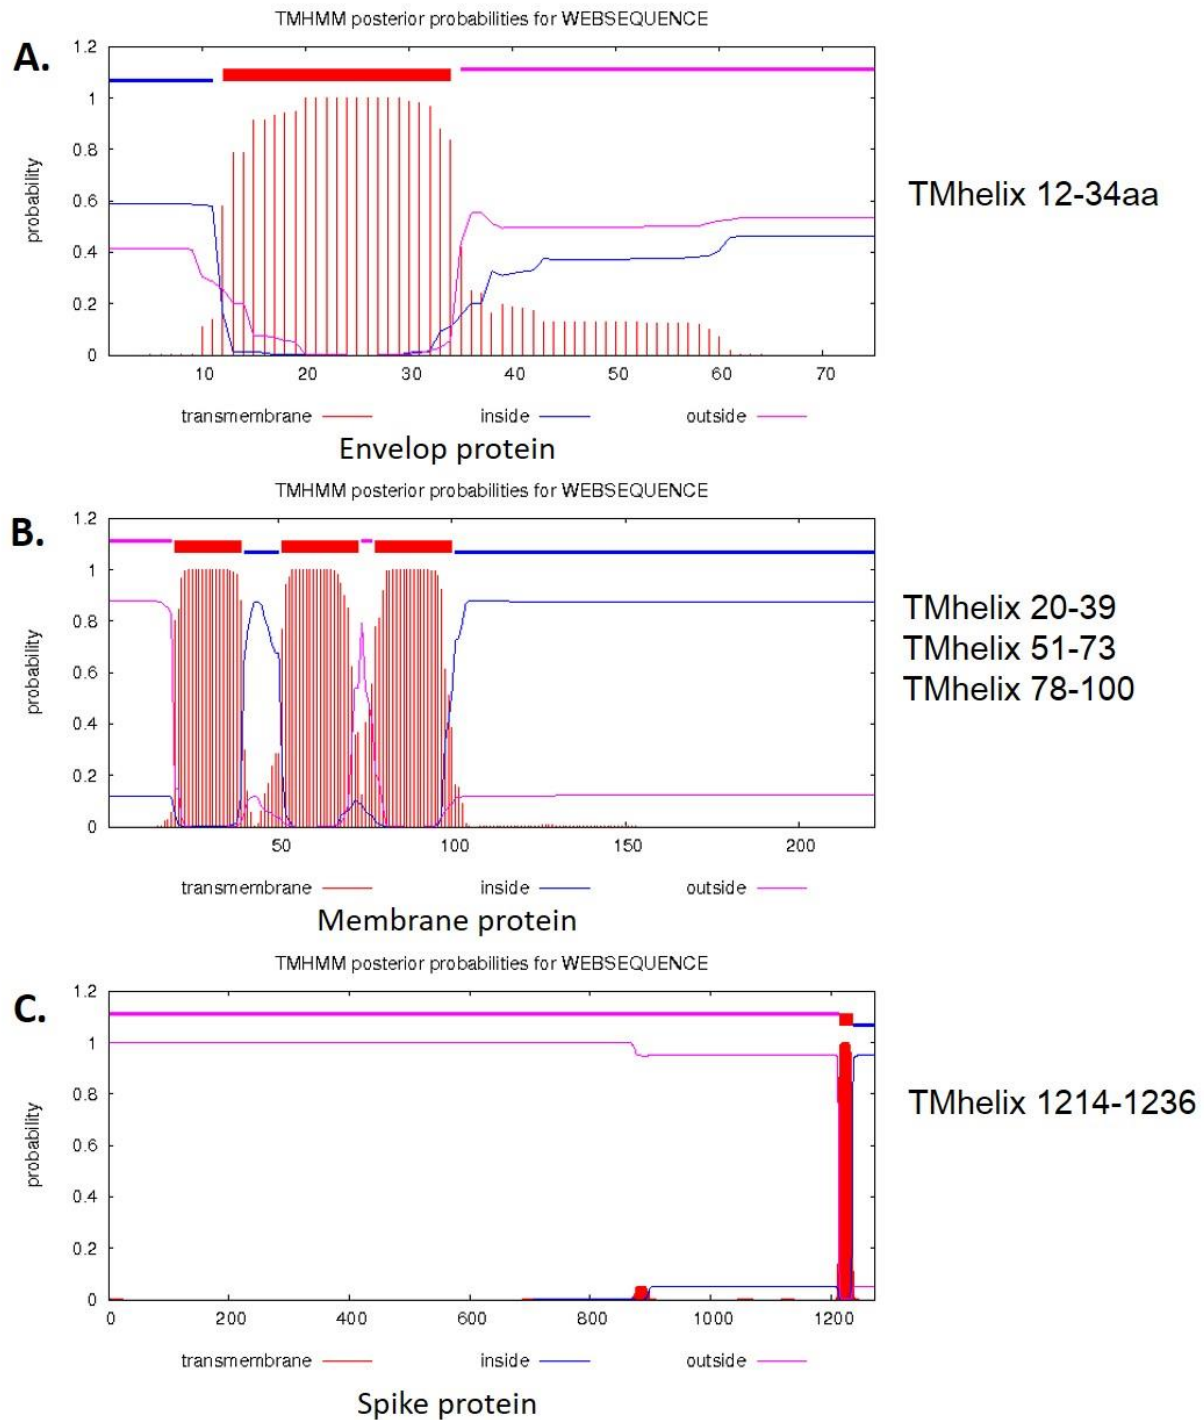

**Fig S2:** The transmembrane region prediction of selected (A) Envelope protein, (B) Membrane glycoprotein and (C) Spike surface glycoprotein by TMHMM.

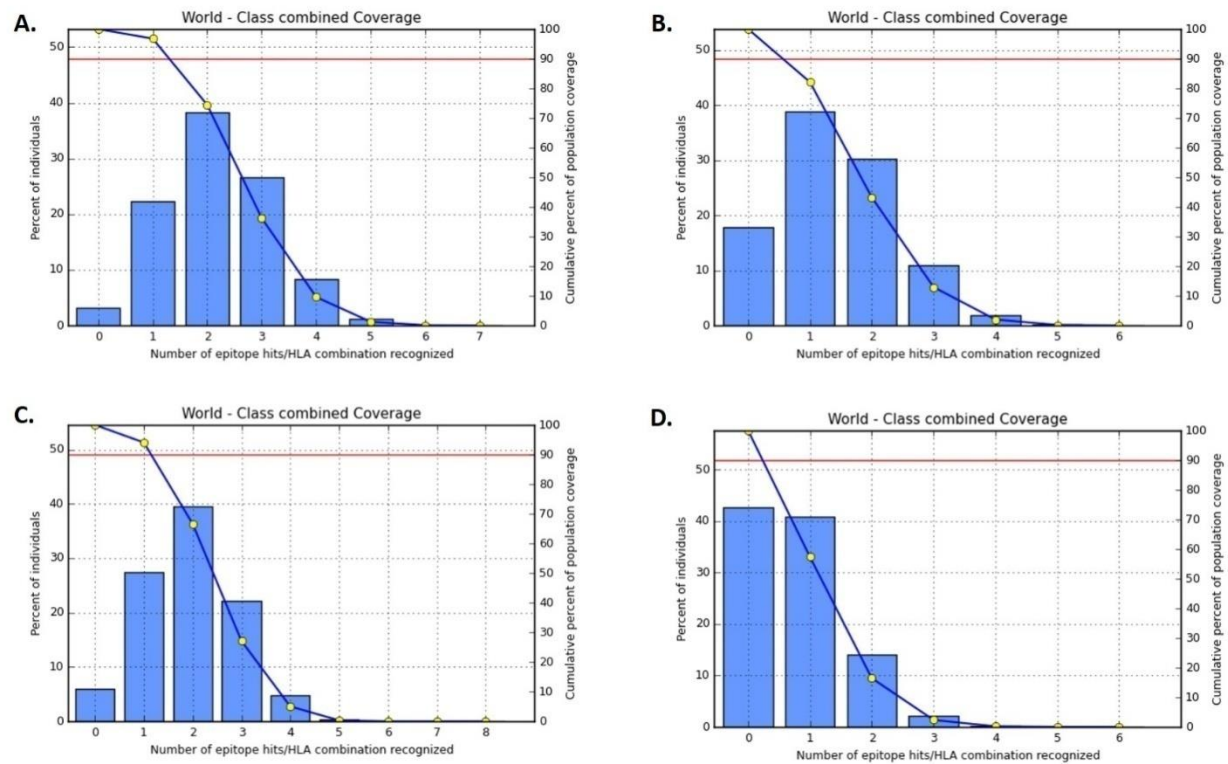

**Fig S3:** Population coverage analysis for four prominent epitopes on the basis of HLA interaction in the whole world. **(A)** The population coverage for epitope CVEnvA2 (96.77%), **(B)** The population coverage for epitope CVMemB2 (82.11%), **(C)** The population coverage for epitope CVS1A2 (94.07%), **(D)** The population coverage for epitope CVS2B2 (57.36%). The figures were prepared depending on the combined score of both MHC class I and MHC class II interaction. Notes: the line (-o-) in the graphs, points out the cumulative percentage of population coverage of the epitopes; the bars indicate the population coverage for each epitope.

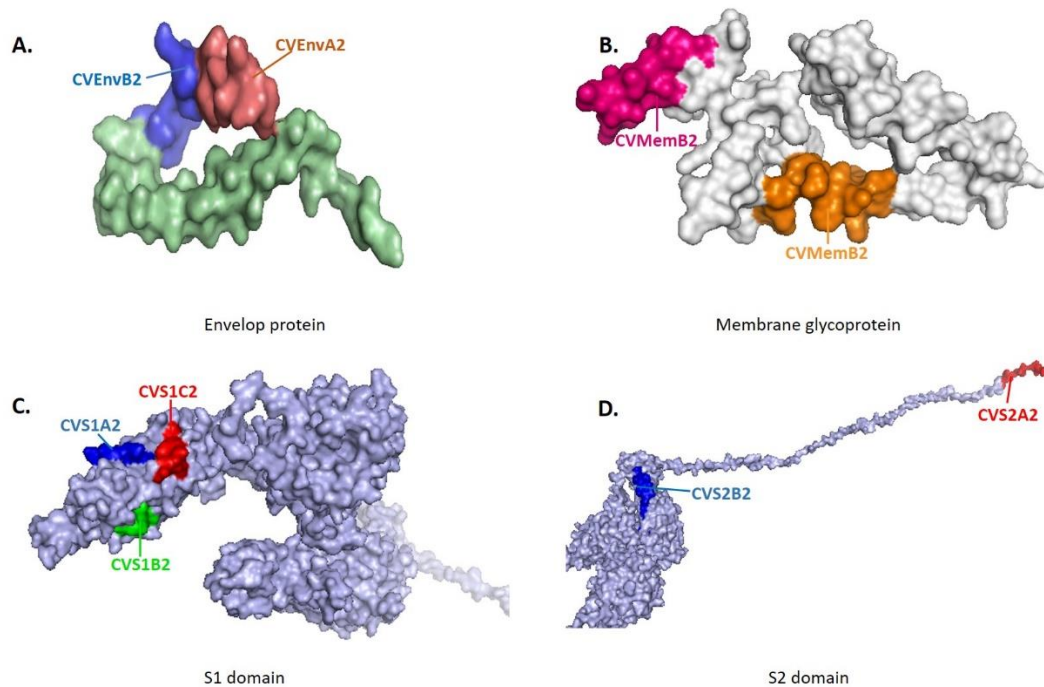

**Fig S4:** The 3D models of the Envelope protein (A), Membrane glycoprotein (B) and Surface glycoprotein (C and D). The surface location of the T-cell epitopes on the protein, A. CVEnvA2 (light red) and CVEnvB2 (Light Blue), B. CVMemA2 (Orange) and CVMemB2 (Pink), C. CVS1A2 (Blue), CVS1B2 (Green) and CVS1C2 (Red) and D. CVS2A2 (Red) and CVS2B2 (Blue).

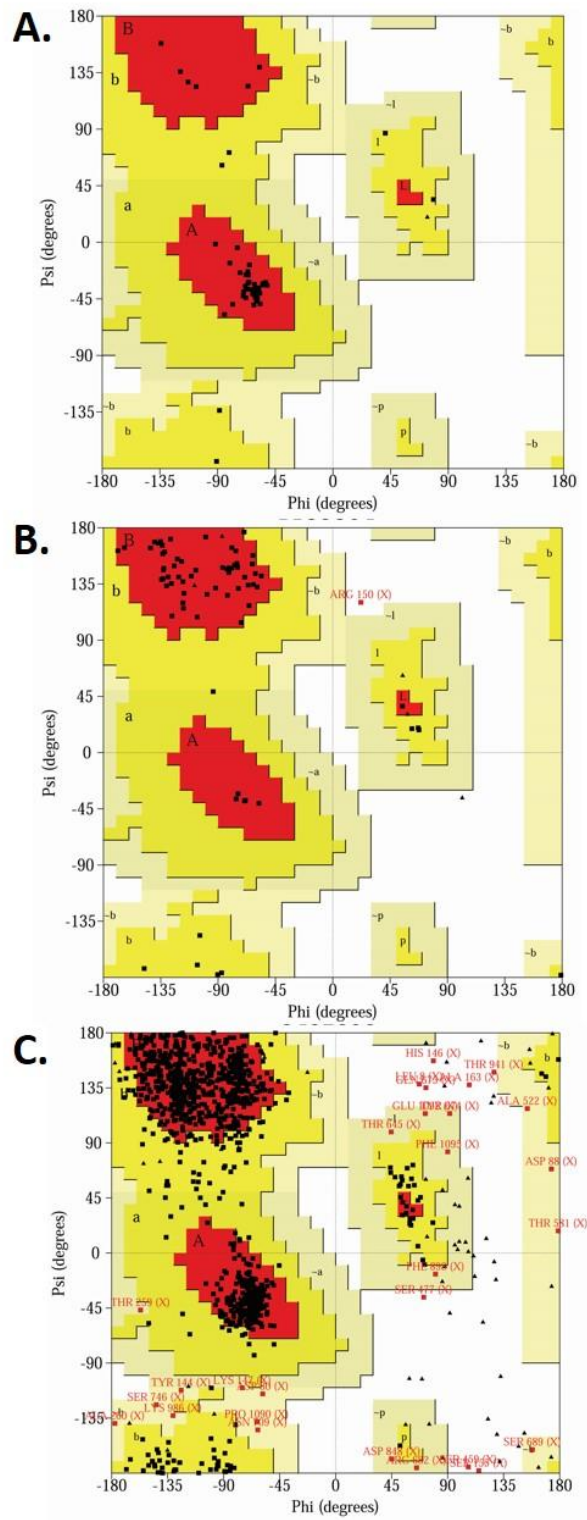

**Fig S5:** Ramachandran plot of the predicted model by PROCHECK, A. Envelope protein, B. Membrane glycoprotein and C. Spike surface glycoprotein, which shows that most of the residues are in the allowed region of the plot, proving the validity of the model.

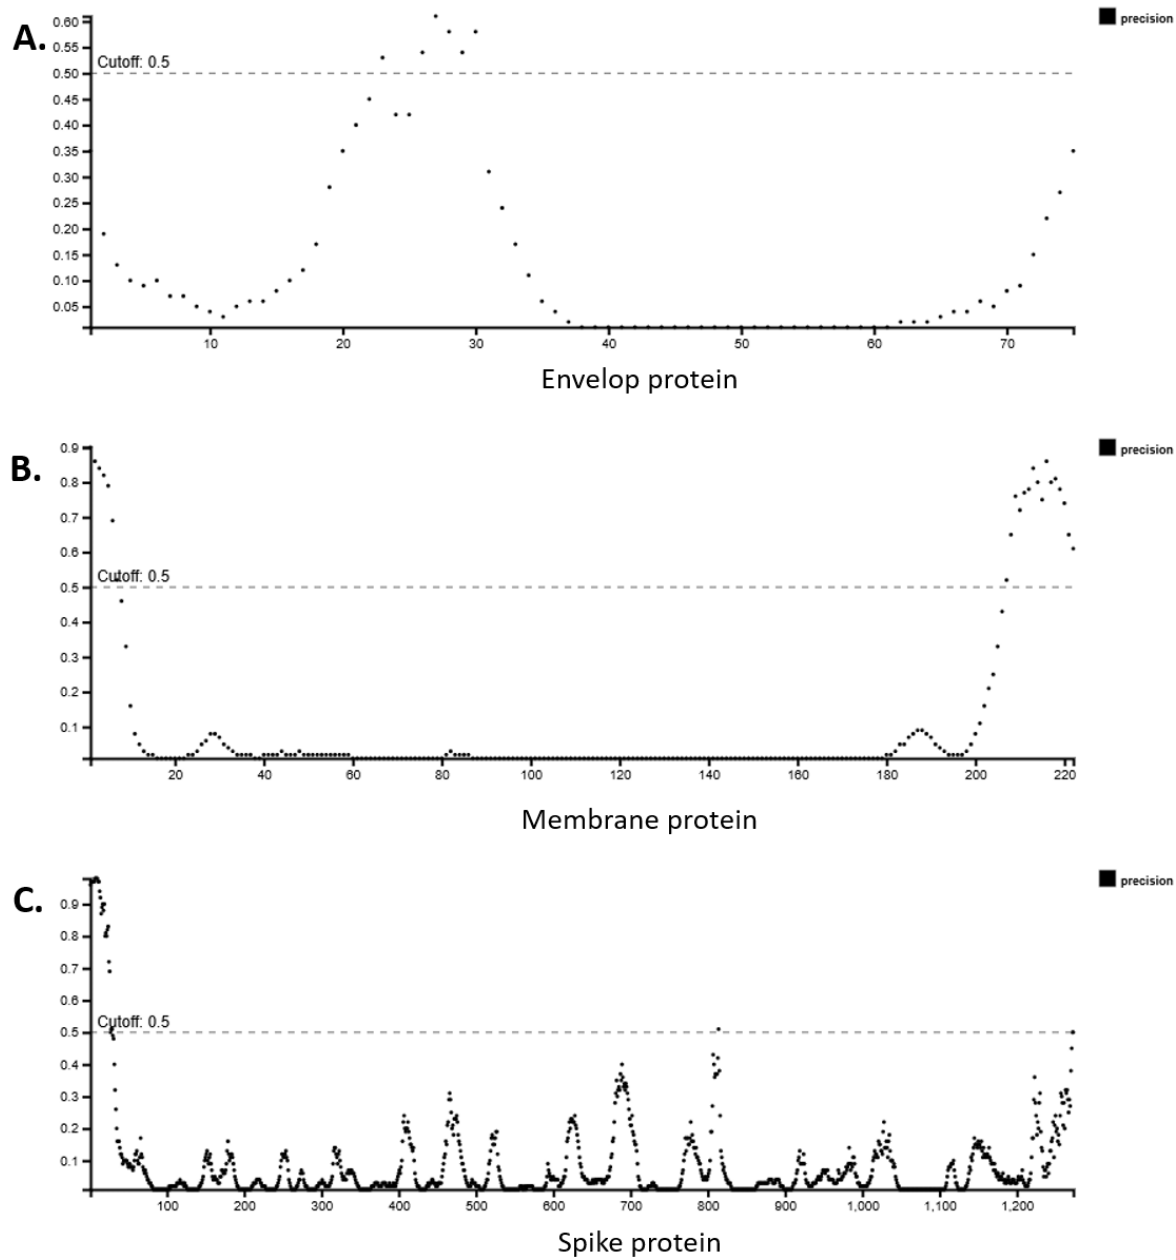

**Fig S6:** Disorder prediction of the amino acid sequences of A. Envelop protein, B. Membrane glycoprotein and C. Spike surface glycoprotein of Novel Corona Virus-2. Here, the potential epitopes localized outside of the disordered regions and securing their potentiality for being an effective vaccine candidate. Notes: Amino acids in the input sequence are considered disordered when the dotted line is above the gray dashed line, that is, when the confidence score is 0.5.

| Receptor residue | Peptide residue | Receptor residue | Peptide residue | Receptor residue | Peptide residue |
|------------------|-----------------|------------------|-----------------|------------------|-----------------|
| CYS D 164        | VAL A 2         | TRP D 167        | TYR A 1         | TYR D 159        | ARG A 5         |
| TRP D 156        | ASN A 8         | TYR D 159        | TYR A 3         | TRP D 156        | ARG A 5         |
| GLN D 155        | ARG A 5         | TRP D 156        | SER A 4         | GLU D 152        | LEU A 9         |
| GLU D 152        | LYS A 7         | GLU D 152        | ASN A 8         | GLU D 152        | ARG A 5         |
| TRP D 147        | ASN A 8         | TRP D 147        | LEU A 9         | LYS D 146        | LEU A 9         |
| TRP D 133        | ASN A 8         | THR D 143        | LEU A 9         | ILE D 124        | LEU A 9         |
| HIS D 114        | ASN A 8         | ILE D 124        | ASN A 8         | TYR D 99         | SER A 4         |
| TYR D 99         | VAL A 2         | TYR D 99         | TYR A 3         | ARG D 97         | ASN A 8         |
| ARG D 97         | SER A 4         | ARG D 97         | ARG A 5         | THR D 80         | LEU A 9         |
| THR D 73         | ASN A 8         | ASP D 77         | LEU A 9         | THR D 73         | VAL A 6         |
| ALA D 69         | VAL A 6         | HIS D 70         | SER A 4         | LYS D 66         | TYR A 3         |
| GLU D 63         | TYR A 1         | LYS D 66         | TYR A 1         | TYR D 59         | TYR A 1         |
| ILE D 52         | TYR A 1         | GLU D 55         | TYR A 1         | TRP D 51         | TYR A 1         |
| TYR D 7          | VAL A 2         | PHE D 33         | TYR A 1         | TYR D 7          | TYR A 1         |
| MET D 5          | TYR A 1         | MET D 5          | VAL A 2         |                  |                 |

**Fig S7:** Contact maps between the 9-mer peptide of Envelope protein (YVYSRVKNL) with HLA-A\*02:03. Here, the distances between two amino acids closer than 4.5 Å were shown. Polar contacts between the peptide-protein interactions shown by the red font.

| Receptor residue | Peptide residue | Receptor residue | Peptide residue | Receptor residue | Peptide residue |
|------------------|-----------------|------------------|-----------------|------------------|-----------------|
| THR A 163        | ILE B 3         | TRP A 167        | ILE B 3         | TRP A 167        | ALA B 1         |
| TYR A 159        | ILE B 3         | TYR A 159        | ARG B 5         | TYR A 159        | LEU B 4         |
| GLN A 155        | GLY B 6         | ALA A 158        | ARG B 5         | TRP A 156        | ARG B 5         |
| TRP A 147        | LEU B 8         | GLN A 155        | ARG B 5         | TRP A 147        | ARG B 9         |
| ILE A 124        | ARG B 9         | THR A 143        | ARG B 9         | LEU A 126        | LEU B 8         |
| ASP A 116        | LEU B 8         | ILE A 124        | LEU B 8         | ASP A 116        | ARG B 9         |
| ARG A 114        | GLY B 6         | ARG A 114        | LEU B 8         | ARG A 114        | HIS B 7         |
| TYR A 99         | ILE B 3         | TYR A 99         | ARG B 5         | TYR A 99         | LEU B 4         |
| MET A 97         | ARG B 9         | TYR A 99         | VAL B 2         | TYR A 99         | ALA B 1         |
| LEU A 81         | ARG B 9         | MET A 97         | HIS B 7         | ILE A 95         | ARG B 9         |
| ASP A 74         | ARG B 9         | ASP A 77         | ARG B 9         | ASP A 77         | LEU B 8         |
| GLN A 70         | HIS B 7         | THR A 73         | ARG B 9         | GLN A 70         | ARG B 9         |
| VAL A 67         | LEU B 4         | GLN A 70         | ARG B 5         | GLN A 70         | LEU B 4         |
| ASN A 66         | VAL B 2         | ASN A 66         | LEU B 4         | ASN A 66         | ILE B 3         |
| ASN A 63         | ALA B 1         | ASN A 63         | LEU B 4         | ASN A 63         | VAL B 2         |
| ILE A 52         | ALA B 1         | ARG A 62         | ILE B 3         | GLU A 55         | ALA B 1         |
| PHE A 33         | ALA B 1         | MET A 45         | ALA B 1         | VAL A 34         | ALA B 1         |
| TYR A 9          | LEU B 4         | TYR A 9          | ARG B 9         | TYR A 9          | HIS B 7         |
|                  |                 | TYR A 7          | LEU B 4         | TYR A 7          | VAL B 2         |

**Fig S8:** Contact maps between the 9-mer peptide of Membrane glycoprotein (AVILRGHLR) with HLA-A\*68:01. Here, the distances between two amino acids closer than 4.5 Å were shown. Polar contacts between the peptide-protein interactions shown by the red font.

| Receptor residue | Peptide residue | Receptor residue | Peptide residue | Receptor residue | Peptide residue |
|------------------|-----------------|------------------|-----------------|------------------|-----------------|
| CYS A 164        | TRP B 9         | CYS A 164        | ALA B 8         | TRP A 167        | TRP B 9         |
| TYR A 159        | ALA B 8         | LEU A 156        | VAL B 6         | THR A 163        | TRP B 9         |
| ALA A 152        | ALA B 4         | ALA A 150        | ARG B 2         | LEU A 156        | ALA B 4         |
| LEU A 147        | PHE B 3         | LEU A 147        | ARG B 2         | LEU A 147        | ALA B 4         |
| LYS A 146        | ARG B 2         | LYS A 146        | THR B 1         | LEU A 147        | THR B 1         |
| THR A 143        | THR B 1         | ILE A 124        | PHE B 3         | THR A 143        | PHE B 3         |
| ALA A 117        | PHE B 3         | SER A 116        | ALA B 4         | TYR A 123        | PHE B 3         |
| ASP A 114        | VAL B 6         | ASP A 114        | SER B 5         | <b>SER A 116</b> | <b>PHE B 3</b>  |
| <b>SER A 99</b>  | <b>TYR B 7</b>  | SER A 99         | VAL B 6         | ASP A 114        | ALA B 4         |
| <b>ARG A 97</b>  | <b>PHE B 3</b>  | ARG A 97         | ARG B 2         | ARG A 97         | SER B 5         |
| LEU A 81         | PHE B 3         | ASN A 80         | THR B 1         | LEU A 95         | PHE B 3         |
| SER A 77         | ARG B 2         | SER A 77         | THR B 1         | SER A 77         | PHE B 3         |
| ALA A 73         | SER B 5         | GLN A 70         | TYR B 7         | <b>VAL A 76</b>  | <b>THR B 1</b>  |
| GLN A 70         | SER B 5         | LYS A 66         | TYR B 7         | GLN A 70         | VAL B 6         |
| GLU A 63         | TRP B 9         | GLU A 63         | TYR B 7         | LYS A 66         | VAL B 6         |
| VAL A 34         | TYR B 7         | SER A 24         | TYR B 7         | TYR A 59         | TRP B 9         |
| <b>TYR A 7</b>   | <b>TRP B 9</b>  | TYR A 7          | TYR B 7         | ASP A 9          | TYR B 7         |
|                  |                 |                  |                 | MET A 5          | TRP B 9         |

**Fig S9:** Contact maps between the 9-mer peptide of S1 domain of Spike surface glycoprotein (TRFASVYAW) with HLA-C\*07:02. Here, the distances between two amino acids closer than 4.5 Å were shown. Polar contacts between the peptide-protein interactions shown by the red font.

| Receptor residue | Peptide residue | Receptor residue | Peptide residue | Receptor residue | Peptide residue |
|------------------|-----------------|------------------|-----------------|------------------|-----------------|
| GLN A 156        | VAL B 4         | GLN A 155        | VAL B 1         | GLN A 156        | PRO B 5         |
| TRP A 147        | PRO B 5         | TRP A 147        | VAL B 4         | TRP A 147        | GLN B 7         |
| THR A 143        | GLU B 8         | THR A 143        | GLN B 7         | TRP A 147        | VAL B 1         |
| TRP A 133        | ALA B 6         | TRP A 133        | PRO B 5         | THR A 143        | ALA B 6         |
| ALA A 125        | PRO B 5         | ILE A 124        | ALA B 6         | LEU A 126        | PRO B 5         |
| TYR A 123        | GLU B 8         | ASP A 116        | ALA B 6         | ILE A 124        | PRO B 5         |
| ASP A 116        | TYR B 3         | GLN A 115        | PRO B 5         | ASP A 116        | PRO B 5         |
| ARG A 114        | PRO B 5         | ARG A 114        | VAL B 4         | GLN A 115        | VAL B 4         |
| ARG A 114        | THR B 2         | ARG A 114        | VAL B 1         | ARG A 114        | TYR B 3         |
| TYR A 99         | THR B 2         | MET A 98         | VAL B 4         | TYR A 99         | VAL B 4         |
| ILE A 97         | TYR B 3         | ILE A 97         | THR B 2         | ILE A 97         | VAL B 4         |
| TYR A 84         | GLU B 8         | LEU A 81         | GLU B 8         | ILE A 95         | TYR B 3         |
| THR A 80         | GLU B 8         | ASP A 77         | GLU B 8         | THR A 80         | LYS B 9         |
| ASP A 77         | ALA B 6         | ASP A 77         | TYR B 3         | ASP A 77         | GLN B 7         |
| ASP A 74         | TYR B 3         | THR A 73         | TYR B 3         | VAL A 76         | LYS B 9         |
|                  |                 |                  |                 | GLN A 70         | THR B 2         |

**Fig S10:** Contact maps between the 9-mer peptide of S2 domain of Spike surface glycoprotein (VTYVPAQEK) with HLA-A\*11:01. Here, the distances between two amino acids closer than 4.5 Å were shown. Polar contacts between the peptide-protein interactions shown by the red font.

| Receptor residue | Peptide residue | Receptor residue | Peptide residue | Receptor residue | Peptide residue |
|------------------|-----------------|------------------|-----------------|------------------|-----------------|
| TYR B 78         | LEU C 13        | HIS B 81         | ASN C 14        | ASN B 82         | LEU C 13        |
| THR B 77         | LYS C 11        | TYR B 78         | VAL C 10        | TYR B 78         | LYS C 11        |
| GLN B 70         | ARG C 9         | ARG B 71         | ARG C 9         | ALA B 74         | ARG C 9         |
| TRP B 61         | TYR C 7         | TRP B 61         | SER C 8         | LEU B 67         | ARG C 9         |
| ASP B 57         | TYR C 5         | ASP B 57         | TYR C 7         | TRP B 61         | VAL C 6         |
| LEU B 53         | PHE C 4         | PRO B 56         | PHE C 4         | PRO B 56         | TYR C 5         |
| PHE B 40         | ARG C 9         | TYR B 47         | TYR C 7         | TYR B 47         | ARG C 9         |
| ARG B 29         | TYR C 7         | CYS B 30         | TYR C 5         | CYS B 30         | TYR C 7         |
| LEU B 11         | SER C 8         | GLU B 28         | TYR C 7         | GLU B 28         | ARG C 9         |
| TRP B 9          | TYR C 5         | LEU B 11         | TYR C 5         | LEU B 11         | TYR C 7         |
| ILE A 72         | PHE C 4         | ILE A 72         | TYR C 5         | ARG A 76         | PHE C 4         |
| ASN A 69         | VAL C 6         | ILE A 72         | PRO C 2         | ILE A 72         | SER C 3         |
| VAL A 65         | TYR C 7         | VAL A 65         | SER C 8         | ASN A 69         | TYR C 5         |
| ASN A 62         | ARG C 9         | ASN A 62         | VAL C 10        | VAL A 65         | VAL C 6         |
| ALA A 59         | ASN C 12        | ALA A 61         | VAL C 10        | ASN A 62         | SER C 8         |
| GLU A 55         | SER C 15        | GLY A 58         | VAL C 10        | GLY A 58         | ASN C 12        |
| PHE A 54         | LEU C 13        | PHE A 54         | SER C 15        | GLU A 55         | ASN C 12        |
| PHE A 32         | LEU C 13        | SER A 53         | LEU C 13        | PHE A 54         | ASN C 12        |
| PHE A 22         | VAL C 10        | PHE A 22         | ASN C 12        | PHE A 32         | ASN C 12        |

**Fig S11:** Contact maps between the 15-mer peptide of Envelope protein (KPSFYVYSRVKNLNS) with HLA-DRB1\*01:01. Here, the distances between two amino acids closer than 4.5 Å were shown. Polar contacts between the peptide-protein interactions shown by the red font.

| Receptor residue | Peptide residue | Receptor residue | Peptide residue | Receptor residue | Peptide residue |
|------------------|-----------------|------------------|-----------------|------------------|-----------------|
| GLY B 86         | GLY C 15        | THR B 90         | GLY C 15        | VAL B 85         | GLY C 15        |
| VAL B 85         | ILE C 13        | VAL B 85         | ALA C 14        | ASN B 82         | GLY C 15        |
| ASN B 82         | ILE C 13        | ASN B 82         | ALA C 14        | ASN B 82         | ARG C 12        |
| HIS B 81         | ARG C 12        | HIS B 81         | ILE C 13        | TYR B 78         | ARG C 12        |
| TYR B 78         | HIS C 10        | TYR B 78         | LEU C 11        | ARG B 71         | GLY C 9         |
| LEU B 67         | LEU C 7         | LEU B 67         | ARG C 8         | LEU B 67         | ILE C 6         |
| TRP B 61         | ARG C 8         | GLN B 64         | ILE C 6         | TRP B 61         | LEU C 7         |
| TYR B 60         | ILE C 6         | TRP B 61         | ILE C 6         | ASP B 57         | LEU C 7         |
| ASP B 57         | VAL C 5         | ASP B 57         | ILE C 6         | TYR B 47         | LEU C 7         |
| CYS B 30         | LEU C 7         | VAL B 38         | LEU C 7         | GLU B 28         | GLY C 9         |
| GLU B 28         | LEU C 7         | GLU B 28         | ARG C 8         | PHE B 13         | HIS C 10        |
| ILE A 72         | VAL C 5         | PHE B 13         | GLY C 9         | ASN A 69         | LEU C 7         |
| ALA A 68         | ILE C 2         | ASN A 69         | VAL C 5         | VAL A 65         | ILE C 2         |
| ALA A 61         | HIS C 10        | ASN A 62         | HIS C 10        | ALA A 59         | HIS C 10        |
| GLU A 55         | LEU C 11        | GLY A 58         | HIS C 10        | PHE A 54         | ARG C 12        |
| SER A 53         | ILE C 13        | SER A 53         | ALA C 14        | PHE A 48         | GLY C 15        |
| PHE A 32         | ALA C 14        | PHE A 48         | ALA C 14        | PHE A 32         | ARG C 12        |
| ILE A 31         | ALA C 14        | ILE A 31         | GLY C 15        | PHE A 26         | GLY C 15        |
| PHE A 24         | ALA C 14        | PHE A 24         | GLY C 15        | PHE A 24         | ARG C 12        |
| PHE A 22         | ARG C 12        | MET A 23         | ARG C 12        | PHE A 22         | HIS C 10        |
| GLN A 9          | ARG C 12        | GLU A 11         | HIS C 10        | GLN A 9          | LEU C 11        |
| ILE A 7          | GLY C 15        | GLN A 9          | HIS C 10        |                  |                 |

**Fig S12:** Contact maps between the 15-mer peptide of Membrane glycoprotein (VIGAVILRGHLRIAG) with HLA-DRB1\*01:01. Here, the distances between two amino acids closer than 4.5 Å were shown. Polar contacts between the peptide-protein interactions shown by the red font.

| Receptor residue | Peptide residue | Receptor residue | Peptide residue | Receptor residue | Peptide residue |
|------------------|-----------------|------------------|-----------------|------------------|-----------------|
| ASN B 82         | ARG C 5         | LEU B 85         | ARG C 5         | THR B 77         | ALA C 3         |
| THR B 71         | VAL C 9         | GLU B 74         | VAL C 9         | ARG B 70         | VAL C 9         |
| TRP B 61         | VAL C 9         | ARG B 70         | ASN C 2         | TYR B 60         | ARG C 14        |
| TYR B 37         | TRP C 12        | TYR B 60         | ASN C 13        | TYR B 30         | TRP C 12        |
| PHE B 11         | SER C 8         | PHE B 11         | VAL C 9         | ILE A 72         | TRP C 12        |
| HIS A 68         | TRP C 12        | ASN A 71         | TRP C 12        | HIS A 68         | ALA C 11        |
| LYS A 67         | LYS C 15        | HIS A 68         | TYR C 10        | LYS A 67         | TRP C 12        |
| THR A 61         | TYR C 10        | ALA A 64         | TYR C 10        | THR A 61         | SER C 8         |
| THR A 61         | PHE C 6         | THR A 61         | ALA C 7         | LEU A 60         | TYR C 10        |
| GLN A 57         | ALA C 7         | PHE A 58         | PHE C 6         | GLN A 57         | PHE C 6         |
| GLN A 57         | ASN C 2         | GLN A 57         | THR C 4         | GLN A 57         | PHE C 1         |
| PHE A 54         | PHE C 1         | PHE A 54         | THR C 4         | ARG A 53         | PHE C 6         |
| ARG A 53         | THR C 4         | ARG A 53         | ARG C 5         | ARG A 52         | THR C 4         |
| LEU A 47         | ARG C 5         | PHE A 51         | THR C 4         | GLU A 31         | ARG C 5         |
| GLU A 25         | ARG C 5         | GLU A 30         | ARG C 5         | SER A 23         | ARG C 5         |
| GLN A 21         | PHE C 6         | TYR A 22         | PHE C 6         | VAL A 10         | PHE C 6         |
| TYR A 9          | SER C 8         | GLY A 9          | PHE C 6         | TYR A 9          | ALA C 7         |
| TYR A 9          | ARG C 5         | TYR A 9          | PHE C 6         |                  |                 |

**Fig S13:** Contact maps between the 15-mer peptide of Spike surface glycoprotein, S1 (FNATRFASVYAWNRRK) with DQA1/DQB1. Here, the distances between two amino acids closer than 4.5 Å were shown. Polar contacts between the peptide-protein interactions shown by the red font.

| Receptor residue | Peptide residue | Receptor residue | Peptide residue | Receptor residue | Peptide residue |
|------------------|-----------------|------------------|-----------------|------------------|-----------------|
| HIS B 81         | ALA C 9         | TYR B 78         | VAL C 7         | TYR B 78         | PRO C 8         |
| TYR B 78         | TYR C 6         | ARG B 71         | LYS C 12        | THR B 77         | GLU C 11        |
| ARG B 71         | GLU C 11        | GLN B 70         | ASN C 13        | ARG B 71         | TYR C 6         |
| GLN B 70         | GLU C 11        | LEU B 67         | ASN C 13        | LEU B 67         | PHE C 14        |
| LEU B 67         | LEU C 2         | GLN B 64         | ASN C 13        | ASP B 66         | ASN C 13        |
| TRP B 61         | PHE C 14        | TRP B 61         | VAL C 4         | TRP B 61         | LYS C 12        |
| TRP B 61         | HIS C 3         | TYR B 60         | LEU C 2         | TRP B 61         | LEU C 2         |
| ASP B 57         | HIS C 3         | ASP B 57         | PHE C 1         | ASP B 57         | LEU C 2         |
| TYR B 47         | VAL C 4         | CYS B 30         | HIS C 3         | CYS B 30         | VAL C 4         |
| GLU B 28         | VAL C 4         | PHE B 13         | THR C 5         | PHE B 13         | TYR C 6         |
| PHE B 13         | VAL C 4         | LEU B 11         | VAL C 4         | LEU B 11         | THR C 5         |
| MET A 73         | PHE C 1         | ASN A 69         | HIS C 3         | ILE A 72         | PHE C 1         |
| ASN A 69         | PHE C 1         | VAL A 65         | THR C 15        | ASP A 66         | HIS C 3         |
| VAL A 65         | HIS C 3         | ASN A 62         | VAL C 7         | ASN A 62         | THR C 15        |
| ASN A 62         | THR C 5         | ALA A 61         | THR C 15        | ASN A 62         | HIS C 3         |
| ALA A 59         | VAL C 7         | GLY A 58         | GLN C 10        | GLY A 58         | THR C 15        |
| GLY A 58         | VAL C 7         | GLN A 57         | GLN C 10        | GLY A 58         | TYR C 6         |
| GLU A 55         | GLN C 10        | PHE A 54         | VAL C 7         | PHE A 54         | PRO C 8         |
| PHE A 22         | PRO C 8         | GLU A 11         | THR C 5         | PHE A 22         | VAL C 7         |
| GLN A 9          | PRO C 8         | GLN A 9          | TYR C 6         | GLN A 9          | VAL C 7         |
| GLN A 9          | THR C 5         |                  |                 |                  |                 |

**Fig S14:** Contact maps between the 15-mer peptide of S2 domain of Spike surface glycoprotein (FLHVTYVPAQEKNFT) with HLA-DRB1\*01:01. Here, the distances between two amino acids closer than 4.5 Å were shown. Polar contacts between the peptide-protein interactions shown by the red font.

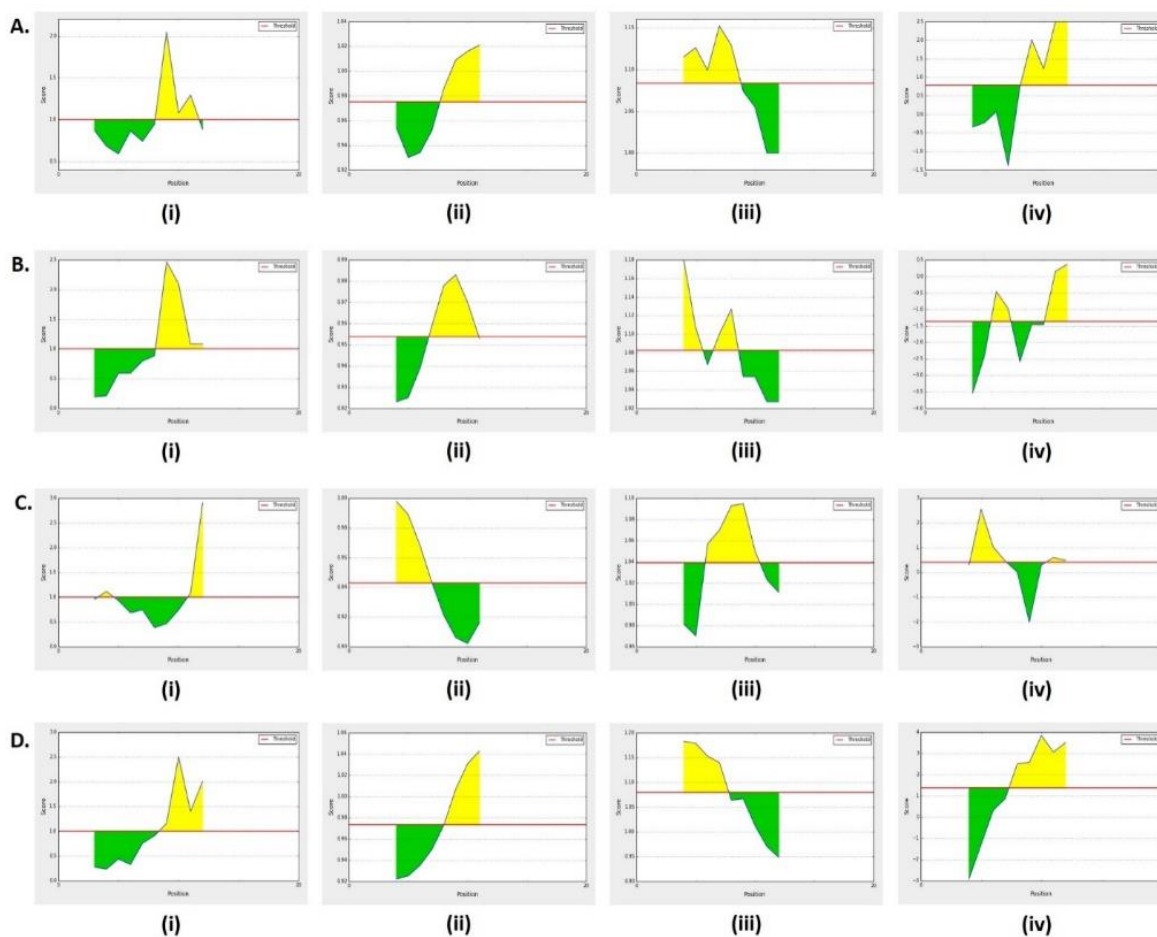

**Fig S15:** Prediction of B-cell epitope for epitope (A) CVEnvA2, (B) CVMemB2, (C) CVS1A2 and (D) CVS2B2. The column showed the analyses of the respective peptides with i. Emini surface accessibility prediction, ii. Karplus & Schulz Flexibility Prediction, iii. Kolaskar and Tongaonkar antigenicity prediction and, iv. Parker hydrophilicity prediction. Notes: the x-axis and y-axis of the plot reflects the sequence location and antigenic propensity, respectively. The areas over the threshold line are antigenic that are labeled as yellow.

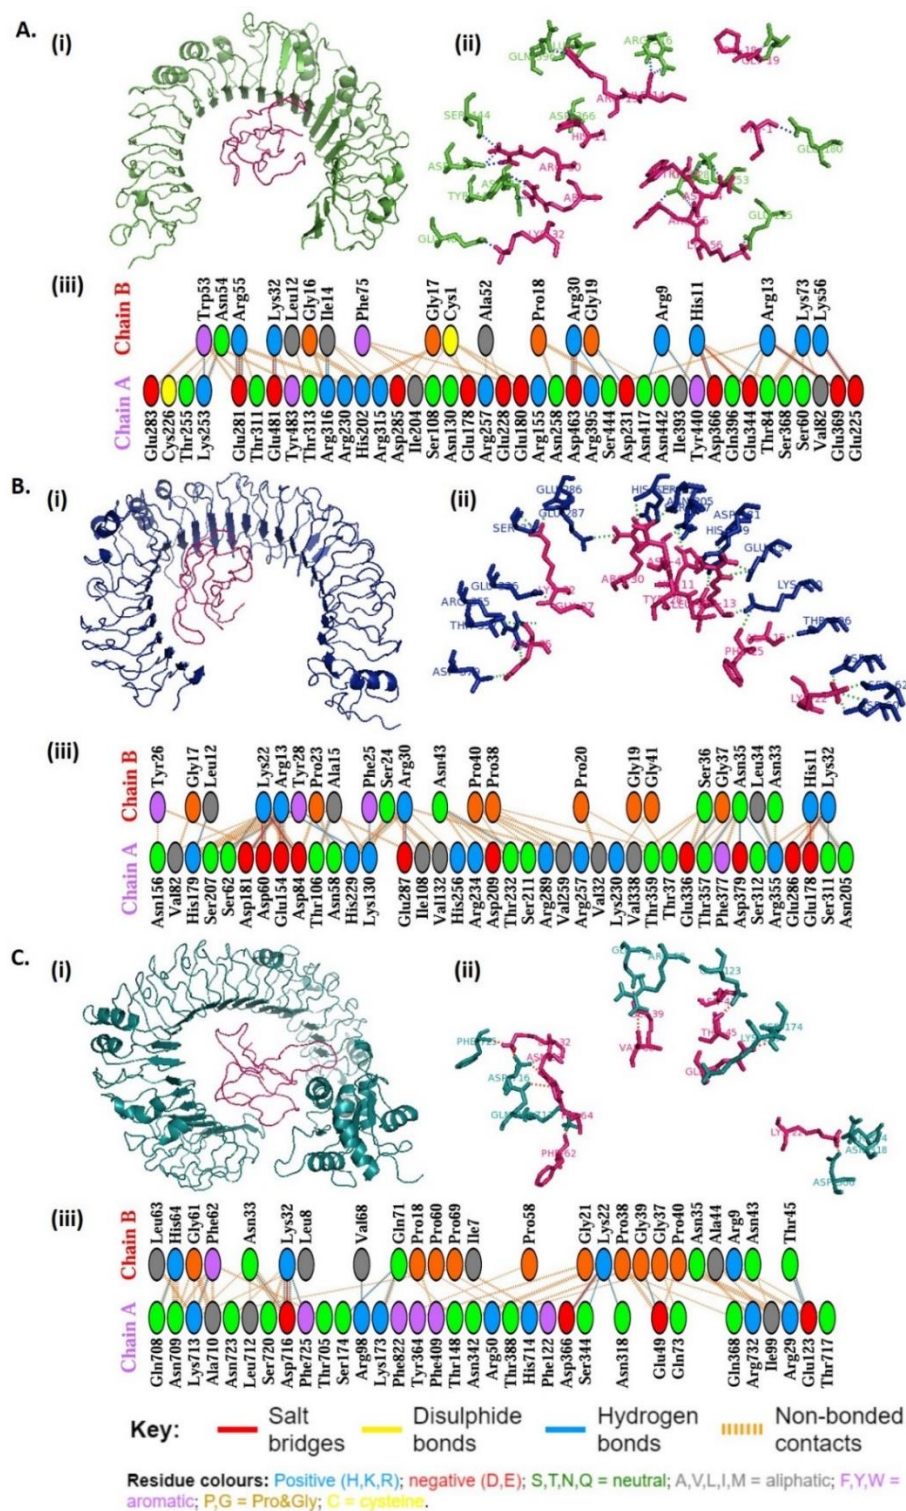

**Fig S16: Docking of MEV with the Toll like receptors.** A. (i) Cartoon representation of the docked complex with TLR2, (ii) The prominent residues of TLR2 and MEV involved in polar interaction, (iii) The different interacting residues extracted by PDBsum server. B. (i) Cartoon representation of the docked complex with TLR4, (ii) The prominent residues of TLR4 and MEV involved in polar interaction, (iii) The different interacting residues extracted by PDBsum server, and C. (i) Cartoon representation of the docked complex with TLR5, (ii) The prominent residues of TLR5 and MEV involved in polar interaction, (iii) The different interacting residues extracted by PDBsum server.

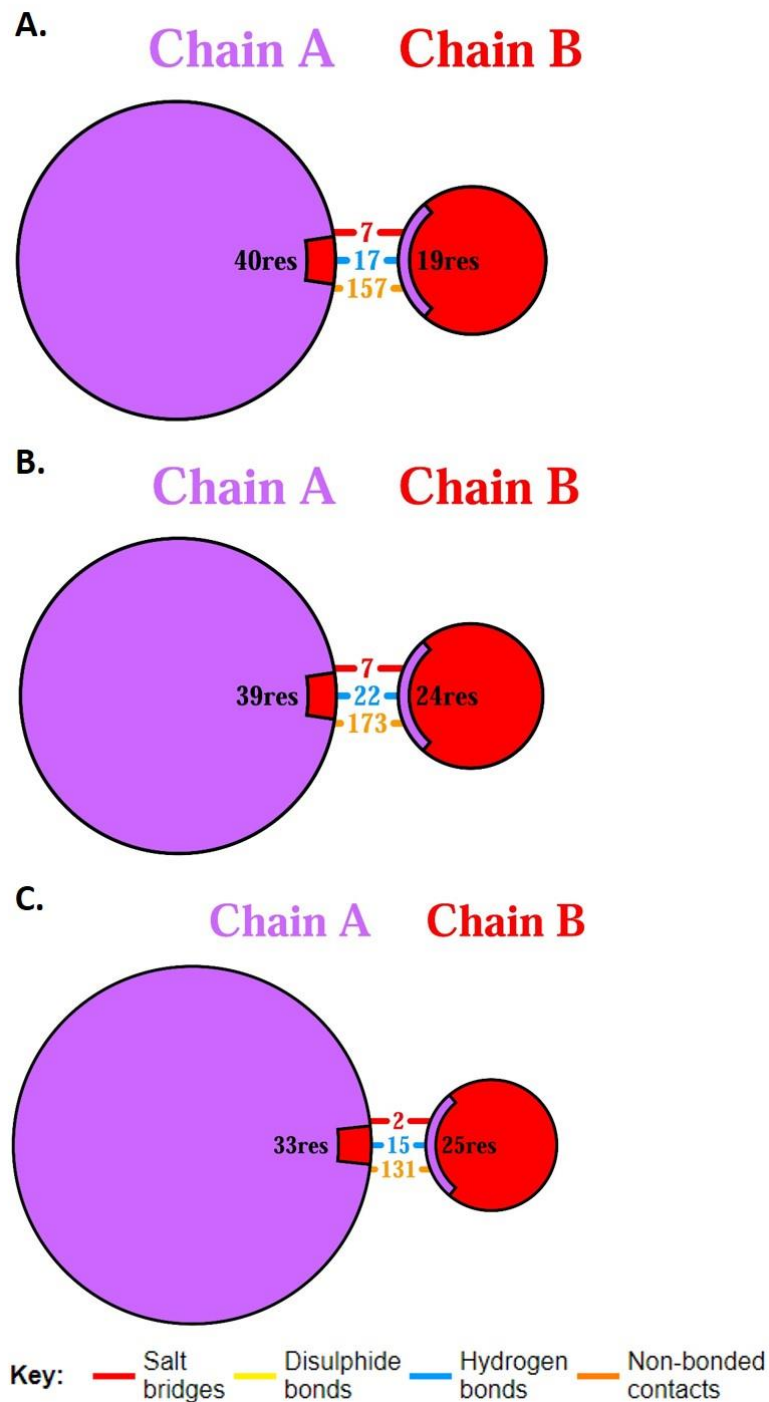

**Fig S17:** The Schematic diagram of the interactions between the multi-epitope vaccine and the TLR2 (A), TLR4 (B), and TLR5 (C). Different types of interactions are designated by different colors mentioned in the keys. The number of interacting residues in Chain A (TLR2, TLR4, or TLR5) and Chain B (CVMW) are shown inside the circle, and the number of possible bonds is shown in between the circle.

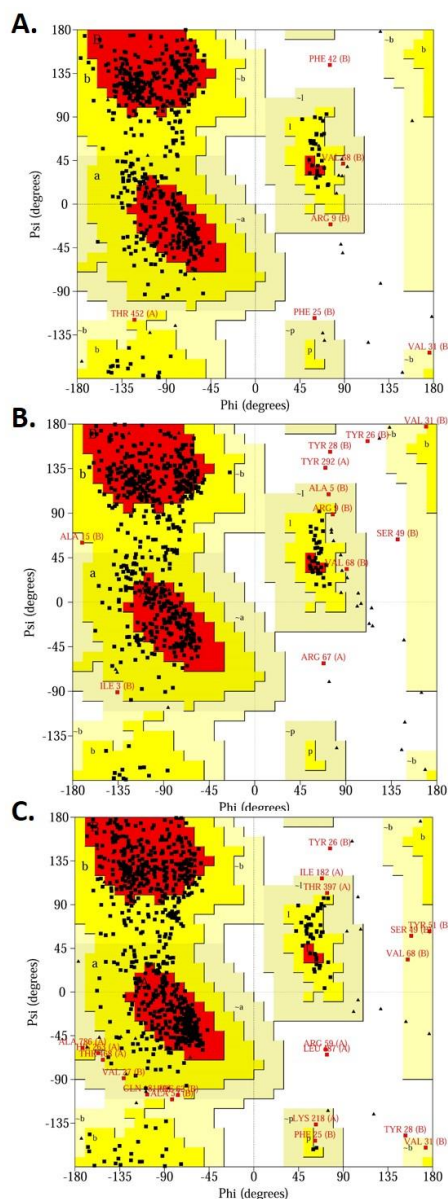

**Fig S18: Ramachandran plot analysis of the docked complex of CVMW with Toll Like Receptors by PROCHECK.** A. TLR2 complexed with CVMW vaccine construct. The 70.3% residues were in the most favoured region, 28.6% were in additional allowed region, 0.7% were in generously allowed regions, and 0.4% were in disallowed region. B. TLR4 complexed with CVMW vaccine construct. The 71.2% residues were in the most favoured region, 27.0% were in additional allowed region, 1.0% were in generously allowed regions, and 0.8% were in disallowed region. C. TLR5 complexed with CVMW vaccine construct. The 70.8% residues were in the most favoured region, 26.8% were in additional allowed region, 1.9% were in generously allowed regions, and 0.5% were in disallowed region.

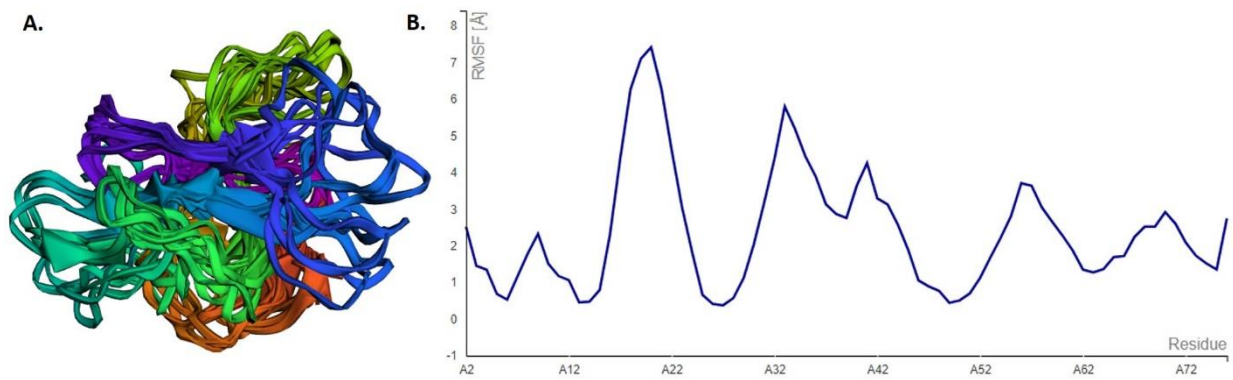

**Fig S19: The Root Mean Square Fluctuation (RMSF) analyses of the multi-epitope vaccine, CVMW by CABS-flex v 2.0.** A. The cartoon representation of the top ten models showing fluctuations in several regions of the vaccine. B. RMSF plot of the multi-epitope vaccine representing the obvious fluctuation on the residues during simulation.

**Table S1:** The predicted T-cell epitopes of Envelope protein, Membrane glycoprotein, and S1 and S2 domain of spike surface glycoprotein by the NetCTL server based on the combined score. Here, epitopes for the 10 different HLA supertypes of Envelope protein, 12 HLA supertypes of Membrane glycoprotein, S1 and S2 domain have been represented.

| Super types | Predicted epitopes for Envelope protein (start position) | Combined score | Predicted epitopes for Membrane glycoprotein (start position) | Combined score | Predicted epitopes for S1 protein (start position) | Combined score | Predicted epitopes for S2 protein (start position) | Combined score |
|-------------|----------------------------------------------------------|----------------|---------------------------------------------------------------|----------------|----------------------------------------------------|----------------|----------------------------------------------------|----------------|
| a1          | LTALRLCAY (34)                                           | 2.3303         | ATSRTLSTYY (171)                                              | 3.7695         | CVADYSVLY (361)                                    | 2.3459         | LTDEMIAQY (865)                                    | 5.2958         |
| a2          | SLVKPSFYV (50)                                           | 1.4461         | GLMWLSYFI (89)                                                | 1.5462         | KIADYNYKL (417)                                    | 1.116          | FIAGLIAIV (1220)                                   | 1.4022         |
| a3          | SFYVYSRVK (55)                                           | 1.3954         | AVILRGHLR (142)                                               | 1.4462         | SVYAWNRRK (349)                                    | 1.431          | VTYVPAQEK (1065)                                   | 1.7543         |
| a24         | VFLVTLAI (25)                                            | 1.2004         | RYRIGNYKL (198)                                               | 1.3445         | PYRVVLSF (507)                                     | 1.6823         | VYDPLQPEL (1137)                                   | 1.2944         |
| a26         | LTALRLCAY (34)                                           | 1.5975         | ATSRTLSTYY (171)                                              | 1.385          | RISNCVADY (357)                                    | 1.4543         | GTITSGWTF (880)                                    | 1.4942         |
| b4          |                                                          |                |                                                               |                | GEVFNATRF (339)                                    | 1.6183         | AEIRASANL (1016)                                   | 1.6389         |
| b7          | FVSEETGTL (4)                                            | 1.1281         | FAAYSRYRI (193)                                               | 1.2196         | APATVCGPK (520)                                    | 0.8604         | SPRRARSA (680)                                     | 1.8685         |
| b8          | YVYSRVKNL (57)                                           | 1.1002         | ELKKLLEQW (12)                                                | 1.2715         | PYRVVLSF (507)                                     | 1.6219         | QDKNTQEVF (774)                                    | 1.4769         |
| b27         |                                                          |                | SRYRIGNYK (197)                                               | 2.8527         | TRFASVYAW (345)                                    | 0.8532         | GRLQSLQTY (999)                                    | 2.6259         |
| b39         | FVSEETGTL (4)                                            | 0.9372         | SFNPETNIL (111)                                               | 1.5475         | IRGDEVRFI (402)                                    | 1.9243         | AHFPREGVF (1087)                                   | 2.2944         |
| b44         |                                                          |                | KEITVATSR (166)                                               | 1.1148         |                                                    |                |                                                    |                |
| b58         | VSLVKPSFY (49)                                           | 1.2216         | KLIFLWLLW (50)                                                | 1.8977         |                                                    |                |                                                    |                |
| b59         |                                                          |                |                                                               |                | ASFSTFKCY (372)                                    | 1.139          | QSAPHGVVF (1054)                                   | 1.9203         |
| b62         | LVKPSFYVY (51)                                           | 1.6543         | WLSYFIASF (92)                                                | 1.6198         | GQTGKIADY (413)                                    | 2.962          | LGAENSVAY (699)                                    | 1.4998         |

**Table S2:** The potential CD8+ T-cell epitopes of Envelope protein and their respective MHC class I alleles with IC50 < 250 nM.

| Peptides  | Alleles                                                                               | Number of Alleles |
|-----------|---------------------------------------------------------------------------------------|-------------------|
| LTALRLCAY | HLA-A*01:01 (108.78), HLA-A*30:02 (241.8), HLA-B*15:01 (141.91)                       | 3                 |
| SLVKPSFYV | HLA-A*02:06 (19.26), HLA-A*02:01 (21.43), HLA-A*02:03 (33.65), HLA-A*68:02 (141.45)   | 4                 |
| SFYVYSRVK | HLA-A*30:01 (96.15), HLA-A*11:01 (247.34)                                             | 2                 |
| VFLVTLAI  | HLA-A*23:01 (113.61)                                                                  | 1                 |
| FVSEETGTL | HLA-A*02:03 (87.29), HLA-A*02:06 (92.59), HLA-B*35:01 (193.9), HLA-A*68:02 (239.11)   | 4                 |
| YVYSRVKNL | HLA-A*02:03 (102.32)                                                                  | 1                 |
| VSLVKPSFY | HLA-A*30:02 (105.55)                                                                  | 1                 |
| LVKPSFYVY | HLA-B*15:01 (25.06), HLA-A*30:02 (171.58), HLA-A*30:01 (233.87), HLA-B*35:01 (157.97) | 4                 |

**Table S3:** The potential CD4+ T-cell epitopes of Envelope protein and their respective MHC class II alleles with IC50 < 200 nM.

| Peptide             | Alleles                                                                                                                                                                                                                                                                                                                                                                                                                                                                                             | Number of Alleles (Predivac Score) |
|---------------------|-----------------------------------------------------------------------------------------------------------------------------------------------------------------------------------------------------------------------------------------------------------------------------------------------------------------------------------------------------------------------------------------------------------------------------------------------------------------------------------------------------|------------------------------------|
| LAILTALRLCA<br>YCCN | HLA-DRB1*01:04 (63.2), HLA-DRB1*10:02 (79.54), HLA-DQA1*01:02/DQB1*05:01 (87.54), HLA-DQA1*01:06/DQB1*05:01 (87.54), HLA-DQA1*01:08/DQB1*05:01 (87.54), HLA-DQA1*01:09/DQB1*05:01 (87.54)                                                                                                                                                                                                                                                                                                           | 06<br>(80.46)                      |
| MYSFVSEETGT<br>LIVN | HLA-DRB1*01:11 (53.85), HLA-DRB1*10:01 (76.67), HLA-DRB1*10:03 (76.67), HLA-DRB1*01:14 (75.37), HLA-DRB1*01:10 (87.76), HLA-DRB1*01:05 (64.93), HLA-DRB1*01:07 (64.93), HLA-DRB1*01:08 (64.93), HLA-DRB1*01:01 (64.93), HLA-DRB1*01:12 (64.93), HLA-DRB1*01:25 (64.93), HLA-DRB1*01:22 (64.93), HLA-DRB1*01:19 (64.93), HLA-DRB1*01:13 (40.9), HLA-DRB1*01:18 (60.17)                                                                                                                               | 15<br>(82.49)                      |
| KPSFYVYSRVK<br>NLNS | HLA-DRB1*07:06 (66.98), HLA-DRB1*16:14 (92.4), HLA-DRB1*16:12 (84.38), HLA-DRB1*07:01 (51.78), HLA-DRB1*07:05 (51.78), HLA-DRB1*07:03 (51.78), HLA-DRB1*07:07 (51.78), HLA-DRB1*07:13 (51.78), HLA-DRB1*07:08 (51.78), HLA-DRB1*07:16 (51.78), HLA-DRB1*07:15 (51.78), HLA-DRB1*07:19 (51.78), HLA-DRB1*07:14 (51.78), HLA-DRB1*11:11 (66.09), HLA-DRB1*16:16 (88.72), HLA-DRB1*16:02 (88.72), HLA-DRB1*16:11 (88.72), HLA-DRB1*07:12 (51.58), HLA-DRB1*07:11 (56.19), HLA-DRB1*07:09 (73.06), HLA- | 127<br>(82.69)                     |

|  |                                                                                                                                                                                                                                                                                                                                                                                                                                                                                                                                                                                                                                                                                                                                                                                                                                                                                                                                                                                                                                                                                                                                                                                                                                                                                                                                                                                                                                                                                                                                                                                                                                                                                                                                                                                                                                                                                                                                                                                                                                                                                                                                                                                                                                                                                                                                                                                                                                                                                                                                                                                                                                                                                                                                                                                                                                                                                                                                                                                                                                                                                                                                               |  |
|--|-----------------------------------------------------------------------------------------------------------------------------------------------------------------------------------------------------------------------------------------------------------------------------------------------------------------------------------------------------------------------------------------------------------------------------------------------------------------------------------------------------------------------------------------------------------------------------------------------------------------------------------------------------------------------------------------------------------------------------------------------------------------------------------------------------------------------------------------------------------------------------------------------------------------------------------------------------------------------------------------------------------------------------------------------------------------------------------------------------------------------------------------------------------------------------------------------------------------------------------------------------------------------------------------------------------------------------------------------------------------------------------------------------------------------------------------------------------------------------------------------------------------------------------------------------------------------------------------------------------------------------------------------------------------------------------------------------------------------------------------------------------------------------------------------------------------------------------------------------------------------------------------------------------------------------------------------------------------------------------------------------------------------------------------------------------------------------------------------------------------------------------------------------------------------------------------------------------------------------------------------------------------------------------------------------------------------------------------------------------------------------------------------------------------------------------------------------------------------------------------------------------------------------------------------------------------------------------------------------------------------------------------------------------------------------------------------------------------------------------------------------------------------------------------------------------------------------------------------------------------------------------------------------------------------------------------------------------------------------------------------------------------------------------------------------------------------------------------------------------------------------------------------|--|
|  | <p>DRB1*16:10 (73.64), HLA-DRB1*07:04 (79.04), HLA-DRB5*01:02 (68.71), HLA-DRB5*01:08 (68.71), HLA-DRB1*01:09 (78.99), HLA-DRB1*01:13 (16.54), HLA-DRB5*01:01 (66.46), HLA-DRB5*01:14 (66.46), HLA-DRB5*01:13 (66.46), HLA-DRB5*01:05 (66.46), HLA-DRB1*10:01 (44.65), HLA-DRB1*10:03 (44.65), HLA-DRB1*01:10 (47.97), HLA-DRB1*01:21 (74.02), HLA-DRB1*01:11 (50.28), HLA-DRB1*01:14 (51.99), HLA-DRB1*01:05 (39.91), HLA-DRB1*01:07 (39.91), HLA-DRB1*01:08 (39.91), HLA-DRB1*01:01 (39.91), HLA-DRB1*01:12 (39.91), HLA-DRB1*01:25 (39.91), HLA-DRB1*01:22 (39.91), HLA-DRB1*01:19 (39.91), HLA-DRB1*01:18 (35.98), HLA-DRB1*01:04 (98.06), HLA-DRB3*03:01 (95.02), HLA-DRB1*09:05 (105.21), HLA-DRB1*09:07 (108.47), HLA-DRB1*09:01 (108.86), HLA-DRB1*09:09 (108.86), HLA-DRB1*01:20 (109.52), HLA-DRB1*01:24 (111.98), HLA-DRB5*01:04 (112.29), HLA-DRB1*01:17 (112.58), HLA-DRB5*01:03 (113.34), HLA-DRB1*10:02 (115.4), HLA-DRB1*09:02 (116.28), HLA-DRB5*01:12 (118.58), HLA-DRB1*14:16 (123.14), HLA-DRB1*11:13 (129.09), HLA-DRB1*11:08 (132.41), HLA-DRB3*02:09 (136.08), HLA-DRB3*02:21 (136.08), HLA-DRB1*08:08 (136.59), HLA-DRB1*08:11 (136.59), HLA-DRB1*15:06 (143.73), HLA-DRB1*15:13 (143.73), HLA-DRB1*15:01 (143.73), HLA-DRB1*15:09 (143.73), HLA-DRB1*15:20 (143.73), HLA-DRB1*15:16 (143.73), HLA-DRB1*15:24 (143.73), HLA-DRB1*15:22 (143.73), HLA-DRB3*02:17 (153.65), HLA-DRB1*15:07 (162.17), HLA-DRB3*02:16 (167.81), HLA-DRB3*02:15 (170.66), HLA-DRB3*02:14 (171.62), HLA-DRB1*09:08 (175.22), HLA-DRB1*01:06 (175.38), HLA-DRB1*13:08 (175.62), HLA-DRB1*14:09 (186.54), HLA-DRB1*08:07 (188.13), HLA-DRB1*09:03 (198.75), HLA-DPA1*01:03/DPB1*08:01 (194.99), HLA-DPA1*01:04/DPB1*08:01 (194.99), HLA-DPA1*01:05/DPB1*08:01 (194.99), HLA-DPA1*01:07/DPB1*08:01 (194.99), HLA-DPA1*01:08/DPB1*08:01 (194.99), HLA-DPA1*01:09/DPB1*08:01 (194.99), HLA-DPA1*01:10/DPB1*08:01 (194.99), HLA-DPA1*02:02/DPB1*08:01 (122.65), HLA-DPA1*02:03/DPB1*08:01 (194.99), HLA-DPA1*02:04/DPB1*08:01 (122.65), HLA-DPA1*02:02/DPB1*19:01 (126.81), HLA-DPA1*02:04/DPB1*19:01 (126.81), HLA-DPA1*03:02/DPB1*08:01 (128.12), HLA-DPA1*03:02/DPB1*19:01 (141.14), HLA-DPA1*03:02/DPB1*04:01 (148.56), HLA-DPA1*03:02/DPB1*23:01 (148.56), HLA-DPA1*03:02/DPB1*22:01 (175.54), HLA-DPA1*02:02/DPB1*01:01 (149.32), HLA-DPA1*02:04/DPB1*01:01 (149.32), HLA-DPA1*03:02/DPB1*16:01 (180.01), HLA-DPA1*03:02/DPB1*02:02 (111.88), HLA-DPA1*04:01/DPB1*02:01 (178.07), HLA-DPA1*04:01/DPB1*08:01 (176.96), HLA-DQA1*05:01/DQB1*04:01 (194), HLA-DQA1*05:01/DQB1*04:06 (194), HLA-DQA1*05:03/DQB1*04:06 (194), HLA-DQA1*05:03/DQB1*04:01 (194), HLA-DQA1*05:04/DQB1*04:01 (194), HLA-DQA1*05:04/DQB1*04:06 (194), HLA-DQA1*05:05/DQB1*04:06 (194), HLA-DQA1*05:05/DQB1*04:01 (194), HLA-DQA1*05:06/DQB1*04:06 (194), HLA-DQA1*05:06/DQB1*04:01 (194), HLA-DQA1*05:07/DQB1*04:01 (194), HLA-DQA1*05:07/DQB1*04:06 (194), HLA-DQA1*05:08/DQB1*04:01 (194), HLA-DQA1*05:09/DQB1*04:06 (194), HLA-DQA1*05:09/DQB1*04:01 (194), HLA-DQA1*05:08/DQB1*04:06 (194), HLA-DQA1*05:10/DQB1*04:06 (194), HLA-DQA1*05:10/DQB1*04:01 (194),</p> |  |
|--|-----------------------------------------------------------------------------------------------------------------------------------------------------------------------------------------------------------------------------------------------------------------------------------------------------------------------------------------------------------------------------------------------------------------------------------------------------------------------------------------------------------------------------------------------------------------------------------------------------------------------------------------------------------------------------------------------------------------------------------------------------------------------------------------------------------------------------------------------------------------------------------------------------------------------------------------------------------------------------------------------------------------------------------------------------------------------------------------------------------------------------------------------------------------------------------------------------------------------------------------------------------------------------------------------------------------------------------------------------------------------------------------------------------------------------------------------------------------------------------------------------------------------------------------------------------------------------------------------------------------------------------------------------------------------------------------------------------------------------------------------------------------------------------------------------------------------------------------------------------------------------------------------------------------------------------------------------------------------------------------------------------------------------------------------------------------------------------------------------------------------------------------------------------------------------------------------------------------------------------------------------------------------------------------------------------------------------------------------------------------------------------------------------------------------------------------------------------------------------------------------------------------------------------------------------------------------------------------------------------------------------------------------------------------------------------------------------------------------------------------------------------------------------------------------------------------------------------------------------------------------------------------------------------------------------------------------------------------------------------------------------------------------------------------------------------------------------------------------------------------------------------------------|--|

|                     |                                                                                                                                                                                                                                                                                                                                                                                                                                                                                                                                                                                                                                                                                                                                                                                                                                                                                                                                                                                                                                                                                                                                                                                                                                                                                                                                                                                                                                                                                                                                                                                                                                                                                                                                                                                                                                                                                                                                                                                                                                                                                                                                                                                                                                                                                                                                                                                                                                                                                                                         |               |
|---------------------|-------------------------------------------------------------------------------------------------------------------------------------------------------------------------------------------------------------------------------------------------------------------------------------------------------------------------------------------------------------------------------------------------------------------------------------------------------------------------------------------------------------------------------------------------------------------------------------------------------------------------------------------------------------------------------------------------------------------------------------------------------------------------------------------------------------------------------------------------------------------------------------------------------------------------------------------------------------------------------------------------------------------------------------------------------------------------------------------------------------------------------------------------------------------------------------------------------------------------------------------------------------------------------------------------------------------------------------------------------------------------------------------------------------------------------------------------------------------------------------------------------------------------------------------------------------------------------------------------------------------------------------------------------------------------------------------------------------------------------------------------------------------------------------------------------------------------------------------------------------------------------------------------------------------------------------------------------------------------------------------------------------------------------------------------------------------------------------------------------------------------------------------------------------------------------------------------------------------------------------------------------------------------------------------------------------------------------------------------------------------------------------------------------------------------------------------------------------------------------------------------------------------------|---------------|
|                     | HLA-DQA1*05:11/DQB1*04:01 (194), HLA-DQA1*05:11/DQB1*04:06 (194)                                                                                                                                                                                                                                                                                                                                                                                                                                                                                                                                                                                                                                                                                                                                                                                                                                                                                                                                                                                                                                                                                                                                                                                                                                                                                                                                                                                                                                                                                                                                                                                                                                                                                                                                                                                                                                                                                                                                                                                                                                                                                                                                                                                                                                                                                                                                                                                                                                                        |               |
| NIVNVSLVKPSF<br>YVY | HLA-DRB1*12:05 (181.5), HLA-DRB1*12:01 (181.5), HLA-DRB1*12:06 (181.53), HLA-DRB1*12:07 (181.53), HLA-DRB1*12:14 (181.53), HLA-DRB1*12:10 (181.53), HLA-DRB1*12:17 (181.53), HLA-DRB1*12:11 (165.49), HLA-DRB1*12:12 (142.3), HLA-DRB1*12:03 (111.95), HLA-DRB5*02:05 (88.26), HLA-DRB1*08:07 (137.52), HLA-DRB1*07:11 (65.78), HLA-DRB1*14:17 (56.76), HLA-DRB1*07:04 (93.31), HLA-DRB1*11:13 (63.92), HLA-DRB1*13:17 (85.45), HLA-DRB1*13:09 (133.61), HLA-DRB3*03:01 (44.46), HLA-DRB1*07:01 (94.61), HLA-DRB1*07:05 (94.61), HLA-DRB1*07:03 (94.61), HLA-DRB1*07:07 (94.61), HLA-DRB1*07:12 (86.51), HLA-DRB1*07:13 (94.61), HLA-DRB1*07:08 (94.61), HLA-DRB1*07:16 (94.61), HLA-DRB1*07:15 (94.61), HLA-DRB1*07:19 (94.61), HLA-DRB1*07:14 (94.61), HLA-DRB1*15:06 (129.68), HLA-DRB1*15:13 (129.68), HLA-DRB1*15:01 (129.68), HLA-DRB1*15:09 (129.68), HLA-DRB1*15:20 (129.68), HLA-DRB1*15:16 (129.68), HLA-DRB1*15:24 (129.68), HLA-DRB1*15:22 (129.68), HLA-DRB1*11:02 (65.44), HLA-DRB1*11:16 (65.44), HLA-DRB1*13:01 (65.44), HLA-DRB1*13:22 (65.44), HLA-DRB1*14:06 (170.5), HLA-DRB1*14:21 (55.77), HLA-DRB1*14:20 (170.5), HLA-DRB1*11:18 (126), HLA-DRB1*13:06 (126), HLA-DRB1*14:16 (93.18), HLA-DRB1*15:10 (181.64), HLA-DRB1*13:15 (139.32), HLA-DRB1*07:09 (121.98), HLA-DRB1*15:05 (87.7), HLA-DRB5*01:04 (130.33), HLA-DRB1*09:05 (119.96), HLA-DRB1*13:08 (139.41), HLA-DRB1*11:08 (156.48), HLA-DRB1*13:04 (111.9), HLA-DRB1*13:20 (47.69), HLA-DRB4*01:07 (185.07), HLA-DRB4*01:06 (185.07), HLA-DRB4*01:01 (185.07), HLA-DRB4*01:08 (185.07), HLA-DRB4*01:03 (185.07), HLA-DRB1*11:20 (159.19), HLA-DRB1*11:14 (159.19), HLA-DRB1*13:02 (159.19), HLA-DRB1*13:23 (159.19), HLA-DRB1*01:04 (84.48), HLA-DRB1*09:07 (154), HLA-DRB1*09:01 (168.8), HLA-DRB1*09:09 (168.8), HLA-DRB1*01:13 (29.72), HLA-DRB1*01:14 (66.92), HLA-DRB1*01:18 (40.32), HLA-DRB1*16:10 (174.38), HLA-DRB1*01:11 (77.71), HLA-DRB1*01:20 (117.69), HLA-DRB1*01:24 (146.8), HLA-DRB1*10:02 (122.79), HLA-DRB5*01:01 (187.57), HLA-DRB5*01:14 (187.57), HLA-DRB5*01:13 (187.57), HLA-DRB5*01:05 (187.57), HLA-DRB1*01:05 (67.51), HLA-DRB1*01:07 (67.51), HLA-DRB1*01:08 (67.51), HLA-DRB1*01:01 (67.51), HLA-DRB1*01:12 (67.51), HLA-DRB1*01:10 (100.15), HLA-DRB1*01:25 (67.51), HLA-DRB1*01:22 (67.51), HLA-DRB1*01:19 (67.51), HLA-DRB1*01:21 (175.09), HLA-DRB1*10:01 (113.81), HLA-DRB1*10:03 (113.81), HLA-DPA1*04:01/DPB1*08:01 (199.75), HLA-DQA1*01:03/DQB1*05:12 (166.52), HLA-DQA1*01:03/DQB1*05:01 (154.97) | 98<br>(66.39) |

**Table S4:** The potential CD8+ T-cell epitopes of Membrane glycoprotein and their respective MHC class I alleles with IC50 < 250 nM.

| Peptide    | allele                                                                                                                                                                      | Allele no |
|------------|-----------------------------------------------------------------------------------------------------------------------------------------------------------------------------|-----------|
| ATSRTLSTYY | HLA-C*12:03 (31.57), HLA-C*03:03 (32.18), HLA-A*30:02 (72.69), HLA-A*11:01 (141.35), HLA-A*29:02 (145.47), HLA-A*01:01 (177.64), HLA-C*14:02 (197.52), HLA-B*15:02 (220.92) | 8         |
| GLMWLSYFI  | HLA-A*02:01 (5.15), HLA-A*02:06 (35.61), HLA-C*12:03 (43.27), HLA-A*32:01 (44.15), HLA-C*14:02 (157.26)                                                                     | 5         |
| AVILRGHLR  | HLA-A*31:01 (27.45), HLA-C*12:03 (41.04), HLA-C*03:03 (41.75), HLA-A*68:01 (95.17), HLA-C*07:01 (152.11), HLA-A*11:01 (157.87)                                              | 6         |
| RYRIGNYKL  | HLA-C*14:02 (36.03), HLA-C*12:03 (65.04), HLA-A*30:01 (70.46), HLA-C*07:02 (78.37), HLA-B*15:02 (78.75), HLA-A*23:01 (180.89)                                               | 6         |
| FAAYSRYRI  | HLA-C*03:03 (4.33), HLA-C*12:03 (32.59), HLA-A*68:02 (41.08), HLA-B*15:02 (47.99)                                                                                           | 4         |
| ELKKLLEQW  | HLA-C*12:03 (9.89), HLA-C*14:02 (162.04),                                                                                                                                   | 2         |
| SRYRIGNYK  | HLA-C*14:02 (20.64), HLA-C*12:03 (33.05), HLA-C*03:03 (38.51), HLA-C*07:01 (39.46), HLA-B*27:05 (108.54), HLA-C*07:02 (187.57)                                              | 6         |
| SFNPETNIL  | HLA-C*07:02 (51.66), HLA-C*14:02 (85.83), HLA-C*12:03 (103.56), HLA-B*15:02 (165.66), HLA-C*03:03 (219.08)                                                                  | 5         |
| KEITVATSR  | HLA-C*12:03 (28.99), HLA-C*03:03 (166.19)                                                                                                                                   | 2         |
| KLIFLWLLW  | HLA-B*58:01 (11.46), HLA-A*32:01 (22.54), HLA-C*12:03 (43.17), HLA-B*57:01 (56.47)                                                                                          | 4         |
| WLSYFIASF  | HLA-C*03:03 (16.28), HLA-B*15:01 (57.28), HLA-C*12:03 (85.55), HLA-B*15:02 (134.66), HLA-A*32:01 (181.53)                                                                   | 5         |

**Table S5:** The potential CD4+ T-cell epitopes of Membrane glycoprotein and their respective MHC class II alleles with IC50 < 200 nM.

| Peptide                     | Alleles                                                                                                                                                                                                                                                                                                                                                                                                                                                                                                                                                                                        | Number of Alleles (Predivac Score) |
|-----------------------------|------------------------------------------------------------------------------------------------------------------------------------------------------------------------------------------------------------------------------------------------------------------------------------------------------------------------------------------------------------------------------------------------------------------------------------------------------------------------------------------------------------------------------------------------------------------------------------------------|------------------------------------|
| <b>VIGAVILRG<br/>HLRIAG</b> | HLA-DRB1*13:20 (13.15), HLA-DRB1*11:02 (19.69), HLA-DRB1*11:16 (19.69), HLA-DRB1*13:01 (19.69), HLA-DRB1*13:22 (19.69), HLA-DRB1*13:04 (24.22), HLA-DRB1*14:21 (28.03), HLA-DRB1*01:04 (28.08), HLA-DRB1*01:20 (28.89), HLA-DRB1*11:03 (29.02), HLA-DRB1*13:24 (29.02), HLA-DRB1*01:18 (30.69), HLA-DRB1*01:13 (34.65), HLA-DRB1*14:16 (35.12), HLA-DRB1*11:18 (37.03), HLA-DRB1*13:06 (37.03), HLA-DRB1*11:25 (37.76), HLA-DRB1*13:18 (37.76), HLA-DRB1*13:08 (41.6), HLA-DRB1*11:04 (43.45), HLA-DRB1*13:11 (43.45), HLA-DRB1*15:05 (44.96), HLA-DRB5*01:01 (48.64), HLA-DRB5*01:14 (48.64), | 119<br>(63.42)                     |

|                             |                                                                                                                                                                                                                                                                                                                                                                                                                                                                                                                                                                                                                                                                                                                                                                                                                                                                                                                                                                                                                                                                                                                                                                                                                                                                                                                                                                                                                                                                                                                                                                                                                                                                                                                                                                                                                                                                                                                                                                                                                                                                                                                                                                                                                                                                                                                                                                                                                             |            |
|-----------------------------|-----------------------------------------------------------------------------------------------------------------------------------------------------------------------------------------------------------------------------------------------------------------------------------------------------------------------------------------------------------------------------------------------------------------------------------------------------------------------------------------------------------------------------------------------------------------------------------------------------------------------------------------------------------------------------------------------------------------------------------------------------------------------------------------------------------------------------------------------------------------------------------------------------------------------------------------------------------------------------------------------------------------------------------------------------------------------------------------------------------------------------------------------------------------------------------------------------------------------------------------------------------------------------------------------------------------------------------------------------------------------------------------------------------------------------------------------------------------------------------------------------------------------------------------------------------------------------------------------------------------------------------------------------------------------------------------------------------------------------------------------------------------------------------------------------------------------------------------------------------------------------------------------------------------------------------------------------------------------------------------------------------------------------------------------------------------------------------------------------------------------------------------------------------------------------------------------------------------------------------------------------------------------------------------------------------------------------------------------------------------------------------------------------------------------------|------------|
|                             | <p>HLA-DRB5*01:13 (48.64), HLA-DRB5*01:05 (48.64), HLA-DRB1*01:06 (50.47), HLA-DRB1*11:11 (50.69), HLA-DRB1*01:12 (51.1), HLA-DRB1*01:07 (51.1), HLA-DRB1*01:08 (51.1), HLA-DRB1*01:01 (51.1), HLA-DRB1*01:05 (51.1), HLA-DRB1*01:25 (51.1), HLA-DRB1*01:22 (51.1), HLA-DRB1*01:19 (51.1), HLA-DRB1*11:01 (53.85), HLA-DRB1*11:12 (53.85), HLA-DRB1*11:09 (53.85), HLA-DRB1*11:10 (53.85), HLA-DRB1*11:15 (53.85), HLA-DRB1*11:24 (53.85), HLA-DRB1*11:29 (53.85), HLA-DRB1*11:28 (53.85), HLA-DRB1*13:05 (53.85), HLA-DRB1*13:14 (53.85), HLA-DRB1*10:02 (54.24), HLA-DRB1*08:20 (59.28), HLA-DRB1*15:10 (61.63), HLA-DRB1*11:21 (63.33), HLA-DRB1*01:10 (65.7), HLA-DRB5*01:02 (66.33), HLA-DRB5*01:08N (66.33), HLA-DRB1*01:14 (67.58), HLA-DRB5*01:04 (67.97), HLA-DRB1*08:04 (69.82), HLA-DRB1*14:15 (69.82), HLA-DRB1*13:21 (71.34), HLA-DRB1*13:19 (71.92), HLA-DRB4*01:07 (77.62), HLA-DRB4*01:06 (77.62), HLA-DRB4*01:01 (77.62), HLA-DRB4*01:08 (77.62), HLA-DRB4*01:03 (77.62), HLA-DRB1*15:06 (78.36), HLA-DRB1*15:13 (78.36), HLA-DRB1*15:01 (78.36), HLA-DRB1*15:09 (78.36), HLA-DRB1*15:20 (78.36), HLA-DRB1*15:16 (78.36), HLA-DRB1*15:24 (78.36), HLA-DRB1*15:22 (78.36), HLA-DRB1*08:06 (81.87), HLA-DRB1*15:04 (82.42), HLA-DRB1*01:11 (82.68), HLA-DRB1*11:05 (82.76), HLA-DRB1*11:27 (85.69), HLA-DRB1*14:06 (96.9), HLA-DRB1*14:20 (96.9), HLA-DRB1*01:02 (98.37), HLA-DRB1*15:18 (101.24), HLA-DRB1*14:25 (102.79), HLA-DRB1*14:22 (102.79), HLA-DRB1*12:03 (104.46), HLA-DRB1*01:09 (106.07), HLA-DRB1*12:19 (109.08), HLA-DRB5*02:05 (110.12), HLA-DRB1*14:12 (114.81), HLA-DRB1*15:21 (116.75), HLA-DRB5*02:04 (123.66), HLA-DRB5*01:03 (125.49), HLA-DRB1*11:06 (126.39), HLA-DRB1*07:11 (131.45), HLA-DRB1*16:09 (132.86), HLA-DRB1*01:24 (133.62), HLA-DRB1*08:01 (138.02), HLA-DRB1*08:16 (138.02), HLA-DRB1*13:07 (138.04), HLA-DRB1*08:05 (139.04), HLA-DRB1*11:08 (141.65), HLA-DRB1*15:07 (150.89), HLA-DRB1*16:10 (150.99), HLA-DRB1*08:08 (151.97), HLA-DRB1*08:11 (151.97), HLA-DRB1*15:23 (155.3), HLA-DRB1*10:01 (155.53), HLA-DRB1*10:03 (155.53), HLA-DRB1*12:12 (155.78), HLA-DRB1*15:15 (158.6), HLA-DRB1*08:10 (159.98), HLA-DRB1*01:21 (167.42), HLA-DRB1*08:24 (171.52), HLA-DRB1*15:12 (176.98), HLA-DRB1*04:13 (184.89), HLA-DRB1*01:17 (190.31), HLA-DRB1*04:02 (194.82), HLA-DRB1*14:01 (195.88) HLA-DPA1*03:02/DPB1*08:01 (187), HLA-DPA1*03:02/DPB1*19:01 (187.58 )</p> |            |
| <b>FAAYSRYRI<br/>GNYKLN</b> | <p>HLA-DRB1*01:13 (53.23), HLA-DRB1*15:05 (84.77), HLA-DRB5*01:01 (113.18), HLA-DRB5*01:14 (113.18), HLA-DRB5*01:13 (113.18), HLA-DRB5*01:05 (113.18), HLA-DRB1*01:18 (125.24), HLA-DRB5*01:02 (133.32), HLA-DRB5*01:08N (133.32), HLA-DRB1*13:04 (150.91), HLA-DRB1*11:11 (152.29), HLA-DRB1*01:10 (156.63), HLA-DRB1*01:12 (162), HLA-DRB1*01:07 (162), HLA-DRB1*01:08 (162), HLA-DRB1*01:01 (162), HLA-DRB1*01:05 (162), HLA-DRB1*01:25 (162), HLA-DRB1*01:22 (162), HLA-DRB1*01:19 (162), HLA-DRB1*15:06 (164.54), HLA-DRB1*15:13 (164.54), HLA-DRB1*15:01 (164.54), HLA-DRB1*15:09 (164.54), HLA-DRB1*15:20 (164.54), HLA-DRB1*15:16 (164.54), HLA-DRB1*15:24 (164.54), HLA-DRB1*15:22 (164.54), HLA-DRB1*07:11 (164.89), HLA-DRB1*01:14 (167.87), HLA-DRB1*14:16 (175.04), HLA-DRB1*14:21 (178.2), HLA-DRB1*14:25 (181.64), HLA-DRB1*14:22 (181.64), HLA-DRB5*01:03 (187.46), HLA-DRB1*11:01 (188.98), HLA-DRB1*11:12 (188.98), HLA-DRB1*11:09 (188.98), HLA-DRB1*11:10 (188.98), HLA-DRB1*11:15 (188.98), HLA-DRB1*11:24 (188.98), HLA-DRB1*11:29 (188.98), HLA-DRB1*11:28 (188.98), HLA-DRB1*13:05 (188.98), HLA-DRB1*13:14 (188.98), HLA-DRB1*11:02 (191.3), HLA-DRB1*11:16 (191.3), HLA-DRB1*13:01 (191.3), HLA-DRB1*13:22 (191.3), HLA-DRB1*01:04 (191.59), HLA-DRB1*10:02 (198.03), HLA-DRB1*09:05 (199.52)</p>                                                                                                                                                                                                                                                                                                                                                                                                                                                                                                                                                                                                                                                                                                                                                                                                                                                                                                                                                                                                                                                                                                 | 52 (63.31) |
| <b>GFAAYSRYR<br/>IGNYKL</b> | <p>HLA-DRB1*01:13 (59.31), HLA-DRB1*15:05 (65.8), HLA-DRB1*15:04 (73.83), HLA-DRB1*15:15 (74.54), HLA-DRB1*13:20 (75.17), HLA-DRB5*01:01 (95.36), HLA-DRB5*01:14 (95.36), HLA-DRB5*01:13 (95.36), HLA-DRB5*01:05 (95.36),</p>                                                                                                                                                                                                                                                                                                                                                                                                                                                                                                                                                                                                                                                                                                                                                                                                                                                                                                                                                                                                                                                                                                                                                                                                                                                                                                                                                                                                                                                                                                                                                                                                                                                                                                                                                                                                                                                                                                                                                                                                                                                                                                                                                                                               | 64 (63.31) |

|                             |                                                                                                                                                                                                                                                                                                                                                                                                                                                                                                                                                                                                                                                                                                                                                                                                                                                                                                                                                                                                                                                                                                                                                                                                                                                                                                                                                                                                                                                                                                                                                                                                                                                                                                                                                                                                                                                                                                                                                                                                                                                                                                                                                                                                                                                               |                |
|-----------------------------|---------------------------------------------------------------------------------------------------------------------------------------------------------------------------------------------------------------------------------------------------------------------------------------------------------------------------------------------------------------------------------------------------------------------------------------------------------------------------------------------------------------------------------------------------------------------------------------------------------------------------------------------------------------------------------------------------------------------------------------------------------------------------------------------------------------------------------------------------------------------------------------------------------------------------------------------------------------------------------------------------------------------------------------------------------------------------------------------------------------------------------------------------------------------------------------------------------------------------------------------------------------------------------------------------------------------------------------------------------------------------------------------------------------------------------------------------------------------------------------------------------------------------------------------------------------------------------------------------------------------------------------------------------------------------------------------------------------------------------------------------------------------------------------------------------------------------------------------------------------------------------------------------------------------------------------------------------------------------------------------------------------------------------------------------------------------------------------------------------------------------------------------------------------------------------------------------------------------------------------------------------------|----------------|
|                             | HLA-DRB1*11:03 (101.03), HLA-DRB1*13:24 (101.03), HLA-DRB1*13:21 (102.94), HLA-DRB5*01:02 (105.89), HLA-DRB5*01:08N (105.89), HLA-DRB1*11:11 (113.84), HLA-DRB1*13:04 (117.84), HLA-DRB1*15:06 (127.61), HLA-DRB1*15:13 (127.61), HLA-DRB1*15:01 (127.61), HLA-DRB1*15:09 (127.61), HLA-DRB1*15:20 (127.61), HLA-DRB1*15:16 (127.61), HLA-DRB1*15:24 (127.61), HLA-DRB1*15:22 (127.61), HLA-DRB1*16:09 (127.66), HLA-DRB1*14:25 (129.22), HLA-DRB1*14:22 (129.22), HLA-DRB5*01:03 (130.37), HLA-DRB1*11:01 (130.44), HLA-DRB1*11:12 (130.44), HLA-DRB1*11:09 (130.44), HLA-DRB1*11:10 (130.44), HLA-DRB1*11:15 (130.44), HLA-DRB1*11:24 (130.44), HLA-DRB1*11:29 (130.44), HLA-DRB1*11:28 (130.44), HLA-DRB1*13:05 (130.44), HLA-DRB1*13:14 (130.44), HLA-DRB1*15:23 (131.1), HLA-DRB1*07:11 (139.2), HLA-DRB1*14:16 (140.73), HLA-DRB1*14:21 (155.86), HLA-DRB1*11:02 (161.76), HLA-DRB1*11:16 (161.76), HLA-DRB1*13:01 (161.76), HLA-DRB1*13:22 (161.76), HLA-DRB1*15:12 (161.94), HLA-DRB1*11:04 (166.51), HLA-DRB1*13:11 (166.51), HLA-DRB1*10:02 (168.26), HLA-DRB1*15:07 (169.81), HLA-DRB1*15:18 (174.61), HLA-DRB1*16:01 (175.13), HLA-DRB1*16:03 (175.13), HLA-DRB1*16:08 (175.13), HLA-DRB1*01:20 (176.67), HLA-DRB5*02:04 (177.53), HLA-DRB5*01:04 (177.89), HLA-DRB1*09:05 (185.83), HLA-DRB1*01:04 (186.97), HLA-DRB1*16:10 (187.8), HLA-DRB1*15:10 (192.03), HLA-DRB1*08:05 (193.87), HLA-DRB1*01:06 (199.73)                                                                                                                                                                                                                                                                                                                                                                                                                                                                                                                                                                                                                                                                                                                                                                                                                                   |                |
| <b>FAAYSRYRI<br/>GNYKLN</b> | HLA-DRB1*13:20 (90.82)                                                                                                                                                                                                                                                                                                                                                                                                                                                                                                                                                                                                                                                                                                                                                                                                                                                                                                                                                                                                                                                                                                                                                                                                                                                                                                                                                                                                                                                                                                                                                                                                                                                                                                                                                                                                                                                                                                                                                                                                                                                                                                                                                                                                                                        | 1 (63.31)      |
| <b>VGLMWLSY<br/>FIASFRL</b> | HLA-DRB1*01:13 (27.47), HLA-DRB1*01:18 (39.16), HLA-DRB1*15:05 (39.94), HLA-DRB1*01:14 (42.04), HLA-DRB1*07:11 (52.03), HLA-DRB1*10:01 (54.28), HLA-DRB1*10:03 (54.28), HLA-DRB1*15:12 (54.59), HLA-DRB1*15:06 (54.82), HLA-DRB1*15:13 (54.82), HLA-DRB1*15:01 (54.82), HLA-DRB1*15:09 (54.82), HLA-DRB1*15:20 (54.82), HLA-DRB1*15:16 (54.82), HLA-DRB1*15:24 (54.82), HLA-DRB1*15:22 (54.82), HLA-DRB1*10:02 (56.13), HLA-DRB1*01:12 (59.75), HLA-DRB1*01:07 (59.75), HLA-DRB1*01:08 (59.75), HLA-DRB1*01:01 (59.75), HLA-DRB1*01:05 (59.75), HLA-DRB1*01:25 (59.75), HLA-DRB1*01:22 (59.75), HLA-DRB1*01:19 (59.75), HLA-DRB1*07:12 (64.62), HLA-DRB1*07:01 (66.14), HLA-DRB1*07:05 (66.14), HLA-DRB1*07:03 (66.14), HLA-DRB1*07:07 (66.14), HLA-DRB1*07:13 (66.14), HLA-DRB1*07:08 (66.14), HLA-DRB1*07:16 (66.14), HLA-DRB1*07:15 (66.14), HLA-DRB1*07:19 (66.14), HLA-DRB1*07:14 (66.14), HLA-DRB1*01:20 (69.78), HLA-DRB1*16:10 (73.01), HLA-DRB1*15:15 (76.16), HLA-DRB1*15:10 (76.34), HLA-DRB1*01:04 (76.68), HLA-DRB1*07:09 (80.7), HLA-DRB1*07:04 (85.42), HLA-DRB1*15:18 (85.68), HLA-DRB1*15:07 (85.91), HLA-DRB1*09:05 (89.58), HLA-DRB1*15:23 (90.11), HLA-DRB1*15:04 (96.12), HLA-DRB1*01:11 (98.28), HLA-DRB1*09:07 (101.43), HLA-DRB1*01:10 (107.37), HLA-DRB1*13:20 (108.14), HLA-DRB5*01:01 (109.43), HLA-DRB5*01:14 (109.43), HLA-DRB5*01:13 (109.43), HLA-DRB5*01:05 (109.43), HLA-DRB1*14:16 (111.84), HLA-DRB1*07:06 (113.27), HLA-DRB1*16:16 (113.39), HLA-DRB1*16:02 (113.39), HLA-DRB1*16:11 (113.39), HLA-DRB1*09:01 (114.82), HLA-DRB1*09:09 (114.82), HLA-DRB1*01:21 (115.4), HLA-DRB1*16:09 (116.69), HLA-DRB1*13:04 (119.75), HLA-DRB1*01:24 (126.29), HLA-DRB1*16:12 (126.82), HLA-DRB1*11:13 (126.83), HLA-DRB1*04:10 (127.6), HLA-DRB1*15:03 (128.74), HLA-DRB1*16:14 (130.34), HLA-DRB1*14:17 (134.9), HLA-DRB5*01:04 (136.65), HLA-DRB5*01:02 (146.5), HLA-DRB5*01:08N (146.5), HLA-DRB1*14:21 (149.84), HLA-DRB1*01:06 (152.36), HLA-DRB5*02:05 (154.56), HLA-DRB1*15:21 (156.02), HLA-DRB1*01:09 (158.89), HLA-DRB1*16:04 (165.91), HLA-DRB1*11:02 (167), HLA-DRB1*11:16 (167), HLA-DRB1*13:01 (167), HLA-DRB1*13:22 (167), HLA-DRB1*15:02 (181.32), HLA-DRB1*15:08 (181.32), HLA-DRB1*15:19 (181.32), HLA-DRB1*15:26 | 164<br>(66.37) |

|  |                                                                                                                                                                                                                                                                                                                                                                                                                                                                                                                                                                                                                                                                                                                                                                                                                                                                                                                                                                                                                                                                                                                                                                                                                                                                                                                                                                                                                                                                                                                                                                                                                                                                                                                                                                                                                                                                                                                                                                                                                                                                                                                                                                                                                                                                                                                                                                                                                                                                                                                                                                                                                                                                   |  |
|--|-------------------------------------------------------------------------------------------------------------------------------------------------------------------------------------------------------------------------------------------------------------------------------------------------------------------------------------------------------------------------------------------------------------------------------------------------------------------------------------------------------------------------------------------------------------------------------------------------------------------------------------------------------------------------------------------------------------------------------------------------------------------------------------------------------------------------------------------------------------------------------------------------------------------------------------------------------------------------------------------------------------------------------------------------------------------------------------------------------------------------------------------------------------------------------------------------------------------------------------------------------------------------------------------------------------------------------------------------------------------------------------------------------------------------------------------------------------------------------------------------------------------------------------------------------------------------------------------------------------------------------------------------------------------------------------------------------------------------------------------------------------------------------------------------------------------------------------------------------------------------------------------------------------------------------------------------------------------------------------------------------------------------------------------------------------------------------------------------------------------------------------------------------------------------------------------------------------------------------------------------------------------------------------------------------------------------------------------------------------------------------------------------------------------------------------------------------------------------------------------------------------------------------------------------------------------------------------------------------------------------------------------------------------------|--|
|  | <p>(181.32), HLA-DRB1*15:14 (181.32), HLA-DRB1*12:03 (188.18), HLA-DRB1*16:01 (191.34), HLA-DRB1*16:03 (191.34), HLA-DRB1*16:08 (191.34), HLA-DPA1*03:02/DPB1*15:01 (28.97), HLA-DPA1*02:02/DPB1*15:01 (33.4), HLA-DPA1*02:04/DPB1*15:01 (33.4), HLA-DPA1*02:04/DPB1*02:01 (34.25), HLA-DPA1*04:01/DPB1*15:01 (40.39), HLA-DPA1*03:03/DPB1*02:01 (44.19), HLA-DPA1*03:02/DPB1*04:01 (44.84), HLA-DPA1*03:02/DPB1*23:01 (44.84), HLA-DPA1*01:03/DPB1*15:01 (45.16), HLA-DPA1*01:04/DPB1*15:01 (45.16), HLA-DPA1*01:05/DPB1*15:01 (45.16), HLA-DPA1*01:07/DPB1*15:01 (45.16), HLA-DPA1*01:08/DPB1*15:01 (45.16), HLA-DPA1*01:09/DPB1*15:01 (45.16), HLA-DPA1*01:10/DPB1*15:01 (45.16), HLA-DPA1*02:03/DPB1*15:01 (45.16), HLA-DPA1*02:02/DPB1*23:01 (45.96), HLA-DPA1*02:04/DPB1*23:01 (45.96), HLA-DPA1*04:01/DPB1*02:01 (46.83), HLA-DPA1*03:01/DPB1*15:01 (48.75), HLA-DPA1*03:03/DPB1*15:01 (48.75), HLA-DPA1*01:03/DPB1*02:01 (48.8), HLA-DPA1*01:07/DPB1*02:01 (48.8), HLA-DPA1*01:08/DPB1*02:01 (48.8), HLA-DPA1*01:09/DPB1*02:01 (48.8), HLA-DPA1*01:10/DPB1*02:01 (48.8), HLA-DPA1*02:03/DPB1*02:01 (48.8), HLA-DPA1*01:06/DPB1*15:01 (49.93), HLA-DPA1*02:01/DPB1*15:01 (49.93), HLA-DPA1*01:06/DPB1*02:01 (55.01), HLA-DPA1*02:01/DPB1*02:01 (55.01), HLA-DPA1*04:01/DPB1*04:01 (64.32), HLA-DPA1*04:01/DPB1*23:01 (64.32), HLA-DPA1*03:01/DPB1*04:01 (74.24), HLA-DPA1*03:01/DPB1*23:01 (74.24), HLA-DPA1*03:03/DPB1*04:01 (74.24), HLA-DPA1*03:03/DPB1*23:01 (74.24), HLA-DPA1*01:03/DPB1*04:01 (74.24), HLA-DPA1*01:04/DPB1*04:01 (74.24), HLA-DPA1*01:05/DPB1*04:01 (74.24), HLA-DPA1*01:08/DPB1*04:01 (74.24), HLA-DPA1*01:10/DPB1*23:01 (74.24), HLA-DPA1*02:03/DPB1*23:01 (74.24), HLA-DPA1*02:01/DPB1*04:01 (75.37), HLA-DPA1*02:01/DPB1*23:01 (75.37), HLA-DPA1*02:02/DPB1*04:02 (101.17), HLA-DPA1*02:04/DPB1*04:02 (101.17), HLA-DPA1*01:06/DPB1*04:02 (157.61), HLA-DPA1*01:07/DPB1*04:02 (183.21), HLA-DPA1*01:09/DPB1*04:02 (183.21), HLA-DPA1*01:10/DPB1*04:02 (183.21), HLA-DPA1*02:03/DPB1*04:02 (183.21), HLA-DQA1*05:01/DQB1*05:01 (86.13), HLA-DQA1*05:03/DQB1*05:01 (86.13), HLA-DQA1*05:04/DQB1*05:01 (86.13), HLA-DQA1*05:05/DQB1*05:01 (86.13), HLA-DQA1*05:06/DQB1*05:01 (86.13), HLA-DQA1*05:07/DQB1*05:01 (86.13), HLA-DQA1*05:08/DQB1*05:01 (86.13), HLA-DQA1*05:10/DQB1*05:01 (86.13), HLA-DQA1*05:09/DQB1*05:01 (86.13), HLA-DQA1*05:11/DQB1*05:01 (86.13), HLA-DQA1*01:01/DQB1*05:07 (144.01), HLA-DQA1*01:01/DQB1*05:01 (144.01), HLA-DQA1*01:04/DQB1*05:01 (144.01), HLA-DQA1*01:05/DQB1*05:01 (144.01), HLA-DQA1*01:07/DQB1*05:01 (144.01), HLA-DQA1*06:01/DQB1*05:01 (196.08), HLA-DQA1*06:02/DQB1*05:01 (196.08)</p> |  |
|--|-------------------------------------------------------------------------------------------------------------------------------------------------------------------------------------------------------------------------------------------------------------------------------------------------------------------------------------------------------------------------------------------------------------------------------------------------------------------------------------------------------------------------------------------------------------------------------------------------------------------------------------------------------------------------------------------------------------------------------------------------------------------------------------------------------------------------------------------------------------------------------------------------------------------------------------------------------------------------------------------------------------------------------------------------------------------------------------------------------------------------------------------------------------------------------------------------------------------------------------------------------------------------------------------------------------------------------------------------------------------------------------------------------------------------------------------------------------------------------------------------------------------------------------------------------------------------------------------------------------------------------------------------------------------------------------------------------------------------------------------------------------------------------------------------------------------------------------------------------------------------------------------------------------------------------------------------------------------------------------------------------------------------------------------------------------------------------------------------------------------------------------------------------------------------------------------------------------------------------------------------------------------------------------------------------------------------------------------------------------------------------------------------------------------------------------------------------------------------------------------------------------------------------------------------------------------------------------------------------------------------------------------------------------------|--|

**Table S6:** The potential CD8+ T-cell epitopes of S1 domain of Spike surface glycoprotein and their respective MHC class I alleles with IC50 < 250 nM.

| Peptide    | Allele                                                                                                                                                                                           | Allele no |
|------------|--------------------------------------------------------------------------------------------------------------------------------------------------------------------------------------------------|-----------|
| CVADYSVLY  | HLA-A*29:02 (19.22), HLA-B*35:01 (45.04), HLA-C*12:03 (54.23), HLA-C*03:03 (57.62), HLA-C*07:01 (138.73), HLA-A*68:01 (217.52), HLA-A*30:02 (224.63), HLA-A*26:01 (225.74), HLA-B*15:02 (245.04) | 09        |
| KIADYNYKL  | HLA-A*02:01 (38.82), HLA-A*32:01 (53.20), HLA-A*02:06 (101.99), HLA-C*12:03 (108.95), HLA-B*15:02 (134.97), HLA-C*15:02 (193.38), HLA-C*03:03 (202.12)                                           | 07        |
| SVYAWNRRK  | HLA-C*12:03 (26.25), HLA-A*31:01 (29.96), HLA-C*03:03 (36.61), HLA-A*68:01 (67.53), HLA-C*07:01 (104.75), HLA-C*14:02 (120.68), HLA-A*11:01 (185.05)                                             | 07        |
| PYRVVLSF   | HLA-C*14:02 (9.45), HLA-A*23:01 (46.71), HLA-C*12:03 (61.97), HLA-C*07:02 (66.86), HLA-B*15:02 (173.87), HLA-A*24:02 (193.92)                                                                    | 06        |
| RISNCVADY  | HLA-C*12:03 (23.62), HLA-C*03:03 (30.95), HLA-A*30:02 (54.89), HLA-C*05:01 (182.25), HLA-A*29:02 (231.61)                                                                                        | 05        |
| GEVFNATRF  | HLA-C*03:03 (49.27), HLA-C*12:03 (92.09), HLA-B*40:01 (93.30), HLA-B*15:02 (217.39)                                                                                                              | 04        |
| APATVCGPK  | HLA-C*03:03 (22.32), HLA-C*12:03 (59.46), HLA-A*11:01 (163.04)                                                                                                                                   | 03        |
| TRFASVYAW  | HLA-C*12:03 (14.46), HLA-C*07:01 (33.13), HLA-C*03:03 (56.57), HLA-C*14:02 (64.36), HLA-B*39:01 (71.02), HLA-C*06:02 (137.03), HLA-B*58:01 (197.38), HLA-C*07:02 (204.72)                        | 08        |
| IRGDEVQRQI | HLA-C*07:01 (16.64), HLA-C*12:03 (36.41), HLA-C*03:03 (54.90), HLA-C*07:02 (58.23), HLA-C*06:02 (70.93)                                                                                          | 05        |
| ASFSTFKCY  | HLA-C*12:03 (9.75), HLA-C*03:03 (49.05), HLA-A*30:02 (111.29), HLA-B*15:01 (124.17), HLA-C*07:01 (183.30), HLA-C*14:02 (205.88), HLA-B*15:02 (228.68)                                            | 07        |
| GQTGKIADY  | HLA-C*03:03 (15.69), HLA-C*12:03 (36.08), HLA-A*30:02 (157.93)                                                                                                                                   | 03        |

**Table S7:** The potential CD4+ T-cell epitopes of S1 domain of Spike surface glycoprotein and their respective MHC class II alleles with IC50 < 200 nM.

| Peptide          | Alleles                                                                                                                                                                                                                                                                                                                                                                                                                                                                                                                                                        | Number of Alleles (Prediva c Score) |
|------------------|----------------------------------------------------------------------------------------------------------------------------------------------------------------------------------------------------------------------------------------------------------------------------------------------------------------------------------------------------------------------------------------------------------------------------------------------------------------------------------------------------------------------------------------------------------------|-------------------------------------|
| ISNCVADYS VLYNSA | HLA-DRB3*01:14 (91.14), HLA-DRB3*01:05 (82.26), HLA-DRB3*01:12 (71.47), HLA-DRB3*01:11 (71.47), HLA-DRB3*01:08 (71.47), HLA-DRB3*01:04 (71.47), HLA-DRB3*01:01 (71.47), HLA-DRB1*03:14 (185.26), HLA-DRB1*03:10 (126.96), HLA-DRB1*03:01 (180.92), HLA-DRB1*03:04 (180.92), HLA-DRB1*03:18 (180.92), HLA-DRB1*03:13 (180.92), HLA-DRB1*03:08 (180.92), HLA-DRB1*03:23 (180.92), HLA-DRB1*03:25 (180.92), HLA-DRB1*03:22 (180.92), HLA-DRB1*03:11 (86.53), HLA-DRB1*07:04 (186.08), HLA-DRB3*03:01 (197.16), HLA-DRB1*01:13 (166.15), HLA-DQA1*01:02/DQB1*05:01 | 25 (72.88)                          |

|                              |                                                                                                                                                                                                                                                                                                                                                                                                                                                                                                                                                                                                                                                                                                                                                                                                                                                                                                                                                                                                                                                                                                                                                                                                                                                                                                                                                                                                                                                                                                                                                                                                           |               |
|------------------------------|-----------------------------------------------------------------------------------------------------------------------------------------------------------------------------------------------------------------------------------------------------------------------------------------------------------------------------------------------------------------------------------------------------------------------------------------------------------------------------------------------------------------------------------------------------------------------------------------------------------------------------------------------------------------------------------------------------------------------------------------------------------------------------------------------------------------------------------------------------------------------------------------------------------------------------------------------------------------------------------------------------------------------------------------------------------------------------------------------------------------------------------------------------------------------------------------------------------------------------------------------------------------------------------------------------------------------------------------------------------------------------------------------------------------------------------------------------------------------------------------------------------------------------------------------------------------------------------------------------------|---------------|
|                              | (141.24), HLA-DQA1*01:06/DQB1*05:01 (141.24), HLA-DQA1*01:08/DQB1*05:01 (141.24), HLA-DQA1*01:09/DQB1*05:01 (141.24)                                                                                                                                                                                                                                                                                                                                                                                                                                                                                                                                                                                                                                                                                                                                                                                                                                                                                                                                                                                                                                                                                                                                                                                                                                                                                                                                                                                                                                                                                      |               |
| <b>FASVYAWN<br/>RKRISNC</b>  | HLA-DRB5*01:03 (89.00), HLA-DRB5*01:01 (43.04), HLA-DRB5*01:14 (43.04), HLA-DRB5*01:13 (43.04), HLA-DRB5*01:05 (43.04), HLA-DRB5*01:02 (56.92), HLA-DRB5*01:08 (56.92), HLA-DRB5*01:04 (91.49),<br>HLA-DRB5*02:05 (198.19), HLA-DRB1*01:20 (140.43), HLA-DRB1*01:04 (126.64)                                                                                                                                                                                                                                                                                                                                                                                                                                                                                                                                                                                                                                                                                                                                                                                                                                                                                                                                                                                                                                                                                                                                                                                                                                                                                                                              | 11<br>(81.51) |
| <b>NRKRISNCV<br/>ADYSVL</b>  | HLA-DRB1*11:20 (192.31), HLA-DRB1*11:14 (192.31), HLA-DRB1*13:02 (192.31), HLA-DRB1*13:23 (192.31), HLA-DRB3*03:01 (69.9)                                                                                                                                                                                                                                                                                                                                                                                                                                                                                                                                                                                                                                                                                                                                                                                                                                                                                                                                                                                                                                                                                                                                                                                                                                                                                                                                                                                                                                                                                 | 5<br>(72.88)  |
| <b>FNATRFASV<br/>YAWN RK</b> | HLA-DPA1*04:01/DPB1*06:01 (196.22), HLA-DPA1*03:02/DPB1*13:01 (199.34), HLA-DQA1*01:03/DQB1*04:01 (182.97), HLA-DQA1*02:01/DQB1*04:01 (162.82), HLA-DQA1*02:01/DQB1*04:06 (162.82), HLA-DQA1*02:01/DQB1*03:01 (85.57), HLA-DQA1*05:01/DQB1*04:01 (100.98), HLA-DQA1*05:01/DQB1*04:06 (100.98), HLA-DQA1*05:03/DQB1*04:06 (100.98), HLA-DQA1*05:03/DQB1*04:01 (100.98), HLA-DQA1*05:04/DQB1*04:01 (100.98), HLA-DQA1*05:04/DQB1*04:06 (100.98), HLA-DQA1*05:05/DQB1*04:06 (100.98), HLA-DQA1*05:05/DQB1*04:01 (100.98), HLA-DQA1*05:06/DQB1*04:06 (100.98), HLA-DQA1*05:06/DQB1*04:01 (100.98), HLA-DQA1*05:07/DQB1*04:01 (100.98), HLA-DQA1*05:07/DQB1*04:06 (100.98), HLA-DQA1*05:08/DQB1*04:01 (100.98), HLA-DQA1*05:09/DQB1*04:06 (100.98), HLA-DQA1*05:09/DQB1*04:01 (100.98), HLA-DQA1*05:08/DQB1*04:06 (100.98), HLA-DQA1*05:10/DQB1*04:06 (100.98), HLA-DQA1*05:10/DQB1*04:01 (100.98), HLA-DQA1*05:11/DQB1*04:01 (100.98), HLA-DQA1*05:11/DQB1*04:06 (100.98), HLA-DQA1*01:03/DQB1*06:01 (197.72), HLA-DQA1*02:01/DQB1*06:01 (152.09), HLA-DQA1*01:03/DQB1*03:01 (114.98), HLA-DQA1*05:01/DQB1*03:01 (177.79), HLA-DQA1*05:03/DQB1*03:01 (177.79), HLA-DQA1*05:04/DQB1*03:01 (177.79), HLA-DQA1*05:05/DQB1*03:01 (177.79), HLA-DQA1*05:06/DQB1*03:01 (177.79), HLA-DQA1*05:07/DQB1*03:01 (177.79), HLA-DQA1*05:08/DQB1*03:01 (177.79), HLA-DQA1*05:09/DQB1*03:01 (177.79), HLA-DQA1*05:10/DQB1*03:01 (177.79), HLA-DQA1*05:11/DQB1*03:01 (177.79), HLA-DQA1*01:02/DQB1*05:01 (173.73), HLA-DQA1*01:06/DQB1*05:01 (173.73), HLA-DQA1*01:08/DQB1*05:01 (173.73), HLA-DQA1*01:09/DQB1*05:01 (173.73) | 43<br>(81.51) |
| <b>ADSFVIRGD<br/>EVRQIA</b>  | HLA-DRB1*01:11 (153.51), HLA-DRB1*01:13 (124.48), HLA-DRB1*01:18 (178.8), HLA-DRB1*03:01 (51.75), HLA-DRB1*03:04 (51.75), HLA-DRB1*03:05 (155.24), HLA-DRB1*03:06 (117.43), HLA-DRB1*03:07 (134.41), HLA-DRB1*03:08 (51.75), HLA-DRB1*03:10 (45.78), HLA-DRB1*03:11 (25.08), HLA-DRB1*03:13 (51.75), HLA-DRB1*03:14 (114.28), HLA-DRB1*03:15 (75.52), HLA-DRB1*03:17 (156.61), HLA-DRB1*03:18 (51.75), HLA-DRB1*03:19 (72.02), HLA-                                                                                                                                                                                                                                                                                                                                                                                                                                                                                                                                                                                                                                                                                                                                                                                                                                                                                                                                                                                                                                                                                                                                                                       | 50<br>(64.85) |

|  |                                                                                                                                                                                                                                                                                                                                                                                                                                                                                                                                                                                                                                                                                                                                                                                                                                                                                      |  |
|--|--------------------------------------------------------------------------------------------------------------------------------------------------------------------------------------------------------------------------------------------------------------------------------------------------------------------------------------------------------------------------------------------------------------------------------------------------------------------------------------------------------------------------------------------------------------------------------------------------------------------------------------------------------------------------------------------------------------------------------------------------------------------------------------------------------------------------------------------------------------------------------------|--|
|  | <p>DRB1*03:20 (135.26), HLA-DRB1*03:21 (134.41), HLA-DRB1*03:22 (51.75), HLA-DRB1*03:23 (51.75), HLA-DRB1*03:24 (57.18), HLA-DRB1*03:25 (51.75), HLA-DRB1*03:26 (117.43), HLA-DRB1*07:04 (142.56), HLA-DRB1*11:07 (134.41), HLA-DRB1*11:13 (147.3), HLA-DRB1*11:14 (115.74), HLA-DRB1*11:20 (115.74), HLA-DRB1*13:02 (115.74), HLA-DRB1*13:16 (149.89), HLA-DRB1*13:20 (179.83), HLA-DRB1*13:23 (115.74), HLA-DRB1*14:09 (184.47), HLA-DRB1*14:17 (105.14), HLA-DRB1*14:21 (71.86), HLA-DRB3*01:01 (70.36), HLA-DRB3*01:04 (70.36), HLA-DRB3*01:05 (73.96), HLA-DRB3*01:08 (70.36), HLA-DRB3*01:11 (70.36), HLA-DRB3*01:12 (70.36), HLA-DRB3*01:14 (81.82), HLA-DRB3*03:01 (60.24), HLA-DRB4*01:04 (152.6), HLA-DRB5*02:05 (157), HLA-DQA1*01:02/DQB1*05:01 (179.51), HLA-DQA1*01:06/DQB1*05:01 (179.51), HLA-DQA1*01:08/DQB1*05:01 (179.51), HLA-DQA1*01:09/DQB1*05:01 (179.51)</p> |  |
|--|--------------------------------------------------------------------------------------------------------------------------------------------------------------------------------------------------------------------------------------------------------------------------------------------------------------------------------------------------------------------------------------------------------------------------------------------------------------------------------------------------------------------------------------------------------------------------------------------------------------------------------------------------------------------------------------------------------------------------------------------------------------------------------------------------------------------------------------------------------------------------------------|--|

**Table S8:** The potential CD8+ T-cell epitopes of S2 domain of Spike surface glycoprotein and their respective MHC class I alleles with IC50 < 250 nM.

| Peptides  | HLA                                                                                                                                                   | No. of Alleles |
|-----------|-------------------------------------------------------------------------------------------------------------------------------------------------------|----------------|
| LTDEMIAQY | HLA-C*12:03 (6.50), HLA-C*05:01 (10.51), HLA-A*01:01 (67.07), HLA-C*14:02 (178.08)                                                                    | 4              |
| FIAGLIAIV | HLA-A*02:06 (12.46), HLA-A*68:02 (17.48), HLA-A*02:01 (20.19), HLA-C*12:03 (33.82), HLA-C*03:03 (58.83)                                               | 5              |
| VTYVPAQEK | HLA-C*03:03 (9.41), HLA-C*15:02 (19.34), HLA-C*12:03 (26.25), HLA-C*14:02 (29.21), HLA-A*11:01 (53), HLA-A*03:01 (107.1), HLA-A*30:01 (223.34)        | 7              |
| VYDPLQPEL | HLA-C*14:02 (4.79), HLA-C*07:02 (8.04), HLA-C*12:03 (16.68), HLA-C*08:02 (65.34), HLA-B*15:02 (150.39), HLA-C*06:02 (220.19)                          | 6              |
| GTITSGWTF | HLA-C*03:03 (45.46), HLA-C*12:03 (70.50), HLA-B*58:01 (91.47), HLA-B*15:02 (145.29)                                                                   | 4              |
| AEIRASANL | HLA-C*03:03 (11.98), HLA-B*40:01 (25.87), HLA-B*15:02 (55.88), HLA-C*12:03 (70.02), HLA-B*40:02 (93.51)                                               | 5              |
| SPRRARSVA | HLA-B*07:02 (5.65), HLA-C*12:03 (18.42), HLA-B*15:02 (195.08)                                                                                         | 3              |
| QDKNTQEVF | HLA-C*12:03 (14.39), HLA-C*14:02 (133.54), HLA-B*15:02 (134.66)                                                                                       | 3              |
| GRLQSLQTY | HLA-C*12:03 (41.42), HLA-C*03:03 (88.43), HLA-C*07:01 (98.67), HLA-C*14:02 (121.79), HLA-C*07:02 (126.23), HLA-B*15:02 (128.59), HLA-C*06:02 (159.52) | 7              |
| AHFPREGVF | HLA-C*12:03 (31.2), HLA-C*03:03 (73.89), HLA-C*07:02 (144.6), HLA-B*15:02 (148.33), HLA-C*14:02 (216.58)                                              | 5              |
| QSAPHGVVF | HLA-C*03:03 (35.53), HLA-B*15:01 (60.53), HLA-B*15:02 (76.25), HLA-B*58:01 (106.73), HLA-C*12:03 (122.8), HLA-A*32:01 (185.75), HLA-C*15:02 (201.57)  | 7              |
| LGAENSVAY | HLA-B*35:01 (8.58), HLA-C*03:03 (20.92), HLA-C*12:03 (45.94), HLA-B*15:01 (122.18), HLA-B*15:02 (148.67)                                              | 5              |

**Table S9:** The potential CD4+ T-cell epitopes of S2 domain of Spike surface glycoprotein and their respective MHC class II alleles with IC50 < 200 nM.

| Peptide           | Alleles                                                                                                                                                                                                                                                                                                                                                                                                                                                                                                             | Number of Alleles (Prediva c Score) |
|-------------------|---------------------------------------------------------------------------------------------------------------------------------------------------------------------------------------------------------------------------------------------------------------------------------------------------------------------------------------------------------------------------------------------------------------------------------------------------------------------------------------------------------------------|-------------------------------------|
| IWLGFIA GLIAIVM V | HLA-DRB1*01:24 (96.15), HLA-DRB1*01:14 (56.71), HLA-DRB1*01:21 (111.68), HLA-DRB1*07:09 (177.7), HLA-DRB1*01:18 (46.42), HLA-DRB1*07:04 (176.93), HLA-DRB1*07:12 (178.63), HLA-DRB1*07:11 (143.95), HLA-DRB1*10:01 (92.81), HLA-DRB1*10:03 (92.81), HLA-DRB1*01:13 (37.12), HLA-DRB1*01:11 (95.77), HLA-DRB3*03:01 (92.89), HLA-DRB1*01:05 (73.8), HLA-DRB1*01:07 (73.8), HLA-DRB1*01:08 (73.8), HLA-DRB1*01:01 (73.8), HLA-DRB1*01:12 (73.8), HLA-DRB1*01:25 (73.8), HLA-DRB1*01:22 (73.8), HLA-DRB1*01:19 (73.8), | 38 (81.88)                          |

|                                  |                                                                                                                                                                                                                                                                                                                                                                                                                                                                                                                                                                                                                                                                                                                    |               |
|----------------------------------|--------------------------------------------------------------------------------------------------------------------------------------------------------------------------------------------------------------------------------------------------------------------------------------------------------------------------------------------------------------------------------------------------------------------------------------------------------------------------------------------------------------------------------------------------------------------------------------------------------------------------------------------------------------------------------------------------------------------|---------------|
|                                  | HLA-DRB1*01:10 (188.68), HLA-DPA1*04:01/DPB1*15:01 (123.14), HLA-DPA1*03:01/DPB1*15:01 (196.43), HLA-DPA1*03:03/DPB1*15:01 (196.43), HLA-DPA1*03:02/DPB1*15:01 (134.35), HLA-DPA1*02:02/DPB1*15:01 (172.46), HLA-DPA1*02:04/DPB1*15:01 (172.46), HLA-DQA1*05:01/DQB1*05:01 (175.42), HLA-DQA1*05:03/DQB1*05:01 (175.42), HLA-DQA1*05:04/DQB1*05:01 (175.42), HLA-DQA1*05:05/DQB1*05:01 (175.42), HLA-DQA1*05:06/DQB1*05:01 (175.42), HLA-DQA1*05:07/DQB1*05:01 (175.42), HLA-DQA1*05:08/DQB1*05:01 (175.42), HLA-DQA1*05:10/DQB1*05:01 (175.42), HLA-DQA1*05:09/DQB1*05:01 (175.42), HLA-DQA1*05:11/DQB1*05:01 (175.42),                                                                                           |               |
| <b>FLHVTYV<br/>PAQEKNF<br/>T</b> | HLA-DRB5*01:04 (133.52), HLA-DRB5*02:05 (154.35), HLA-DRB5*01:01 (109.6), HLA-DRB5*01:14 (109.6), HLA-DRB5*01:13 (109.6), HLA-DRB5*01:05 (109.6), HLA-DRB5*01:02 (152.81), HLA-DRB5*01:08 (152.81), HLA-DRB1*10:01 (82.23), HLA-DRB1*10:03 (82.23), HLA-DRB1*01:13 (38.81), HLA-DRB1*10:02 (142.52), HLA-DRB1*01:14 (103.66), HLA-DRB1*01:10 (141.26), HLA-DRB1*01:04 (184.43), HLA-DRB1*14:21 (147.21), HLA-DRB1*01:05 (120.64), HLA-DRB1*01:07 (120.64), HLA-DRB1*01:08 (120.64), HLA-DRB1*01:01 (120.64), HLA-DRB1*01:12 (120.64), HLA-DRB1*01:11 (120.64), HLA-DRB1*01:25 (120.64), HLA-DRB1*01:22 (120.64), HLA-DRB1*01:19 (120.64), HLA-DRB1*01:18 (95.22), HLA-DRB1*14:17 (196.31), HLA-DRB1*13:20 (175.07) | 28<br>(70.02) |
| <b>YTMSLGA<br/>ENSVAYS<br/>N</b> | HLA-DRB1*01:11 (85.65), HLA-DRB3*03:01 (178.72)                                                                                                                                                                                                                                                                                                                                                                                                                                                                                                                                                                                                                                                                    | 2<br>(77.51)  |

**Table S10:** EPISOPT analyses for the affinity of the potential 9-mer epitopes with MHC class I alleles.

| Peptide Name | Sequence   | HLA I binding profile                                                  |
|--------------|------------|------------------------------------------------------------------------|
| CVS2A1       | FIAGLIAIV  | A0201, A0202, A0203 A0204 A0205 A0206 A0207<br>A0209 A0214 A6802 B3801 |
| CVS2B1       | VTYVPAQEK  | A0301 A1101 A3301 A6801                                                |
| CVS1C1       | CVADYSVLY  | A1101 A6801 B1508 B1517 C0702                                          |
| CVS1B1       | IRGDEVQRQI | B1510 B2706 B39011 C0702                                               |
| CVEnvA1      | YVYSRVKNL  | A0202 A0203 A0206 A0214 B0801 B1517 B4402                              |
| CVS1A1       | TRFASVYAW  | B2701 B2702 B2704 B2705 B2709 B3909 C0702                              |
| CVMemB1      | AVILRGHLR  | A1101 A3101 A3301 A6601 A6801                                          |
| CVMemA1      | WLSYFIASF  | A0203 A6802                                                            |
| CVEnvB1      | VSLVKPSFY  |                                                                        |

**Table S11:** Predivac analyses for the potential 15-mer peptides depending on the interaction with DRB1 alleles eg. 01:01, 03:01, 04:01, 07:01, 08:01, 10:01, 11:01, 12:01, 13:02, 14:01, and 15:01. The antigenicity of the peptides were assessed by Vaxijen v2.0.

| Name    | PEPTIDE              | DRB1*01:01 | DRB1*03:01 | DRB1*04:01 | DRB1*07:01 | DRB1*08:03 | DRB1*10:01 | DRB1*11:01 | DRB1*12:01 | DRB1*13:02 | DRB1*14:01 | DRB1*15:01 | Vaxijen score <sup>a</sup> |
|---------|----------------------|------------|------------|------------|------------|------------|------------|------------|------------|------------|------------|------------|----------------------------|
| CVEnvA2 | KPSFYVYS<br>RVKNLNS  | 82.69      | 59.05      | 86.50      | 78.55      | 80.46      | 85.87      | 81.03      | 59.83      | 86.88      | 71.90      | 84.43      | 0.8229                     |
| CVEnvB2 | NIVNVSLV<br>KPSFYVY  | 66.39      | 63.18      | 66.41      | 71.73      | 59.79      | 69.75      | 63.76      | 85.74      | 69.79      | 64.03      | 60.92      | 0.7680                     |
| CVMemA2 | VGLMWLS<br>YFIASFRL  | 66.37      | 61.72      | 68.58      | 68.70      | 59.46      | 68.18      | 61.27      | 62.12      | 71.85      | 62.50      | 84.42      | 0.6658                     |
| CVMemB2 | VIGAVILR<br>GHLRIAG  | 63.42      | 73.02      | 59.81      | 72.98      | 74.41      | 63.36      | 69.18      | 72.32      | 64.47      | 73.79      | 70.96      | 0.4903                     |
| CVS1A2  | FNATRFAS<br>VYAWNRRK | 81.51      | 51.56      | 71.88      | 80.83      | 64.03      | 81.42      | 70.10      | 61.28      | 75.76      | 55.32      | 79.41      | 0.4491                     |
| CVS1B2  | ADSFVIRG<br>DEVQRQA  | 64.85      | 75.58      | 70.30      | 71.06      | 68.11      | 63.75      | 64.33      | 65.27      | 75.63      | 71.01      | 74.20      | -0.0663                    |
| CVS1C2  | ISNCVADY<br>SVLYNSA  | 72.88      | 75.54      | 71.13      | 76.27      | 79.86      | 77.17      | 63.19      | 67.49      | 67.26      | 71.83      | 89.75      | -0.3853                    |
| CVS2A2  | IWLGFIAI<br>LIAIVMV  | 81.88      | 57.86      | 78.00      | 82.18      | 69.93      | 82.88      | 72.24      | 74.67      | 75.30      | 62.15      | 86.80      | 0.6150                     |
| CVS2B2  | FLHVTYVP<br>AQEKNFT  | 70.02      | 71.79      | 73.43      | 83.14      | 69.54      | 71.69      | 71.63      | 74.21      | 79.13      | 65.08      | 72.82      | 1.1908                     |

<sup>a</sup> The threshold value was set at 4.0. The probable antigen has score more than 4.

**Table S12: Population coverage of the potential peptides of Envelope protein. Here the combined population coverage of MHC class I and MHC class II presented for the World population and different regions of the world.**

| population/area                 | Coverage <sup>a</sup><br>for the peptide<br>CEnvA2 | Coverage <sup>a</sup><br>for the peptide<br>CEnvB2 |
|---------------------------------|----------------------------------------------------|----------------------------------------------------|
| <a href="#">Central Africa</a>  | 90.25%                                             | 73.86%                                             |
| <a href="#">Central America</a> | 80.89%                                             | 34.47%                                             |
| <a href="#">East Africa</a>     | 91.12%                                             | 70.87%                                             |
| <a href="#">East Asia</a>       | 79.96%                                             | 73.04%                                             |
| <a href="#">Europe</a>          | 99.79%                                             | 74.36%                                             |
| <a href="#">North Africa</a>    | 74.18%                                             | 66.36%                                             |
| <a href="#">North America</a>   | 99.95%                                             | 74.86%                                             |
| <a href="#">Northeast Asia</a>  | 99.57%                                             | 60.97%                                             |
| <a href="#">Oceania</a>         | 99.87%                                             | 50.2%                                              |
| <a href="#">South Africa</a>    | 3.15%                                              | 40.9%                                              |
| <a href="#">South America</a>   | 92.17%                                             | 50.08%                                             |
| <a href="#">South Asia</a>      | 98.83%                                             | 79.92%                                             |
| <a href="#">Southeast Asia</a>  | 60.18%                                             | 46.07%                                             |
| <a href="#">Southwest Asia</a>  | 76.01%                                             | 60.17%                                             |
| <a href="#">West Africa</a>     | 93.67%                                             | 86.58%                                             |
| <a href="#">West Indies</a>     | 64.07%                                             | 77.03%                                             |
| <a href="#">World</a>           | 96.77%                                             | 71.88%                                             |
| <b>Average</b>                  | <b>82.38</b>                                       | <b>64.21</b>                                       |
| <b>Standard deviation</b>       | <b>23.36</b>                                       | <b>14.52</b>                                       |

<sup>a</sup> projected population coverage

**Table S13: Population coverage of the potential peptides of membrane glycoprotein. Here the combined population coverage of MHC class I and MHC class II presented for the World population and different regions of the world.**

| population/area                 | Coverage <sup>a</sup><br>for the peptide<br>CVMemA2 | Coverage <sup>a</sup><br>for the peptide<br>CVMemB2 |
|---------------------------------|-----------------------------------------------------|-----------------------------------------------------|
| <a href="#">Central Africa</a>  | 100.0%                                              | 74.36%                                              |
| <a href="#">Central America</a> | 82.23%                                              | 24.06%                                              |
| <a href="#">East Africa</a>     | 100.0%                                              | 80.22%                                              |
| <a href="#">East Asia</a>       | 95.57%                                              | 73.82%                                              |
| <a href="#">Europe</a>          | 100.0%                                              | 87.14%                                              |
| <a href="#">North Africa</a>    | 91.2%                                               | 80.3%                                               |
| <a href="#">North America</a>   | 100.0%                                              | 82.32%                                              |
| <a href="#">Northeast Asia</a>  | 100.0%                                              | 78.44%                                              |
| <a href="#">Oceania</a>         | 100.0%                                              | 71.3%                                               |
| <a href="#">South Africa</a>    | 37.52%                                              | 61.01%                                              |
| <a href="#">South America</a>   | 99.39%                                              | 68.58%                                              |
| <a href="#">South Asia</a>      | 100.0%                                              | 84.64%                                              |
| <a href="#">Southeast Asia</a>  | 90.41%                                              | 70.09%                                              |
| <a href="#">Southwest Asia</a>  | 92.96%                                              | 70.68%                                              |
| <a href="#">West Africa</a>     | 100.0%                                              | 89.08%                                              |
| <a href="#">West Indies</a>     | 86.73%                                              | 66.84%                                              |
| <a href="#">World</a>           | 99.82%                                              | 82.11%                                              |
| <b>Average</b>                  | <b>92.7</b>                                         | <b>73.23</b>                                        |
| <b>Standard deviation</b>       | <b>14.81</b>                                        | <b>14.38</b>                                        |

<sup>a</sup> projected population coverage

**Table S14: Population coverage of the potential peptides of S1 domain of Spike surface glycoprotein. Here the combined population coverage of MHC class I and MHC class II presented for the World population and different regions of the world.**

| population/area                 | Coverage <sup>a</sup><br>for the peptide<br>CVS1A2 | Coverage <sup>a</sup><br>for the peptide<br>CVS1B2 | Coverage <sup>a</sup><br>for the peptide<br>CVS1C2 |
|---------------------------------|----------------------------------------------------|----------------------------------------------------|----------------------------------------------------|
| <a href="#">Central Africa</a>  | 94.36%                                             | 87.59%                                             | 82.11%                                             |
| <a href="#">Central America</a> | 81.77%                                             | 6.46%                                              | 4.99%                                              |
| <a href="#">East Africa</a>     | 95.35%                                             | 84.51%                                             | 80.04%                                             |
| <a href="#">East Asia</a>       | 87.15%                                             | 69.05%                                             | 64.51%                                             |
| <a href="#">Europe</a>          | 97.28%                                             | 85.09%                                             | 76.46%                                             |
| <a href="#">North Africa</a>    | 96.69%                                             | 83.35%                                             | 77.67%                                             |
| <a href="#">North America</a>   | 91.42%                                             | 72.4%                                              | 67.41%                                             |
| <a href="#">Northeast Asia</a>  | 91.21%                                             | 68.11%                                             | 56.89%                                             |
| <a href="#">Oceania</a>         | 88.75%                                             | 62.02%                                             | 52.28%                                             |
| <a href="#">South Africa</a>    | 74.29%                                             | 83.21%                                             | 76.78%                                             |
| <a href="#">South America</a>   | 83.37%                                             | 60.83%                                             | 52.35%                                             |
| <a href="#">South Asia</a>      | 93.98%                                             | 70.06%                                             | 64.37%                                             |
| <a href="#">Southeast Asia</a>  | 86.88%                                             | 69.54%                                             | 57.74%                                             |
| <a href="#">Southwest Asia</a>  | 94.04%                                             | 86.81%                                             | 83.63%                                             |
| <a href="#">West Africa</a>     | 95.16%                                             | 71.02%                                             | 76.71%                                             |
| <a href="#">West Indies</a>     | 91.33%                                             | 56.9%                                              | 68.95%                                             |
| <a href="#">World</a>           | 94.07%                                             | 79.01%                                             | 70.77%                                             |
| <b>Average</b>                  | <b>90.42</b>                                       | <b>70.35</b>                                       | <b>65.51</b>                                       |
| <b>Standard deviation</b>       | <b>5.95</b>                                        | <b>18.52</b>                                       | <b>18.03</b>                                       |

<sup>a</sup> projected population coverage

**Table S15: Population coverage of the potential peptides of S2 domain of Spike surface glycoprotein. Here the combined population coverage of MHC class I and MHC class II presented for the World population and different regions of the world.**

| population/area                 | Coverage <sup>a</sup><br>for the peptide<br>CVS2A2 | Coverage <sup>a</sup><br>for the peptide<br>CVS2B2 |
|---------------------------------|----------------------------------------------------|----------------------------------------------------|
| <a href="#">Central Africa</a>  | 81.28%                                             | 32.61%                                             |
| <a href="#">Central America</a> | 72.66%                                             | 4.04%                                              |
| <a href="#">East Africa</a>     | 88.56%                                             | 33.4%                                              |
| <a href="#">East Asia</a>       | 79.83%                                             | 53.92%                                             |
| <a href="#">Europe</a>          | 88.33%                                             | 62.45%                                             |
| <a href="#">North Africa</a>    | 75.07%                                             | 43.02%                                             |
| <a href="#">North America</a>   | 84.9%                                              | 51.88%                                             |
| <a href="#">Northeast Asia</a>  | 86.62%                                             | 64.37%                                             |
| <a href="#">Oceania</a>         | 89.1%                                              | 57.88%                                             |
| <a href="#">South Africa</a>    | 27.5%                                              | 51.92%                                             |
| <a href="#">South America</a>   | 77.42%                                             | 29.65%                                             |
| <a href="#">South Asia</a>      | 71.37%                                             | 64.12%                                             |
| <a href="#">Southeast Asia</a>  | 46.68%                                             | 51.64%                                             |
| <a href="#">Southwest Asia</a>  | 80.4%                                              | 45.35%                                             |
| <a href="#">West Africa</a>     | 90.88%                                             | 45.56%                                             |
| <a href="#">West Indies</a>     | 64.02%                                             | 32.57%                                             |
| <a href="#">World</a>           | 87.5%                                              | 57.36%                                             |
| <b>Average</b>                  | <b>76.01</b>                                       | <b>45.98</b>                                       |
| <b>Standard deviation</b>       | <b>16.23</b>                                       | <b>15.2</b>                                        |

<sup>a</sup> projected population coverage

**Table S16:** The properties of the final multi-epitope vaccines.

|                                | Vaccine for world (except South Africa) (CVMW)                                                                                                                                                                                                                                                                                                                                                                                                                                                                                                                               | Vaccine for the South Africa (CVMS)                                                                                                                                                                                                                                                                                                                                                                                                                                                                                                                                         |
|--------------------------------|------------------------------------------------------------------------------------------------------------------------------------------------------------------------------------------------------------------------------------------------------------------------------------------------------------------------------------------------------------------------------------------------------------------------------------------------------------------------------------------------------------------------------------------------------------------------------|-----------------------------------------------------------------------------------------------------------------------------------------------------------------------------------------------------------------------------------------------------------------------------------------------------------------------------------------------------------------------------------------------------------------------------------------------------------------------------------------------------------------------------------------------------------------------------|
| Arrangement                    | C- CVMemB2-L*-CEnvA2-L*- CVS1A2-L*-CVS2B2                                                                                                                                                                                                                                                                                                                                                                                                                                                                                                                                    | C- CVMemB2-L*- CVS1A2-L*- CVS2B2-L*-CEnvB2                                                                                                                                                                                                                                                                                                                                                                                                                                                                                                                                  |
| Sequence                       | CVIGAVILRGHLRIAG <b>GPGPG</b> KPSFYVYS<br>RVKNLNS <b>GPGPG</b> FNATRFASVYAWNRK<br><b>GPGPG</b> FLHVTYVPAQEKNFT                                                                                                                                                                                                                                                                                                                                                                                                                                                               | CVIGAVILRGHLRIAG <b>GPGPG</b> FNATRFAS<br>VYAWNRK <b>GPGPG</b> FLHVTYVPAQEKNFT<br><b>GPGPG</b> NIVNVSLVKPSFYVY                                                                                                                                                                                                                                                                                                                                                                                                                                                              |
| Antigenicity                   | Vaxigen Score: <b>0.6839</b>                                                                                                                                                                                                                                                                                                                                                                                                                                                                                                                                                 | Vaxigen Score: <b>0.5563</b>                                                                                                                                                                                                                                                                                                                                                                                                                                                                                                                                                |
| Allergenicity                  | PROBABLE NON-ALLERGEN                                                                                                                                                                                                                                                                                                                                                                                                                                                                                                                                                        | PROBABLE NON-ALLERGEN                                                                                                                                                                                                                                                                                                                                                                                                                                                                                                                                                       |
| Solubility                     | Protein-Sol score: <b>0.698</b>                                                                                                                                                                                                                                                                                                                                                                                                                                                                                                                                              | Protein-Sol score: <b>0.620</b>                                                                                                                                                                                                                                                                                                                                                                                                                                                                                                                                             |
| Secondary structure prediction | <p>SOPMA :</p> <p>Alpha helix (<b>Hh</b>): 11 is 14.47%</p> <p>3<sub>10</sub> helix (<b>Gg</b>): 0 is 0.00%</p> <p>Pi helix (<b>Ii</b>): 0 is 0.00%</p> <p>Beta bridge (<b>Bb</b>): 0 is 0.00%</p> <p>Extended strand(<b>Ee</b>): 17 is 22.37%</p> <p>Beta turn (<b>Tt</b>): 9 is 11.84%</p> <p>Bend region (<b>Ss</b>): 0 is 0.00%</p> <p>Random coil (<b>Cc</b>): 39 is 51.32%</p> <p>Ambiguous states (?): 0 is 0.00%</p> <p>Other states : 0 is 0.00%</p>                                                                                                                | <p>SOPMA :</p> <p>Alpha helix (<b>Hh</b>): 3 is 3.95%</p> <p>3<sub>10</sub> helix (<b>Gg</b>): 0 is 0.00%</p> <p>Pi helix (<b>Ii</b>): 0 is 0.00%</p> <p>Beta bridge (<b>Bb</b>): 0 is 0.00%</p> <p>Extended strand(<b>Ee</b>): 29 is 38.16%</p> <p>Beta turn (<b>Tt</b>): 9 is 11.84%</p> <p>Bend region (<b>Ss</b>): 0 is 0.00%</p> <p>Random coil (<b>Cc</b>): 35 is 46.05%</p> <p>Ambiguous states (?): 0 is 0.00%</p> <p>Other states : 0 is 0.00%</p>                                                                                                                 |
| ProtParam                      | <p><b>Molecular weight:</b> 8117.34</p> <p><b>Theoretical pI:</b> 10.45</p> <p><b>Estimated half-life:</b><br/>The N-terminal of the sequence considered is C (Cys).<br/>The estimated half-life is:<br/>1.2 hours (mammalian reticulocytes, in vitro).<br/>&gt;20 hours (yeast, in vivo).<br/>&gt;10 hours (Escherichia coli, in vivo).</p> <p><b>Instability index:</b><br/>The instability index (II) is computed to be 28.88<br/>This classifies the protein as stable.<br/><b>Aliphatic index:</b> 70.53<br/><b>Grand average of hydropathicity (GRAVY):</b> -0.166</p> | <p><b>Molecular weight:</b> 8057.32</p> <p><b>Theoretical pI:</b> 10.13</p> <p><b>Estimated half-life:</b><br/>The N-terminal of the sequence considered is C (Cys).<br/>The estimated half-life is:<br/>1.2 hours (mammalian reticulocytes, in vitro).<br/>&gt;20 hours (yeast, in vivo).<br/>&gt;10 hours (Escherichia coli, in vivo).</p> <p><b>Instability index:</b><br/>The instability index (II) is computed to be 29.90<br/>This classifies the protein as stable.<br/><b>Aliphatic index:</b> 83.29<br/><b>Grand average of hydropathicity (GRAVY):</b> 0.125</p> |

\***L**= GPGPG Linker

**Table S17:** Linear B-cell epitopes in the multi epitope vaccine.

| CVMW |                   |                |       |
|------|-------------------|----------------|-------|
| Rank | Sequence          | Start position | Score |
| 1    | HLRIAGAAAYFNATRFA | 29             | 0.89  |
| 2    | KAAYFLHVTYVPAQEK  | 52             | 0.83  |
| 3    | CKPSFYVYSRVKLNLS  | 1              | 0.76  |
| 4    | NATRFASVYAWNRKAA  | 39             | 0.75  |
| CVMS |                   |                |       |
| Rank | Sequence          | Start position | Score |
| 1    | HLRIAGAAAYFNATRFA | 29             | 0.89  |
| 2    | KAAYFLHVTYVPAQEK  | 52             | 0.83  |
| 3    | SFYVYAAYVIGAVILR  | 12             | 0.80  |
| 4    | NATRFASVYAWNRKAA  | 39             | 0.75  |
| 5    | NVSLVKPSFYVYAAYV  | 5              | 0.58  |

**Table S18:** Conformational B-cell epitope in the multi epitope vaccine.

| CVMW |              |                    |       |
|------|--------------|--------------------|-------|
| No.  | Peptide      | Number of residues | Score |
| 1    | WNRKA        | 5                  | 0.744 |
| 2    | VPAQEKNFT    | 9                  | 0.653 |
| 3    | NATR         | 4                  | 0.609 |
| CVMS |              |                    |       |
| No.  | Peptide      | Number of residues | Score |
| 1    | YAWNRKA      | 7                  | 0.683 |
| 2    | CNIVNVSLVKPS | 12                 | 0.673 |
| 3    | YVPAQEKNFT   | 10                 | 0.618 |

**Table S19:** The epitopes interacted with different HLAs shown in different supplementary tables. Candidate HLA selected depending upon strong interaction and availability of crystal structure in RCSB. The respective crystal structures downloaded and docking studies performed.

| No. | epitope | HLA                                   | Crystal structures | Reference Tables |
|-----|---------|---------------------------------------|--------------------|------------------|
| 1.  | CVEnvA1 | HLA-A*02:03                           | 3ox8               | Table S1         |
| 2.  | CVEnvA2 | HLA-DRB1*01:01                        | 2FSE               | Table S2         |
| 3.  | CVMemB1 | HLA-A*68:01                           | 6PBH               | Table S3         |
| 4.  | CVMemB2 | HLA-DRB1*01:01                        | 2FSE               | Table S4         |
| 5.  | CVS1A1  | HLA-C*07:02                           | 5VGE               | Table S5         |
| 6.  | CVS1A2  | DQA1/DQB1<br>(candidate of DQ allele) | 1JK8               | Table S6         |
| 7.  | CVS2B1  | HLA-A*11:01                           | 6JP3               | Table S7         |
| 8.  | CVS2B2  | HLA-DRB1*01:01                        | 2FSE               | Table S8         |

**Table S20: Conservancy of the multi-epitopes construct among the new UK variants.**

| <b>Countries included</b> | <b>Number of protein analysis</b> | <b>Conservancy of epitope construct 1</b> | <b>Conservancy of epitope construct 2</b> |
|---------------------------|-----------------------------------|-------------------------------------------|-------------------------------------------|
| England                   | 4,199                             | 100%                                      | 100%                                      |
| Scotland                  | 50                                | 100%                                      | 100%                                      |
| Wales                     | 62                                | 100%                                      | 100%                                      |
| Italy                     | 13                                | 100%                                      | 100%                                      |
| Portugal                  | 19                                | 100%                                      | 100%                                      |
| Denmark                   | 9                                 | 100%                                      | 100%                                      |
| Ireland                   | 7                                 | 100%                                      | 100%                                      |
| Netherland                | 3                                 | 100%                                      | 100%                                      |
| Finland                   | 2                                 | 100%                                      | 100%                                      |
| Norway                    | 2                                 | 100%                                      | 100%                                      |
| Sweden                    | 1                                 | 100%                                      | 100%                                      |
| Spain                     | 1                                 | 100%                                      | 100%                                      |
| France                    | 1                                 | 100%                                      | 100%                                      |
| Canada                    | 2                                 | 100%                                      | 100%                                      |
| Israel                    | 4                                 | 100%                                      | 100%                                      |
| South Korea               | 3                                 | 100%                                      | 100%                                      |
| Japan                     | 5                                 | 100%                                      | 100%                                      |
| Hong Kong                 | 1                                 | 100%                                      | 100%                                      |
| Singapore                 | 1                                 | 100%                                      | 100%                                      |
| Australia                 | 4                                 | 100%                                      | 100%                                      |
| Gibraltar                 | 1                                 | 100%                                      | 100%                                      |
| Total                     | 4,390                             |                                           |                                           |

**Table S21:** Conservancy analyses of the selected 15-mer peptides for CVMW and CVMS using the sequences downloaded from NCBI consisting of mixed strains.

| Name    | Peptide         | Percent of protein sequence matches at identity <= 100% |
|---------|-----------------|---------------------------------------------------------|
| CVEnvA2 | KPSFYVYSRVKNLNS | 96.30% (78/81)                                          |
| CVEnvB2 | NIVNVSLVKPSFYVY | 96.30% (78/81)                                          |
| CVMemB2 | VIGAVILRGHLRIAG | 97.96% (240/245)                                        |
| CVS1A2  | FNATRFASVYAWNRK | 99.30% (993/1000)                                       |
| CVS2B2  | FLHVTYVPAQEKNFT | 99.20% (992/1000)                                       |

**Table S22:** The statistics of the refined docked model of CVMW and TLRs are shown in the table. A lower HADDOCK score represents the strong binding between the Protein and the peptide. The Gibbs free energy in the interactions between CVMW and TLRs calculated by PRODIGY is also shown.

| Parameters                                    | TLR2             | TLR4            | TLR5            |
|-----------------------------------------------|------------------|-----------------|-----------------|
| HADDOCK score                                 | -199.5 +/- 2.3   | -210.6 +/- 6.7  | -214.3 +/- 3.2  |
| Cluster size                                  | 20               | 20              | 20              |
| RMSD from the overall lowest-energy structure | 0.6 +/- 0.4      | 0.6 +/- 0.3     | 0.7 +/- 0.4     |
| Van der Waals energy                          | -88.3 +/- 6.8    | -90.3 +/- 7.3   | -100.9 +/- 4.8  |
| Electrostatic energy                          | -568.6 +/- 42.5  | -675.5 +/- 18.8 | -483.6 +/- 9.7  |
| Desolvation energy                            | 2.5 +/- 4.2      | 14.8 +/- 2.0    | -16.7 +/- 1.1   |
| Restraints violation energy                   | 0.0 +/- 0.0      | 0.0 +/- 0.0     | 0.0 +/- 0.0     |
| Buried Surface Area                           | 3000.1 +/- 116.6 | 2777.2 +/- 15.5 | 3158.8 +/- 63.2 |
| PRODIGY $\Delta G$ (kcal mol <sup>-1</sup> )  | -16.2            | -16.4           | -12.9           |

**Supplementary Material SM1:** The amino acids involved in the interaction between The TLR2 (Atom 1) and Multi-epitope vaccine, CVMW (Atom 2). The Hydrogen Bonds, Salt bridges and non-bonded interactions are mentioned with their distances.

### Hydrogen bonds

|     | <----- A T O M 1 -----> |           |          |         |       |      | <----- A T O M 2 -----> |           |          |         |       |          |
|-----|-------------------------|-----------|----------|---------|-------|------|-------------------------|-----------|----------|---------|-------|----------|
|     | Atom no.                | Atom name | Res name | Res no. | Chain |      | Atom no.                | Atom name | Res name | Res no. | Chain | Distance |
| 1.  | 1894                    | OE1       | GLU      | 225     | A     | <--> | 5879                    | NZ        | LYS      | 56      | B     | 2.60     |
| 2.  | 1956                    | OD1       | ASP      | 231     | A     | <--> | 5512                    | N         | GLY      | 19      | B     | 2.73     |
| 3.  | 2166                    | NZ        | LYS      | 253     | A     | <--> | 5843                    | O         | TRP      | 53      | B     | 2.96     |
| 4.  | 2166                    | NZ        | LYS      | 253     | A     | <--> | 5849                    | OD1       | ASN      | 54      | B     | 2.72     |
| 5.  | 2449                    | OE1       | GLU      | 281     | A     | <--> | 5855                    | N         | ARG      | 55      | B     | 3.29     |
| 6.  | 2450                    | OE2       | GLU      | 281     | A     | <--> | 5864                    | NH1       | ARG      | 55      | B     | 2.66     |
| 7.  | 2788                    | NH1       | ARG      | 316     | A     | <--> | 5488                    | O         | ILE      | 14      | B     | 2.74     |
| 8.  | 2791                    | NH2       | ARG      | 316     | A     | <--> | 5488                    | O         | ILE      | 14      | B     | 2.90     |
| 9.  | 3306                    | OD1       | ASP      | 366     | A     | <--> | 5450                    | NE2       | HIS      | 11      | B     | 2.69     |
| 10. | 3333                    | OE1       | GLU      | 369     | A     | <--> | 5472                    | NH1       | ARG      | 13      | B     | 2.65     |
| 11. | 3598                    | OE1       | GLN      | 396     | A     | <--> | 5472                    | NH1       | ARG      | 13      | B     | 3.01     |
| 12. | 3798                    | OD1       | ASN      | 417     | A     | <--> | 5431                    | NH2       | ARG      | 9       | B     | 2.93     |
| 13. | 4035                    | OH        | TYR      | 440     | A     | <--> | 5428                    | NH1       | ARG      | 9       | B     | 3.10     |
| 14. | 4072                    | OG        | SER      | 444     | A     | <--> | 5625                    | NH2       | ARG      | 30      | B     | 3.08     |
| 15. | 4249                    | OD2       | ASP      | 463     | A     | <--> | 5622                    | NH1       | ARG      | 30      | B     | 2.77     |
| 16. | 4249                    | OD2       | ASP      | 463     | A     | <--> | 5625                    | NH2       | ARG      | 30      | B     | 2.82     |
| 17. | 4426                    | OE1       | GLU      | 481     | A     | <--> | 5645                    | NZ        | LYS      | 32      | B     | 2.69     |

### Non-bonded contacts

| <----- A T O M 1 -----> |          |           |          |         |       | <----- A T O M 2 -----> |          |           |          |         |       |          |
|-------------------------|----------|-----------|----------|---------|-------|-------------------------|----------|-----------|----------|---------|-------|----------|
|                         | Atom no. | Atom name | Res name | Res no. | Chain |                         | Atom no. | Atom name | Res name | Res no. | Chain | Distance |
| 1.                      | 288      | CB        | SER      | 60      | A     | <-->                    | 6028     | CE        | LYS      | 73      | B     | 3.72     |
| 2.                      | 289      | OG        | SER      | 60      | A     | <-->                    | 6028     | CE        | LYS      | 73      | B     | 3.44     |
| 3.                      | 515      | CG2       | VAL      | 82      | A     | <-->                    | 6029     | NZ        | LYS      | 73      | B     | 3.74     |
| 4.                      | 530      | CB        | THR      | 84      | A     | <-->                    | 6027     | CD        | LYS      | 73      | B     | 3.79     |
| 5.                      | 530      | CB        | THR      | 84      | A     | <-->                    | 6028     | CE        | LYS      | 73      | B     | 3.56     |
| 6.                      | 531      | OG1       | THR      | 84      | A     | <-->                    | 6027     | CD        | LYS      | 73      | B     | 3.78     |
| 7.                      | 531      | OG1       | THR      | 84      | A     | <-->                    | 6028     | CE        | LYS      | 73      | B     | 3.30     |
| 8.                      | 531      | OG1       | THR      | 84      | A     | <-->                    | 6029     | NZ        | LYS      | 73      | B     | 3.88     |
| 9.                      | 533      | CG2       | THR      | 84      | A     | <-->                    | 6027     | CD        | LYS      | 73      | B     | 3.75     |
| 10.                     | 747      | OG        | SER      | 108     | A     | <-->                    | 6055     | CZ        | PHE      | 75      | B     | 3.67     |
| 11.                     | 969      | ND2       | ASN      | 130     | A     | <-->                    | 6053     | CE1       | PHE      | 75      | B     | 3.50     |
| 12.                     | 969      | ND2       | ASN      | 130     | A     | <-->                    | 6055     | CZ        | PHE      | 75      | B     | 3.35     |
| 13.                     | 1208     | CD        | ARG      | 155     | A     | <-->                    | 6051     | CD1       | PHE      | 75      | B     | 3.85     |
| 14.                     | 1208     | CD        | ARG      | 155     | A     | <-->                    | 6053     | CE1       | PHE      | 75      | B     | 3.64     |
| 15.                     | 1212     | NH1       | ARG      | 155     | A     | <-->                    | 5360     | CB        | CYS      | 1       | B     | 3.43     |
| 16.                     | 1212     | NH1       | ARG      | 155     | A     | <-->                    | 5361     | SG        | CYS      | 1       | B     | 3.13     |
| 17.                     | 1444     | OE2       | GLU      | 178     | A     | <-->                    | 5361     | SG        | CYS      | 1       | B     | 3.41     |
| 18.                     | 1461     | CD        | GLU      | 180     | A     | <-->                    | 5357     | N         | CYS      | 1       | B     | 3.50     |
| 19.                     | 1462     | OE1       | GLU      | 180     | A     | <-->                    | 5357     | N         | CYS      | 1       | B     | 3.31     |
| 20.                     | 1463     | OE2       | GLU      | 180     | A     | <-->                    | 5357     | N         | CYS      | 1       | B     | 2.93     |
| 21.                     | 1670     | CG        | HIS      | 202     | A     | <-->                    | 5850     | ND2       | ASN      | 54      | B     | 3.64     |
| 22.                     | 1671     | ND1       | HIS      | 202     | A     | <-->                    | 5850     | ND2       | ASN      | 54      | B     | 3.49     |
| 23.                     | 1673     | CD2       | HIS      | 202     | A     | <-->                    | 5850     | ND2       | ASN      | 54      | B     | 3.65     |
| 24.                     | 1674     | CE1       | HIS      | 202     | A     | <-->                    | 5850     | ND2       | ASN      | 54      | B     | 3.43     |

|     |      |     |     |     |   |      |      |     |     |    |   |      |
|-----|------|-----|-----|-----|---|------|------|-----|-----|----|---|------|
| 25. | 1675 | NE2 | HIS | 202 | A | <--> | 5850 | ND2 | ASN | 54 | B | 3.54 |
| 26. | 1693 | CD1 | ILE | 204 | A | <--> | 5361 | SG  | CYS | 1  | B | 3.52 |
| 27. | 1893 | CD  | GLU | 225 | A | <--> | 5879 | NZ  | LYS | 56 | B | 3.47 |
| 28. | 1894 | OE1 | GLU | 225 | A | <--> | 5876 | CG  | LYS | 56 | B | 3.45 |
| 29. | 1894 | OE1 | GLU | 225 | A | <--> | 5877 | CD  | LYS | 56 | B | 3.84 |
| 30. | 1894 | OE1 | GLU | 225 | A | <--> | 5878 | CE  | LYS | 56 | B | 3.64 |
| 31. | 1894 | OE1 | GLU | 225 | A | <--> | 5879 | NZ  | LYS | 56 | B | 2.60 |
| 32. | 1895 | OE2 | GLU | 225 | A | <--> | 5879 | NZ  | LYS | 56 | B | 3.61 |
| 33. | 1901 | CB  | CYS | 226 | A | <--> | 5848 | CG  | ASN | 54 | B | 3.74 |
| 34. | 1902 | SG  | CYS | 226 | A | <--> | 5847 | CB  | ASN | 54 | B | 3.68 |
| 35. | 1921 | OE1 | GLU | 228 | A | <--> | 5825 | CB  | ALA | 52 | B | 3.41 |
| 36. | 1942 | CZ  | ARG | 230 | A | <--> | 5357 | N   | CYS | 1  | B | 3.69 |
| 37. | 1943 | NH1 | ARG | 230 | A | <--> | 5357 | N   | CYS | 1  | B | 3.10 |
| 38. | 1946 | NH2 | ARG | 230 | A | <--> | 5357 | N   | CYS | 1  | B | 3.53 |
| 39. | 1946 | NH2 | ARG | 230 | A | <--> | 5359 | CA  | CYS | 1  | B | 3.77 |
| 40. | 1946 | NH2 | ARG | 230 | A | <--> | 5361 | SG  | CYS | 1  | B | 3.37 |
| 41. | 1955 | CG  | ASP | 231 | A | <--> | 5507 | CB  | PRO | 18 | B | 3.82 |
| 42. | 1956 | OD1 | ASP | 231 | A | <--> | 5506 | CA  | PRO | 18 | B | 3.34 |
| 43. | 1956 | OD1 | ASP | 231 | A | <--> | 5510 | C   | PRO | 18 | B | 3.50 |
| 44. | 1956 | OD1 | ASP | 231 | A | <--> | 5507 | CB  | PRO | 18 | B | 3.23 |
| 45. | 1956 | OD1 | ASP | 231 | A | <--> | 5512 | N   | GLY | 19 | B | 2.73 |
| 46. | 1956 | OD1 | ASP | 231 | A | <--> | 5514 | CA  | GLY | 19 | B | 3.75 |
| 47. | 1957 | OD2 | ASP | 231 | A | <--> | 5507 | CB  | PRO | 18 | B | 3.74 |
| 48. | 2163 | CG  | LYS | 253 | A | <--> | 5849 | OD1 | ASN | 54 | B | 3.59 |
| 49. | 2164 | CD  | LYS | 253 | A | <--> | 5849 | OD1 | ASN | 54 | B | 3.78 |
| 50. | 2165 | CE  | LYS | 253 | A | <--> | 5843 | O   | TRP | 53 | B | 3.06 |
| 51. | 2165 | CE  | LYS | 253 | A | <--> | 5849 | OD1 | ASN | 54 | B | 3.66 |
| 52. | 2166 | NZ  | LYS | 253 | A | <--> | 5842 | C   | TRP | 53 | B | 3.58 |
| 53. | 2166 | NZ  | LYS | 253 | A | <--> | 5843 | O   | TRP | 53 | B | 2.96 |
| 54. | 2166 | NZ  | LYS | 253 | A | <--> | 5848 | CG  | ASN | 54 | B | 3.88 |
| 55. | 2166 | NZ  | LYS | 253 | A | <--> | 5849 | OD1 | ASN | 54 | B | 2.72 |
| 56. | 2188 | OG1 | THR | 255 | A | <--> | 5849 | OD1 | ASN | 54 | B | 3.89 |
| 57. | 2208 | CB  | ARG | 257 | A | <--> | 5504 | O   | GLY | 17 | B | 3.17 |
| 58. | 2209 | CG  | ARG | 257 | A | <--> | 5504 | O   | GLY | 17 | B | 3.80 |
| 59. | 2210 | CD  | ARG | 257 | A | <--> | 5504 | O   | GLY | 17 | B | 3.25 |
| 60. | 2217 | NH2 | ARG | 257 | A | <--> | 5825 | CB  | ALA | 52 | B | 3.74 |
| 61. | 2225 | CB  | ASN | 258 | A | <--> | 5507 | CB  | PRO | 18 | B | 3.74 |
| 62. | 2226 | CG  | ASN | 258 | A | <--> | 5507 | CB  | PRO | 18 | B | 3.89 |
| 63. | 2228 | ND2 | ASN | 258 | A | <--> | 5507 | CB  | PRO | 18 | B | 3.64 |
| 64. | 2447 | CG  | GLU | 281 | A | <--> | 5840 | CZ3 | TRP | 53 | B | 3.57 |
| 65. | 2448 | CD  | GLU | 281 | A | <--> | 5860 | CD  | ARG | 55 | B | 3.61 |
| 66. | 2448 | CD  | GLU | 281 | A | <--> | 5864 | NH1 | ARG | 55 | B | 3.76 |
| 67. | 2449 | OE1 | GLU | 281 | A | <--> | 5855 | N   | ARG | 55 | B | 3.29 |
| 68. | 2449 | OE1 | GLU | 281 | A | <--> | 5857 | CA  | ARG | 55 | B | 3.66 |
| 69. | 2449 | OE1 | GLU | 281 | A | <--> | 5871 | O   | ARG | 55 | B | 3.75 |
| 70. | 2449 | OE1 | GLU | 281 | A | <--> | 5858 | CB  | ARG | 55 | B | 3.14 |
| 71. | 2449 | OE1 | GLU | 281 | A | <--> | 5859 | CG  | ARG | 55 | B | 3.48 |
| 72. | 2449 | OE1 | GLU | 281 | A | <--> | 5860 | CD  | ARG | 55 | B | 3.38 |
| 73. | 2450 | OE2 | GLU | 281 | A | <--> | 5839 | CZ2 | TRP | 53 | B | 3.89 |
| 74. | 2450 | OE2 | GLU | 281 | A | <--> | 5841 | CH2 | TRP | 53 | B | 3.66 |
| 75. | 2450 | OE2 | GLU | 281 | A | <--> | 5860 | CD  | ARG | 55 | B | 3.22 |
| 76. | 2450 | OE2 | GLU | 281 | A | <--> | 5861 | NE  | ARG | 55 | B | 3.89 |
| 77. | 2450 | OE2 | GLU | 281 | A | <--> | 5863 | CZ  | ARG | 55 | B | 3.69 |
| 78. | 2450 | OE2 | GLU | 281 | A | <--> | 5864 | NH1 | ARG | 55 | B | 2.66 |
| 79. | 2468 | OE1 | GLU | 283 | A | <--> | 5828 | N   | TRP | 53 | B | 3.51 |
| 80. | 2468 | OE1 | GLU | 283 | A | <--> | 5830 | CA  | TRP | 53 | B | 3.83 |
| 81. | 2468 | OE1 | GLU | 283 | A | <--> | 5843 | O   | TRP | 53 | B | 3.74 |
| 82. | 2468 | OE1 | GLU | 283 | A | <--> | 5831 | CB  | TRP | 53 | B | 3.38 |
| 83. | 2489 | OD1 | ASP | 285 | A | <--> | 5502 | CA  | GLY | 17 | B | 3.23 |
| 84. | 2490 | OD2 | ASP | 285 | A | <--> | 5485 | CG2 | ILE | 14 | B | 3.36 |

|      |      |     |     |     |   |      |      |     |     |    |   |      |
|------|------|-----|-----|-----|---|------|------|-----|-----|----|---|------|
| 85.  | 2729 | CB  | THR | 311 | A | <--> | 5841 | CH2 | TRP | 53 | B | 3.44 |
| 86.  | 2730 | OG1 | THR | 311 | A | <--> | 5864 | NH1 | ARG | 55 | B | 3.58 |
| 87.  | 2732 | CG2 | THR | 311 | A | <--> | 5839 | CZ2 | TRP | 53 | B | 3.83 |
| 88.  | 2732 | CG2 | THR | 311 | A | <--> | 5841 | CH2 | TRP | 53 | B | 3.61 |
| 89.  | 2732 | CG2 | THR | 311 | A | <--> | 5864 | NH1 | ARG | 55 | B | 3.60 |
| 90.  | 2748 | OG1 | THR | 313 | A | <--> | 5838 | CE3 | TRP | 53 | B | 3.77 |
| 91.  | 2748 | OG1 | THR | 313 | A | <--> | 5840 | CZ3 | TRP | 53 | B | 3.25 |
| 92.  | 2748 | OG1 | THR | 313 | A | <--> | 5841 | CH2 | TRP | 53 | B | 3.45 |
| 93.  | 2750 | CG2 | THR | 313 | A | <--> | 5459 | CD1 | LEU | 12 | B | 3.57 |
| 94.  | 2750 | CG2 | THR | 313 | A | <--> | 5460 | CD2 | LEU | 12 | B | 3.79 |
| 95.  | 2767 | CD  | ARG | 315 | A | <--> | 5462 | O   | LEU | 12 | B | 3.22 |
| 96.  | 2767 | CD  | ARG | 315 | A | <--> | 5485 | CG2 | ILE | 14 | B | 3.80 |
| 97.  | 2768 | NE  | ARG | 315 | A | <--> | 5462 | O   | LEU | 12 | B | 3.05 |
| 98.  | 2768 | NE  | ARG | 315 | A | <--> | 5457 | CB  | LEU | 12 | B | 3.79 |
| 99.  | 2768 | NE  | ARG | 315 | A | <--> | 5459 | CD1 | LEU | 12 | B | 3.43 |
| 100. | 2770 | CZ  | ARG | 315 | A | <--> | 5462 | O   | LEU | 12 | B | 3.82 |
| 101. | 2771 | NH1 | ARG | 315 | A | <--> | 5485 | CG2 | ILE | 14 | B | 3.65 |
| 102. | 2774 | NH2 | ARG | 315 | A | <--> | 5457 | CB  | LEU | 12 | B | 3.71 |
| 103. | 2774 | NH2 | ARG | 315 | A | <--> | 5460 | CD2 | LEU | 12 | B | 3.35 |
| 104. | 2785 | NE  | ARG | 316 | A | <--> | 5499 | O   | GLY | 16 | B | 3.65 |
| 105. | 2787 | CZ  | ARG | 316 | A | <--> | 5488 | O   | ILE | 14 | B | 3.23 |
| 106. | 2787 | CZ  | ARG | 316 | A | <--> | 5499 | O   | GLY | 16 | B | 3.58 |
| 107. | 2788 | NH1 | ARG | 316 | A | <--> | 5488 | O   | ILE | 14 | B | 2.74 |
| 108. | 2791 | NH2 | ARG | 316 | A | <--> | 5488 | O   | ILE | 14 | B | 2.90 |
| 109. | 2791 | NH2 | ARG | 316 | A | <--> | 5485 | CG2 | ILE | 14 | B | 3.76 |
| 110. | 2791 | NH2 | ARG | 316 | A | <--> | 5498 | C   | GLY | 16 | B | 3.83 |
| 111. | 2791 | NH2 | ARG | 316 | A | <--> | 5499 | O   | GLY | 16 | B | 3.59 |
| 112. | 3091 | CD  | GLU | 344 | A | <--> | 5448 | CD2 | HIS | 11 | B | 3.38 |
| 113. | 3092 | OE1 | GLU | 344 | A | <--> | 5444 | CB  | HIS | 11 | B | 3.88 |
| 114. | 3092 | OE1 | GLU | 344 | A | <--> | 5448 | CD2 | HIS | 11 | B | 3.45 |
| 115. | 3092 | OE1 | GLU | 344 | A | <--> | 5463 | N   | ARG | 13 | B | 3.84 |
| 116. | 3092 | OE1 | GLU | 344 | A | <--> | 5465 | CA  | ARG | 13 | B | 3.89 |
| 117. | 3092 | OE1 | GLU | 344 | A | <--> | 5466 | CB  | ARG | 13 | B | 3.73 |
| 118. | 3093 | OE2 | GLU | 344 | A | <--> | 5445 | CG  | HIS | 11 | B | 3.83 |
| 119. | 3093 | OE2 | GLU | 344 | A | <--> | 5448 | CD2 | HIS | 11 | B | 3.34 |
| 120. | 3305 | CG  | ASP | 366 | A | <--> | 5450 | NE2 | HIS | 11 | B | 3.15 |
| 121. | 3306 | OD1 | ASP | 366 | A | <--> | 5448 | CD2 | HIS | 11 | B | 3.58 |
| 122. | 3306 | OD1 | ASP | 366 | A | <--> | 5449 | CE1 | HIS | 11 | B | 3.67 |
| 123. | 3306 | OD1 | ASP | 366 | A | <--> | 5450 | NE2 | HIS | 11 | B | 2.69 |
| 124. | 3307 | OD2 | ASP | 366 | A | <--> | 5449 | CE1 | HIS | 11 | B | 3.72 |
| 125. | 3307 | OD2 | ASP | 366 | A | <--> | 5450 | NE2 | HIS | 11 | B | 2.98 |
| 126. | 3323 | OG  | SER | 368 | A | <--> | 5449 | CE1 | HIS | 11 | B | 3.89 |
| 127. | 3323 | OG  | SER | 368 | A | <--> | 5450 | NE2 | HIS | 11 | B | 3.45 |
| 128. | 3332 | CD  | GLU | 369 | A | <--> | 5472 | NH1 | ARG | 13 | B | 3.50 |
| 129. | 3333 | OE1 | GLU | 369 | A | <--> | 5468 | CD  | ARG | 13 | B | 3.09 |
| 130. | 3333 | OE1 | GLU | 369 | A | <--> | 5469 | NE  | ARG | 13 | B | 3.80 |
| 131. | 3333 | OE1 | GLU | 369 | A | <--> | 5471 | CZ  | ARG | 13 | B | 3.65 |
| 132. | 3333 | OE1 | GLU | 369 | A | <--> | 5472 | NH1 | ARG | 13 | B | 2.65 |
| 133. | 3334 | OE2 | GLU | 369 | A | <--> | 5472 | NH1 | ARG | 13 | B | 3.89 |
| 134. | 3562 | CG2 | ILE | 393 | A | <--> | 5449 | CE1 | HIS | 11 | B | 3.35 |
| 135. | 3562 | CG2 | ILE | 393 | A | <--> | 5450 | NE2 | HIS | 11 | B | 3.79 |
| 136. | 3563 | CD1 | ILE | 393 | A | <--> | 5449 | CE1 | HIS | 11 | B | 3.62 |
| 137. | 3584 | NH1 | ARG | 395 | A | <--> | 5472 | NH1 | ARG | 13 | B | 3.75 |
| 138. | 3587 | NH2 | ARG | 395 | A | <--> | 5468 | CD  | ARG | 13 | B | 3.53 |
| 139. | 3597 | CD  | GLN | 396 | A | <--> | 5472 | NH1 | ARG | 13 | B | 3.86 |
| 140. | 3598 | OE1 | GLN | 396 | A | <--> | 5472 | NH1 | ARG | 13 | B | 3.01 |
| 141. | 3798 | OD1 | ASN | 417 | A | <--> | 5431 | NH2 | ARG | 9  | B | 2.93 |
| 142. | 4034 | CZ  | TYR | 440 | A | <--> | 5428 | NH1 | ARG | 9  | B | 3.66 |
| 143. | 4034 | CZ  | TYR | 440 | A | <--> | 5431 | NH2 | ARG | 9  | B | 3.87 |
| 144. | 4035 | OH  | TYR | 440 | A | <--> | 5428 | NH1 | ARG | 9  | B | 3.10 |

|      |      |     |     |     |   |      |      |     |     |    |   |      |
|------|------|-----|-----|-----|---|------|------|-----|-----|----|---|------|
| 145. | 4054 | ND2 | ASN | 442 | A | <--> | 5622 | NH1 | ARG | 30 | B | 3.23 |
| 146. | 4072 | OG  | SER | 444 | A | <--> | 5625 | NH2 | ARG | 30 | B | 3.08 |
| 147. | 4247 | CG  | ASP | 463 | A | <--> | 5625 | NH2 | ARG | 30 | B | 3.63 |
| 148. | 4248 | OD1 | ASP | 463 | A | <--> | 5625 | NH2 | ARG | 30 | B | 3.74 |
| 149. | 4249 | OD2 | ASP | 463 | A | <--> | 5621 | CZ  | ARG | 30 | B | 3.20 |
| 150. | 4249 | OD2 | ASP | 463 | A | <--> | 5622 | NH1 | ARG | 30 | B | 2.77 |
| 151. | 4249 | OD2 | ASP | 463 | A | <--> | 5625 | NH2 | ARG | 30 | B | 2.82 |
| 152. | 4425 | CD  | GLU | 481 | A | <--> | 5645 | NZ  | LYS | 32 | B | 3.20 |
| 153. | 4426 | OE1 | GLU | 481 | A | <--> | 5643 | CD  | LYS | 32 | B | 3.65 |
| 154. | 4426 | OE1 | GLU | 481 | A | <--> | 5644 | CE  | LYS | 32 | B | 3.44 |
| 155. | 4426 | OE1 | GLU | 481 | A | <--> | 5645 | NZ  | LYS | 32 | B | 2.69 |
| 156. | 4427 | OE2 | GLU | 481 | A | <--> | 5645 | NZ  | LYS | 32 | B | 3.27 |
| 157. | 4449 | OH  | TYR | 483 | A | <--> | 5643 | CD  | LYS | 32 | B | 3.67 |

### Salt bridges

-----

| <----- A T O M 1 -----> |             |              |             |            |       | <----- A T O M 2 -----> |             |              |             |            |       |          |
|-------------------------|-------------|--------------|-------------|------------|-------|-------------------------|-------------|--------------|-------------|------------|-------|----------|
|                         | Atom<br>no. | Atom<br>name | Res<br>name | Res<br>no. | Chain |                         | Atom<br>no. | Atom<br>name | Res<br>name | Res<br>no. | Chain | Distance |
| 1.                      | 1895        | OE2          | GLU         | 225        | A     | <-->                    | 5879        | NZ           | LYS         | 56         | B     | 2.60     |
| 2.                      | 2450        | OE2          | GLU         | 281        | A     | <-->                    | 5864        | NH1          | ARG         | 55         | B     | 2.66     |
| 3.                      | 3092        | OE1          | GLU         | 344        | A     | <-->                    | 5450        | NE2          | HIS         | 11         | B     | 3.93     |
| 4.                      | 3307        | OD2          | ASP         | 366        | A     | <-->                    | 5450        | NE2          | HIS         | 11         | B     | 2.69     |
| 5.                      | 3334        | OE2          | GLU         | 369        | A     | <-->                    | 5472        | NH1          | ARG         | 13         | B     | 2.65     |
| 6.                      | 4249        | OD2          | ASP         | 463        | A     | <-->                    | 5622        | NH1          | ARG         | 30         | B     | 2.77     |
| 7.                      | 4426        | OE1          | GLU         | 481        | A     | <-->                    | 5645        | NZ           | LYS         | 32         | B     | 2.69     |

Number of salt bridges: 7

Number of hydrogen bonds: 17

Number of non-bonded contacts: 157

**Supplementary Material SM2:** The amino acids involved in the interaction between The TLR4 (Atom 1) and Multi-epitope vaccine, CVMW (Atom 2). The Hydrogen Bonds, Salt bridges and non-bonded interactions are mentioned with their distances.

### Hydrogen bonds

| <----- A T O M 1 -----> |          |           |          |         |       |      | <----- A T O M 2 -----> |           |          |         |       |          |
|-------------------------|----------|-----------|----------|---------|-------|------|-------------------------|-----------|----------|---------|-------|----------|
|                         | Atom no. | Atom name | Res name | Res no. | Chain |      | Atom no.                | Atom name | Res name | Res no. | Chain | Distance |
| 1.                      | 326      | OD2       | ASP      | 60      | A     | <--> | 6014                    | NZ        | LYS      | 22      | B     | 2.71     |
| 2.                      | 342      | OG        | SER      | 62      | A     | <--> | 6014                    | NZ        | LYS      | 22      | B     | 2.69     |
| 3.                      | 563      | OD2       | ASP      | 84      | A     | <--> | 6014                    | NZ        | LYS      | 22      | B     | 2.63     |
| 4.                      | 771      | OG1       | THR      | 106     | A     | <--> | 5972                    | O         | ALA      | 15      | B     | 2.70     |
| 5.                      | 977      | NZ        | LYS      | 130     | A     | <--> | 5957                    | O         | ARG      | 13      | B     | 2.89     |
| 6.                      | 977      | NZ        | LYS      | 130     | A     | <--> | 6046                    | O         | PHE      | 25      | B     | 2.95     |
| 7.                      | 1202     | OE2       | GLU      | 154     | A     | <--> | 5953                    | NH2       | ARG      | 13      | B     | 2.71     |
| 8.                      | 1452     | NE2       | HIS      | 179     | A     | <--> | 5940                    | O         | LEU      | 12      | B     | 3.03     |
| 9.                      | 1471     | OD2       | ASP      | 181     | A     | <--> | 5953                    | NH2       | ARG      | 13      | B     | 2.74     |
| 10.                     | 1707     | OD1       | ASN      | 205     | A     | <--> | 5924                    | ND1       | HIS      | 11      | B     | 2.99     |
| 11.                     | 1726     | OG        | SER      | 207     | A     | <--> | 6079                    | OH        | TYR      | 28      | B     | 2.71     |
| 12.                     | 1761     | OG        | SER      | 211     | A     | <--> | 6215                    | ND2       | ASN      | 43      | B     | 2.79     |
| 13.                     | 1944     | O         | HIS      | 229     | A     | <--> | 6103                    | NH2       | ARG      | 30      | B     | 2.85     |
| 14.                     | 1938     | ND1       | HIS      | 229     | A     | <--> | 6079                    | OH        | TYR      | 28      | B     | 3.24     |
| 15.                     | 2493     | OE1       | GLU      | 286     | A     | <--> | 6123                    | NZ        | LYS      | 32      | B     | 2.82     |
| 16.                     | 2504     | OE2       | GLU      | 287     | A     | <--> | 6100                    | NH1       | ARG      | 30      | B     | 3.02     |
| 17.                     | 2745     | OG        | SER      | 311     | A     | <--> | 6123                    | NZ        | LYS      | 32      | B     | 3.07     |
| 18.                     | 3002     | OE1       | GLU      | 336     | A     | <--> | 6168                    | N         | GLY      | 37      | B     | 2.69     |
| 19.                     | 3195     | NH1       | ARG      | 355     | A     | <--> | 6148                    | O         | LEU      | 34      | B     | 2.73     |
| 20.                     | 3198     | NH2       | ARG      | 355     | A     | <--> | 6154                    | OD1       | ASN      | 35      | B     | 3.12     |
| 21.                     | 3216     | OG1       | THR      | 357     | A     | <--> | 6159                    | O         | ASN      | 35      | B     | 3.21     |
| 22.                     | 3418     | OD2       | ASP      | 379     | A     | <--> | 6155                    | ND2       | ASN      | 35      | B     | 3.06     |

### Non-bonded contacts

| <----- A T O M 1 -----> |          |           |          |         |       | <----- A T O M 2 -----> |          |           |          |         |       |          |
|-------------------------|----------|-----------|----------|---------|-------|-------------------------|----------|-----------|----------|---------|-------|----------|
|                         | Atom no. | Atom name | Res name | Res no. | Chain |                         | Atom no. | Atom name | Res name | Res no. | Chain | Distance |
| 1.                      | 46       | CB        | VAL      | 32      | A     | <-->                    | 6001     | O         | PRO      | 20      | B     | 3.86     |
| 2.                      | 47       | CG1       | VAL      | 32      | A     | <-->                    | 6001     | O         | PRO      | 20      | B     | 3.41     |
| 3.                      | 48       | CG2       | VAL      | 32      | A     | <-->                    | 6001     | O         | PRO      | 20      | B     | 3.77     |
| 4.                      | 90       | OG1       | THR      | 37      | A     | <-->                    | 5994     | O         | GLY      | 19      | B     | 3.83     |
| 5.                      | 92       | CG2       | THR      | 37      | A     | <-->                    | 6001     | O         | PRO      | 20      | B     | 3.76     |
| 6.                      | 304      | CG        | ASN      | 58      | A     | <-->                    | 6023     | CG        | PRO      | 23      | B     | 3.87     |
| 7.                      | 305      | OD1       | ASN      | 58      | A     | <-->                    | 6023     | CG        | PRO      | 23      | B     | 3.07     |
| 8.                      | 306      | ND2       | ASN      | 58      | A     | <-->                    | 6023     | CG        | PRO      | 23      | B     | 3.86     |
| 9.                      | 324      | CG        | ASP      | 60      | A     | <-->                    | 6014     | NZ        | LYS      | 22      | B     | 3.18     |
| 10.                     | 325      | OD1       | ASP      | 60      | A     | <-->                    | 6014     | NZ        | LYS      | 22      | B     | 2.93     |
| 11.                     | 326      | OD2       | ASP      | 60      | A     | <-->                    | 6007     | N         | LYS      | 22      | B     | 3.71     |
| 12.                     | 326      | OD2       | ASP      | 60      | A     | <-->                    | 6009     | CA        | LYS      | 22      | B     | 3.79     |
| 13.                     | 326      | OD2       | ASP      | 60      | A     | <-->                    | 6013     | CE        | LYS      | 22      | B     | 3.75     |
| 14.                     | 326      | OD2       | ASP      | 60      | A     | <-->                    | 6014     | NZ        | LYS      | 22      | B     | 2.71     |
| 15.                     | 341      | CB        | SER      | 62      | A     | <-->                    | 6014     | NZ        | LYS      | 22      | B     | 3.76     |
| 16.                     | 342      | OG        | SER      | 62      | A     | <-->                    | 6013     | CE        | LYS      | 22      | B     | 3.46     |
| 17.                     | 342      | OG        | SER      | 62      | A     | <-->                    | 6014     | NZ        | LYS      | 22      | B     | 2.69     |
| 18.                     | 544      | CG1       | VAL      | 82      | A     | <-->                    | 6022     | CB        | PRO      | 23      | B     | 3.46     |
| 19.                     | 544      | CG1       | VAL      | 82      | A     | <-->                    | 6023     | CG        | PRO      | 23      | B     | 3.40     |

|     |      |     |     |     |   |      |      |     |     |    |   |      |
|-----|------|-----|-----|-----|---|------|------|-----|-----|----|---|------|
| 20. | 545  | CG2 | VAL | 82  | A | <--> | 5978 | N   | GLY | 17 | B | 3.80 |
| 21. | 545  | CG2 | VAL | 82  | A | <--> | 5980 | CA  | GLY | 17 | B | 3.48 |
| 22. | 560  | CB  | ASP | 84  | A | <--> | 6024 | CD  | PRO | 23 | B | 3.84 |
| 23. | 561  | CG  | ASP | 84  | A | <--> | 6014 | NZ  | LYS | 22 | B | 3.17 |
| 24. | 562  | OD1 | ASP | 84  | A | <--> | 6014 | NZ  | LYS | 22 | B | 3.54 |
| 25. | 563  | OD2 | ASP | 84  | A | <--> | 6009 | CA  | LYS | 22 | B | 3.38 |
| 26. | 563  | OD2 | ASP | 84  | A | <--> | 6018 | C   | LYS | 22 | B | 3.24 |
| 27. | 563  | OD2 | ASP | 84  | A | <--> | 6019 | O   | LYS | 22 | B | 3.75 |
| 28. | 563  | OD2 | ASP | 84  | A | <--> | 6012 | CD  | LYS | 22 | B | 3.84 |
| 29. | 563  | OD2 | ASP | 84  | A | <--> | 6013 | CE  | LYS | 22 | B | 3.67 |
| 30. | 563  | OD2 | ASP | 84  | A | <--> | 6014 | NZ  | LYS | 22 | B | 2.63 |
| 31. | 563  | OD2 | ASP | 84  | A | <--> | 6020 | N   | PRO | 23 | B | 3.32 |
| 32. | 563  | OD2 | ASP | 84  | A | <--> | 6024 | CD  | PRO | 23 | B | 3.54 |
| 33. | 770  | CB  | THR | 106 | A | <--> | 5972 | O   | ALA | 15 | B | 3.56 |
| 34. | 771  | OG1 | THR | 106 | A | <--> | 5971 | C   | ALA | 15 | B | 3.60 |
| 35. | 771  | OG1 | THR | 106 | A | <--> | 5972 | O   | ALA | 15 | B | 2.70 |
| 36. | 773  | CG2 | THR | 106 | A | <--> | 5972 | O   | ALA | 15 | B | 3.34 |
| 37. | 789  | CG1 | ILE | 108 | A | <--> | 6031 | OG  | SER | 24 | B | 3.65 |
| 38. | 791  | CD1 | ILE | 108 | A | <--> | 6021 | CA  | PRO | 23 | B | 3.53 |
| 39. | 791  | CD1 | ILE | 108 | A | <--> | 6022 | CB  | PRO | 23 | B | 3.85 |
| 40. | 975  | CD  | LYS | 130 | A | <--> | 5972 | O   | ALA | 15 | B | 3.36 |
| 41. | 975  | CD  | LYS | 130 | A | <--> | 5970 | CB  | ALA | 15 | B | 3.75 |
| 42. | 975  | CD  | LYS | 130 | A | <--> | 6034 | O   | SER | 24 | B | 3.57 |
| 43. | 976  | CE  | LYS | 130 | A | <--> | 6034 | O   | SER | 24 | B | 3.22 |
| 44. | 976  | CE  | LYS | 130 | A | <--> | 6046 | O   | PHE | 25 | B | 3.29 |
| 45. | 977  | NZ  | LYS | 130 | A | <--> | 5957 | O   | ARG | 13 | B | 2.89 |
| 46. | 977  | NZ  | LYS | 130 | A | <--> | 5945 | CG  | ARG | 13 | B | 3.88 |
| 47. | 977  | NZ  | LYS | 130 | A | <--> | 6046 | O   | PHE | 25 | B | 2.95 |
| 48. | 995  | CB  | VAL | 132 | A | <--> | 6031 | OG  | SER | 24 | B | 3.88 |
| 49. | 996  | CG1 | VAL | 132 | A | <--> | 6031 | OG  | SER | 24 | B | 3.69 |
| 50. | 997  | CG2 | VAL | 132 | A | <--> | 6030 | CB  | SER | 24 | B | 3.85 |
| 51. | 997  | CG2 | VAL | 132 | A | <--> | 6031 | OG  | SER | 24 | B | 3.41 |
| 52. | 1200 | CD  | GLU | 154 | A | <--> | 5947 | NE  | ARG | 13 | B | 3.20 |
| 53. | 1200 | CD  | GLU | 154 | A | <--> | 5949 | CZ  | ARG | 13 | B | 3.76 |
| 54. | 1200 | CD  | GLU | 154 | A | <--> | 5953 | NH2 | ARG | 13 | B | 3.43 |
| 55. | 1201 | OE1 | GLU | 154 | A | <--> | 5945 | CG  | ARG | 13 | B | 3.30 |
| 56. | 1201 | OE1 | GLU | 154 | A | <--> | 5946 | CD  | ARG | 13 | B | 3.72 |
| 57. | 1201 | OE1 | GLU | 154 | A | <--> | 5947 | NE  | ARG | 13 | B | 3.01 |
| 58. | 1202 | OE2 | GLU | 154 | A | <--> | 5947 | NE  | ARG | 13 | B | 3.10 |
| 59. | 1202 | OE2 | GLU | 154 | A | <--> | 5949 | CZ  | ARG | 13 | B | 3.33 |
| 60. | 1202 | OE2 | GLU | 154 | A | <--> | 5953 | NH2 | ARG | 13 | B | 2.71 |
| 61. | 1202 | OE2 | GLU | 154 | A | <--> | 6052 | CD1 | TYR | 26 | B | 3.70 |
| 62. | 1202 | OE2 | GLU | 154 | A | <--> | 6054 | CE1 | TYR | 26 | B | 3.44 |
| 63. | 1220 | ND2 | ASN | 156 | A | <--> | 5953 | NH2 | ARG | 13 | B | 3.49 |
| 64. | 1220 | ND2 | ASN | 156 | A | <--> | 6054 | CE1 | TYR | 26 | B | 3.67 |
| 65. | 1439 | CD  | GLU | 178 | A | <--> | 5926 | CD2 | HIS | 11 | B | 3.73 |
| 66. | 1439 | CD  | GLU | 178 | A | <--> | 5928 | NE2 | HIS | 11 | B | 3.65 |
| 67. | 1440 | OE1 | GLU | 178 | A | <--> | 5923 | CG  | HIS | 11 | B | 3.38 |
| 68. | 1440 | OE1 | GLU | 178 | A | <--> | 5924 | ND1 | HIS | 11 | B | 3.81 |
| 69. | 1440 | OE1 | GLU | 178 | A | <--> | 5926 | CD2 | HIS | 11 | B | 3.22 |
| 70. | 1440 | OE1 | GLU | 178 | A | <--> | 5928 | NE2 | HIS | 11 | B | 3.59 |
| 71. | 1441 | OE2 | GLU | 178 | A | <--> | 5926 | CD2 | HIS | 11 | B | 3.69 |
| 72. | 1441 | OE2 | GLU | 178 | A | <--> | 5928 | NE2 | HIS | 11 | B | 3.34 |
| 73. | 1449 | ND1 | HIS | 179 | A | <--> | 5946 | CD  | ARG | 13 | B | 3.70 |
| 74. | 1450 | CD2 | HIS | 179 | A | <--> | 5945 | CG  | ARG | 13 | B | 3.77 |
| 75. | 1451 | CE1 | HIS | 179 | A | <--> | 5944 | CB  | ARG | 13 | B | 3.79 |
| 76. | 1451 | CE1 | HIS | 179 | A | <--> | 5945 | CG  | ARG | 13 | B | 3.73 |
| 77. | 1451 | CE1 | HIS | 179 | A | <--> | 5946 | CD  | ARG | 13 | B | 3.80 |
| 78. | 1451 | CE1 | HIS | 179 | A | <--> | 6073 | CG  | TYR | 28 | B | 3.61 |
| 79. | 1451 | CE1 | HIS | 179 | A | <--> | 6074 | CD1 | TYR | 28 | B | 3.55 |

|      |      |     |     |     |   |      |      |     |     |    |   |      |
|------|------|-----|-----|-----|---|------|------|-----|-----|----|---|------|
| 80.  | 1451 | CE1 | HIS | 179 | A | <--> | 6075 | CD2 | TYR | 28 | B | 3.86 |
| 81.  | 1451 | CE1 | HIS | 179 | A | <--> | 6076 | CE1 | TYR | 28 | B | 3.77 |
| 82.  | 1452 | NE2 | HIS | 179 | A | <--> | 5939 | C   | LEU | 12 | B | 3.87 |
| 83.  | 1452 | NE2 | HIS | 179 | A | <--> | 5940 | O   | LEU | 12 | B | 3.03 |
| 84.  | 1452 | NE2 | HIS | 179 | A | <--> | 5943 | CA  | ARG | 13 | B | 3.80 |
| 85.  | 1452 | NE2 | HIS | 179 | A | <--> | 5944 | CB  | ARG | 13 | B | 3.64 |
| 86.  | 1452 | NE2 | HIS | 179 | A | <--> | 5945 | CG  | ARG | 13 | B | 3.62 |
| 87.  | 1468 | CB  | ASP | 181 | A | <--> | 5953 | NH2 | ARG | 13 | B | 3.81 |
| 88.  | 1469 | CG  | ASP | 181 | A | <--> | 5953 | NH2 | ARG | 13 | B | 3.59 |
| 89.  | 1471 | OD2 | ASP | 181 | A | <--> | 5949 | CZ  | ARG | 13 | B | 3.58 |
| 90.  | 1471 | OD2 | ASP | 181 | A | <--> | 5950 | NH1 | ARG | 13 | B | 3.55 |
| 91.  | 1471 | OD2 | ASP | 181 | A | <--> | 5953 | NH2 | ARG | 13 | B | 2.74 |
| 92.  | 1706 | CG  | ASN | 205 | A | <--> | 5924 | ND1 | HIS | 11 | B | 3.41 |
| 93.  | 1706 | CG  | ASN | 205 | A | <--> | 5927 | CE1 | HIS | 11 | B | 3.68 |
| 94.  | 1707 | OD1 | ASN | 205 | A | <--> | 5924 | ND1 | HIS | 11 | B | 2.99 |
| 95.  | 1707 | OD1 | ASN | 205 | A | <--> | 5927 | CE1 | HIS | 11 | B | 3.33 |
| 96.  | 1708 | ND2 | ASN | 205 | A | <--> | 5924 | ND1 | HIS | 11 | B | 3.44 |
| 97.  | 1725 | CB  | SER | 207 | A | <--> | 6079 | OH  | TYR | 28 | B | 3.73 |
| 98.  | 1726 | OG  | SER | 207 | A | <--> | 6076 | CE1 | TYR | 28 | B | 3.67 |
| 99.  | 1726 | OG  | SER | 207 | A | <--> | 6078 | CZ  | TYR | 28 | B | 3.33 |
| 100. | 1726 | OG  | SER | 207 | A | <--> | 6079 | OH  | TYR | 28 | B | 2.71 |
| 101. | 1745 | OD2 | ASP | 209 | A | <--> | 6212 | CB  | ASN | 43 | B | 3.58 |
| 102. | 1760 | CB  | SER | 211 | A | <--> | 6215 | ND2 | ASN | 43 | B | 3.79 |
| 103. | 1761 | OG  | SER | 211 | A | <--> | 6212 | CB  | ASN | 43 | B | 3.45 |
| 104. | 1761 | OG  | SER | 211 | A | <--> | 6213 | CG  | ASN | 43 | B | 3.59 |
| 105. | 1761 | OG  | SER | 211 | A | <--> | 6215 | ND2 | ASN | 43 | B | 2.79 |
| 106. | 1943 | C   | HIS | 229 | A | <--> | 6103 | NH2 | ARG | 30 | B | 3.44 |
| 107. | 1944 | O   | HIS | 229 | A | <--> | 6103 | NH2 | ARG | 30 | B | 2.85 |
| 108. | 1937 | CG  | HIS | 229 | A | <--> | 6103 | NH2 | ARG | 30 | B | 3.62 |
| 109. | 1938 | ND1 | HIS | 229 | A | <--> | 6079 | OH  | TYR | 28 | B | 3.24 |
| 110. | 1938 | ND1 | HIS | 229 | A | <--> | 6097 | NE  | ARG | 30 | B | 3.42 |
| 111. | 1938 | ND1 | HIS | 229 | A | <--> | 6099 | CZ  | ARG | 30 | B | 3.64 |
| 112. | 1938 | ND1 | HIS | 229 | A | <--> | 6103 | NH2 | ARG | 30 | B | 3.29 |
| 113. | 1940 | CE1 | HIS | 229 | A | <--> | 6097 | NE  | ARG | 30 | B | 3.30 |
| 114. | 1940 | CE1 | HIS | 229 | A | <--> | 6099 | CZ  | ARG | 30 | B | 3.74 |
| 115. | 1940 | CE1 | HIS | 229 | A | <--> | 6103 | NH2 | ARG | 30 | B | 3.83 |
| 116. | 1949 | CG  | LYS | 230 | A | <--> | 6191 | O   | PRO | 40 | B | 3.83 |
| 117. | 1950 | CD  | LYS | 230 | A | <--> | 6191 | O   | PRO | 40 | B | 3.43 |
| 118. | 1950 | CD  | LYS | 230 | A | <--> | 6194 | CA  | GLY | 41 | B | 3.59 |
| 119. | 1970 | CB  | THR | 232 | A | <--> | 6215 | ND2 | ASN | 43 | B | 3.79 |
| 120. | 1973 | CG2 | THR | 232 | A | <--> | 6191 | O   | PRO | 40 | B | 3.71 |
| 121. | 1973 | CG2 | THR | 232 | A | <--> | 6213 | CG  | ASN | 43 | B | 3.88 |
| 122. | 1973 | CG2 | THR | 232 | A | <--> | 6215 | ND2 | ASN | 43 | B | 3.74 |
| 123. | 1990 | CD  | ARG | 234 | A | <--> | 6215 | ND2 | ASN | 43 | B | 3.88 |
| 124. | 1994 | NH1 | ARG | 234 | A | <--> | 6219 | O   | ASN | 43 | B | 3.85 |
| 125. | 2200 | CD2 | HIS | 256 | A | <--> | 6100 | NH1 | ARG | 30 | B | 3.30 |
| 126. | 2208 | CB  | ARG | 257 | A | <--> | 6100 | NH1 | ARG | 30 | B | 3.60 |
| 127. | 2208 | CB  | ARG | 257 | A | <--> | 6103 | NH2 | ARG | 30 | B | 3.83 |
| 128. | 2209 | CG  | ARG | 257 | A | <--> | 6191 | O   | PRO | 40 | B | 3.78 |
| 129. | 2211 | NE  | ARG | 257 | A | <--> | 6186 | CA  | PRO | 40 | B | 3.66 |
| 130. | 2214 | NH1 | ARG | 257 | A | <--> | 6177 | CD  | PRO | 38 | B | 3.77 |
| 131. | 2236 | CG2 | VAL | 259 | A | <--> | 6191 | O   | PRO | 40 | B | 3.51 |
| 132. | 2236 | CG2 | VAL | 259 | A | <--> | 6187 | CB  | PRO | 40 | B | 3.89 |
| 133. | 2492 | CD  | GLU | 286 | A | <--> | 6123 | NZ  | LYS | 32 | B | 3.40 |
| 134. | 2493 | OE1 | GLU | 286 | A | <--> | 6122 | CE  | LYS | 32 | B | 3.73 |
| 135. | 2493 | OE1 | GLU | 286 | A | <--> | 6123 | NZ  | LYS | 32 | B | 2.82 |
| 136. | 2494 | OE2 | GLU | 286 | A | <--> | 6123 | NZ  | LYS | 32 | B | 3.86 |
| 137. | 2502 | CD  | GLU | 287 | A | <--> | 6100 | NH1 | ARG | 30 | B | 3.83 |
| 138. | 2504 | OE2 | GLU | 287 | A | <--> | 6100 | NH1 | ARG | 30 | B | 3.02 |
| 139. | 2524 | CD  | ARG | 289 | A | <--> | 6187 | CB  | PRO | 40 | B | 3.82 |

|      |      |     |     |     |   |      |      |     |     |    |   |      |
|------|------|-----|-----|-----|---|------|------|-----|-----|----|---|------|
| 140. | 2745 | OG  | SER | 311 | A | <--> | 6123 | NZ  | LYS | 32 | B | 3.07 |
| 141. | 2753 | OG  | SER | 312 | A | <--> | 6122 | CE  | LYS | 32 | B | 3.29 |
| 142. | 2753 | OG  | SER | 312 | A | <--> | 6123 | NZ  | LYS | 32 | B | 3.24 |
| 143. | 3000 | CG  | GLU | 336 | A | <--> | 6159 | O   | ASN | 35 | B | 3.67 |
| 144. | 3001 | CD  | GLU | 336 | A | <--> | 6162 | CA  | SER | 36 | B | 3.74 |
| 145. | 3001 | CD  | GLU | 336 | A | <--> | 6168 | N   | GLY | 37 | B | 3.32 |
| 146. | 3002 | OE1 | GLU | 336 | A | <--> | 6162 | CA  | SER | 36 | B | 3.63 |
| 147. | 3002 | OE1 | GLU | 336 | A | <--> | 6166 | C   | SER | 36 | B | 3.61 |
| 148. | 3002 | OE1 | GLU | 336 | A | <--> | 6168 | N   | GLY | 37 | B | 2.69 |
| 149. | 3002 | OE1 | GLU | 336 | A | <--> | 6170 | CA  | GLY | 37 | B | 3.53 |
| 150. | 3002 | OE1 | GLU | 336 | A | <--> | 6177 | CD  | PRO | 38 | B | 3.30 |
| 151. | 3003 | OE2 | GLU | 336 | A | <--> | 6168 | N   | GLY | 37 | B | 3.64 |
| 152. | 3019 | CG1 | VAL | 338 | A | <--> | 6163 | CB  | SER | 36 | B | 3.87 |
| 153. | 3019 | CG1 | VAL | 338 | A | <--> | 6164 | OG  | SER | 36 | B | 3.63 |
| 154. | 3194 | CZ  | ARG | 355 | A | <--> | 6148 | O   | LEU | 34 | B | 3.70 |
| 155. | 3195 | NH1 | ARG | 355 | A | <--> | 6128 | O   | LYS | 32 | B | 3.54 |
| 156. | 3195 | NH1 | ARG | 355 | A | <--> | 6147 | C   | LEU | 34 | B | 3.50 |
| 157. | 3195 | NH1 | ARG | 355 | A | <--> | 6148 | O   | LEU | 34 | B | 2.73 |
| 158. | 3198 | NH2 | ARG | 355 | A | <--> | 6138 | C   | ASN | 33 | B | 3.77 |
| 159. | 3198 | NH2 | ARG | 355 | A | <--> | 6139 | O   | ASN | 33 | B | 3.31 |
| 160. | 3198 | NH2 | ARG | 355 | A | <--> | 6147 | C   | LEU | 34 | B | 3.90 |
| 161. | 3198 | NH2 | ARG | 355 | A | <--> | 6148 | O   | LEU | 34 | B | 3.85 |
| 162. | 3198 | NH2 | ARG | 355 | A | <--> | 6154 | OD1 | ASN | 35 | B | 3.12 |
| 163. | 3215 | CB  | THR | 357 | A | <--> | 6159 | O   | ASN | 35 | B | 3.62 |
| 164. | 3216 | OG1 | THR | 357 | A | <--> | 6159 | O   | ASN | 35 | B | 3.21 |
| 165. | 3218 | CG2 | THR | 357 | A | <--> | 6158 | C   | ASN | 35 | B | 3.78 |
| 166. | 3218 | CG2 | THR | 357 | A | <--> | 6159 | O   | ASN | 35 | B | 3.25 |
| 167. | 3218 | CG2 | THR | 357 | A | <--> | 6164 | OG  | SER | 36 | B | 3.65 |
| 168. | 3237 | OG1 | THR | 359 | A | <--> | 6164 | OG  | SER | 36 | B | 3.49 |
| 169. | 3400 | CZ  | PHE | 377 | A | <--> | 6153 | CG  | ASN | 35 | B | 3.71 |
| 170. | 3400 | CZ  | PHE | 377 | A | <--> | 6154 | OD1 | ASN | 35 | B | 3.57 |
| 171. | 3400 | CZ  | PHE | 377 | A | <--> | 6155 | ND2 | ASN | 35 | B | 3.35 |
| 172. | 3416 | CG  | ASP | 379 | A | <--> | 6155 | ND2 | ASN | 35 | B | 3.70 |
| 173. | 3418 | OD2 | ASP | 379 | A | <--> | 6155 | ND2 | ASN | 35 | B | 3.06 |

# Salt bridges

-----

| <----- A T O M 1 -----> |          |           |          |         |       | <----- A T O M 2 -----> |          |           |          |         |       |          |
|-------------------------|----------|-----------|----------|---------|-------|-------------------------|----------|-----------|----------|---------|-------|----------|
|                         | Atom no. | Atom name | Res name | Res no. | Chain |                         | Atom no. | Atom name | Res name | Res no. | Chain | Distance |
| 1.                      | 326      | OD2       | ASP      | 60      | A     | <-->                    | 6014     | NZ        | LYS      | 22      | B     | 2.71     |
| 2.                      | 563      | OD2       | ASP      | 84      | A     | <-->                    | 6014     | NZ        | LYS      | 22      | B     | 2.63     |
| 3.                      | 1202     | OE2       | GLU      | 154     | A     | <-->                    | 5953     | NH2       | ARG      | 13      | B     | 2.71     |
| 4.                      | 1441     | OE2       | GLU      | 178     | A     | <-->                    | 5928     | NE2       | HIS      | 11      | B     | 3.34     |
| 5.                      | 1471     | OD2       | ASP      | 181     | A     | <-->                    | 5953     | NH2       | ARG      | 13      | B     | 2.74     |
| 6.                      | 2493     | OE1       | GLU      | 286     | A     | <-->                    | 6123     | NZ        | LYS      | 32      | B     | 2.82     |
| 7.                      | 2503     | OE1       | GLU      | 287     | A     | <-->                    | 6100     | NH1       | ARG      | 30      | B     | 3.02     |

Number of salt bridges: 7

Number of hydrogen bonds: 22

Number of non-bonded contacts: 173

**Supplementary Material SM3:** The amino acids involved in the interaction between The TLR5 (Atom 1) and Multi-epitope vaccine, CVMW (Atom 2). The Hydrogen Bonds, Salt bridges and non-bonded interactions are mentioned with their distances.

#### Hydrogen bonds

| <----- A T O M 1 -----> |          |           |          |         |       |      | <----- A T O M 2 -----> |           |          |         |       |          |
|-------------------------|----------|-----------|----------|---------|-------|------|-------------------------|-----------|----------|---------|-------|----------|
|                         | Atom no. | Atom name | Res name | Res no. | Chain |      | Atom no.                | Atom name | Res name | Res no. | Chain | Distance |
| 1.                      | 266      | OE1       | GLU      | 49      | A     | <--> | 8188                    | N         | GLY      | 39      | B     | 2.92     |
| 2.                      | 758      | NH1       | ARG      | 98      | A     | <--> | 8472                    | O         | VAL      | 68      | B     | 3.12     |
| 3.                      | 1003     | OE1       | GLU      | 123     | A     | <--> | 8234                    | N         | THR      | 45      | B     | 2.84     |
| 4.                      | 1003     | OE1       | GLU      | 123     | A     | <--> | 8238                    | OG1       | THR      | 45      | B     | 2.75     |
| 5.                      | 1512     | NZ        | LYS      | 173     | A     | <--> | 8497                    | O         | GLN      | 71      | B     | 2.80     |
| 6.                      | 1522     | OG        | SER      | 174     | A     | <--> | 8493                    | NE2       | GLN      | 71      | B     | 2.83     |
| 7.                      | 2896     | OD1       | ASN      | 318     | A     | <--> | 8022                    | NZ        | LYS      | 22      | B     | 2.83     |
| 8.                      | 3150     | OG        | SER      | 344     | A     | <--> | 8022                    | NZ        | LYS      | 22      | B     | 2.90     |
| 9.                      | 3365     | OD2       | ASP      | 366     | A     | <--> | 8022                    | NZ        | LYS      | 22      | B     | 2.67     |
| 10.                     | 6412     | OE1       | GLN      | 708     | A     | <--> | 8430                    | NE2       | HIS      | 64      | B     | 3.00     |
| 11.                     | 6460     | NZ        | LYS      | 713     | A     | <--> | 8411                    | O         | PHE      | 62      | B     | 2.85     |
| 12.                     | 6495     | O         | ASP      | 716     | A     | <--> | 8131                    | NZ        | LYS      | 32      | B     | 2.95     |
| 13.                     | 6492     | OD1       | ASP      | 716     | A     | <--> | 8131                    | NZ        | LYS      | 32      | B     | 2.61     |
| 14.                     | 6493     | OD2       | ASP      | 716     | A     | <--> | 8143                    | ND2       | ASN      | 33      | B     | 2.72     |
| 15.                     | 6599     | O         | PHE      | 725     | A     | <--> | 8131                    | NZ        | LYS      | 32      | B     | 2.80     |

#### Non-bonded contacts

| <----- A T O M 1 -----> |          |           |          |         |       |      | <----- A T O M 2 -----> |           |          |         |       |          |
|-------------------------|----------|-----------|----------|---------|-------|------|-------------------------|-----------|----------|---------|-------|----------|
|                         | Atom no. | Atom name | Res name | Res no. | Chain |      | Atom no.                | Atom name | Res name | Res no. | Chain | Distance |
| 1.                      | 56       | CD        | ARG      | 29      | A     | <--> | 8196                    | CG        | PRO      | 40      | B     | 3.87     |
| 2.                      | 57       | NE        | ARG      | 29      | A     | <--> | 8196                    | CG        | PRO      | 40      | B     | 3.37     |
| 3.                      | 57       | NE        | ARG      | 29      | A     | <--> | 8197                    | CD        | PRO      | 40      | B     | 3.77     |
| 4.                      | 59       | CZ        | ARG      | 29      | A     | <--> | 8196                    | CG        | PRO      | 40      | B     | 3.58     |
| 5.                      | 63       | NH2       | ARG      | 29      | A     | <--> | 8183                    | CB        | PRO      | 38      | B     | 3.39     |
| 6.                      | 63       | NH2       | ARG      | 29      | A     | <--> | 8196                    | CG        | PRO      | 40      | B     | 3.86     |
| 7.                      | 63       | NH2       | ARG      | 29      | A     | <--> | 8197                    | CD        | PRO      | 40      | B     | 3.75     |
| 8.                      | 266      | OE1       | GLU      | 49      | A     | <--> | 8186                    | C         | PRO      | 38      | B     | 3.88     |
| 9.                      | 266      | OE1       | GLU      | 49      | A     | <--> | 8183                    | CB        | PRO      | 38      | B     | 3.29     |
| 10.                     | 266      | OE1       | GLU      | 49      | A     | <--> | 8184                    | CG        | PRO      | 38      | B     | 3.25     |
| 11.                     | 266      | OE1       | GLU      | 49      | A     | <--> | 8185                    | CD        | PRO      | 38      | B     | 3.20     |
| 12.                     | 266      | OE1       | GLU      | 49      | A     | <--> | 8188                    | N         | GLY      | 39      | B     | 2.92     |
| 13.                     | 266      | OE1       | GLU      | 49      | A     | <--> | 8190                    | CA        | GLY      | 39      | B     | 3.70     |
| 14.                     | 266      | OE1       | GLU      | 49      | A     | <--> | 8197                    | CD        | PRO      | 40      | B     | 3.81     |
| 15.                     | 267      | OE2       | GLU      | 49      | A     | <--> | 8197                    | CD        | PRO      | 40      | B     | 3.72     |
| 16.                     | 276      | NE        | ARG      | 50      | A     | <--> | 8197                    | CD        | PRO      | 40      | B     | 3.61     |
| 17.                     | 282      | NH2       | ARG      | 50      | A     | <--> | 8188                    | N         | GLY      | 39      | B     | 3.56     |
| 18.                     | 282      | NH2       | ARG      | 50      | A     | <--> | 8190                    | CA        | GLY      | 39      | B     | 3.40     |
| 19.                     | 511      | NE2       | GLN      | 73      | A     | <--> | 8178                    | CA        | GLY      | 37      | B     | 3.52     |
| 20.                     | 511      | NE2       | GLN      | 73      | A     | <--> | 8185                    | CD        | PRO      | 38      | B     | 3.68     |
| 21.                     | 758      | NH1       | ARG      | 98      | A     | <--> | 8472                    | O         | VAL      | 68      | B     | 3.12     |
| 22.                     | 758      | NH1       | ARG      | 98      | A     | <--> | 8469                    | CG1       | VAL      | 68      | B     | 3.45     |
| 23.                     | 770      | CG1       | ILE      | 99      | A     | <--> | 8231                    | CB        | ALA      | 44      | B     | 3.73     |
| 24.                     | 771      | CG2       | ILE      | 99      | A     | <--> | 8227                    | O         | ASN      | 43      | B     | 3.68     |
| 25.                     | 772      | CD1       | ILE      | 99      | A     | <--> | 8231                    | CB        | ALA      | 44      | B     | 3.77     |
| 26.                     | 993      | CE2       | PHE      | 122     | A     | <--> | 8478                    | C         | PRO      | 69      | B     | 3.64     |
| 27.                     | 993      | CE2       | PHE      | 122     | A     | <--> | 8479                    | O         | PRO      | 69      | B     | 3.50     |

|     |      |     |     |     |   |      |      |     |     |    |   |      |
|-----|------|-----|-----|-----|---|------|------|-----|-----|----|---|------|
| 28. | 1002 | CD  | GLU | 123 | A | <--> | 8234 | N   | THR | 45 | B | 3.80 |
| 29. | 1003 | OE1 | GLU | 123 | A | <--> | 8230 | CA  | ALA | 44 | B | 3.65 |
| 30. | 1003 | OE1 | GLU | 123 | A | <--> | 8232 | C   | ALA | 44 | B | 3.47 |
| 31. | 1003 | OE1 | GLU | 123 | A | <--> | 8231 | CB  | ALA | 44 | B | 3.85 |
| 32. | 1003 | OE1 | GLU | 123 | A | <--> | 8234 | N   | THR | 45 | B | 2.84 |
| 33. | 1003 | OE1 | GLU | 123 | A | <--> | 8236 | CA  | THR | 45 | B | 3.55 |
| 34. | 1003 | OE1 | GLU | 123 | A | <--> | 8237 | CB  | THR | 45 | B | 3.57 |
| 35. | 1003 | OE1 | GLU | 123 | A | <--> | 8238 | OG1 | THR | 45 | B | 2.75 |
| 36. | 1004 | OE2 | GLU | 123 | A | <--> | 8230 | CA  | ALA | 44 | B | 3.87 |
| 37. | 1254 | CG2 | THR | 148 | A | <--> | 8490 | CG  | GLN | 71 | B | 3.67 |
| 38. | 1508 | CB  | LYS | 173 | A | <--> | 8493 | NE2 | GLN | 71 | B | 3.68 |
| 39. | 1510 | CD  | LYS | 173 | A | <--> | 8497 | O   | GLN | 71 | B | 3.79 |
| 40. | 1510 | CD  | LYS | 173 | A | <--> | 8490 | CG  | GLN | 71 | B | 3.89 |
| 41. | 1511 | CE  | LYS | 173 | A | <--> | 8497 | O   | GLN | 71 | B | 3.65 |
| 42. | 1512 | NZ  | LYS | 173 | A | <--> | 8497 | O   | GLN | 71 | B | 2.80 |
| 43. | 1522 | OG  | SER | 174 | A | <--> | 8491 | CD  | GLN | 71 | B | 3.89 |
| 44. | 1522 | OG  | SER | 174 | A | <--> | 8493 | NE2 | GLN | 71 | B | 2.83 |
| 45. | 2896 | OD1 | ASN | 318 | A | <--> | 8021 | CE  | LYS | 22 | B | 3.62 |
| 46. | 2896 | OD1 | ASN | 318 | A | <--> | 8022 | NZ  | LYS | 22 | B | 2.83 |
| 47. | 3129 | CB  | ASN | 342 | A | <--> | 8022 | NZ  | LYS | 22 | B | 3.40 |
| 48. | 3130 | CG  | ASN | 342 | A | <--> | 8022 | NZ  | LYS | 22 | B | 3.58 |
| 49. | 3131 | OD1 | ASN | 342 | A | <--> | 8021 | CE  | LYS | 22 | B | 3.51 |
| 50. | 3131 | OD1 | ASN | 342 | A | <--> | 8022 | NZ  | LYS | 22 | B | 3.24 |
| 51. | 3150 | OG  | SER | 344 | A | <--> | 8022 | NZ  | LYS | 22 | B | 2.90 |
| 52. | 3344 | CE2 | TYR | 364 | A | <--> | 8012 | CA  | GLY | 21 | B | 3.75 |
| 53. | 3346 | OH  | TYR | 364 | A | <--> | 8012 | CA  | GLY | 21 | B | 3.78 |
| 54. | 3363 | CG  | ASP | 366 | A | <--> | 8022 | NZ  | LYS | 22 | B | 3.61 |
| 55. | 3365 | OD2 | ASP | 366 | A | <--> | 8020 | CD  | LYS | 22 | B | 3.71 |
| 56. | 3365 | OD2 | ASP | 366 | A | <--> | 8021 | CE  | LYS | 22 | B | 3.44 |
| 57. | 3365 | OD2 | ASP | 366 | A | <--> | 8022 | NZ  | LYS | 22 | B | 2.67 |
| 58. | 3384 | NE2 | GLN | 368 | A | <--> | 8019 | CG  | LYS | 22 | B | 3.76 |
| 59. | 3594 | OG1 | THR | 388 | A | <--> | 7994 | CG  | PRO | 18 | B | 3.48 |
| 60. | 3794 | CE1 | PHE | 409 | A | <--> | 7995 | CD  | PRO | 18 | B | 3.65 |
| 61. | 3796 | CZ  | PHE | 409 | A | <--> | 7995 | CD  | PRO | 18 | B | 3.70 |
| 62. | 6381 | O   | THR | 705 | A | <--> | 8406 | CD2 | PHE | 62 | B | 3.54 |
| 63. | 6381 | O   | THR | 705 | A | <--> | 8408 | CE2 | PHE | 62 | B | 3.24 |
| 64. | 6417 | O   | GLN | 708 | A | <--> | 8428 | CD2 | HIS | 64 | B | 3.85 |
| 65. | 6412 | OE1 | GLN | 708 | A | <--> | 8428 | CD2 | HIS | 64 | B | 3.67 |
| 66. | 6412 | OE1 | GLN | 708 | A | <--> | 8429 | CE1 | HIS | 64 | B | 3.79 |
| 67. | 6412 | OE1 | GLN | 708 | A | <--> | 8430 | NE2 | HIS | 64 | B | 3.00 |
| 68. | 6427 | C   | ASN | 709 | A | <--> | 8399 | O   | GLY | 61 | B | 3.81 |
| 69. | 6428 | O   | ASN | 709 | A | <--> | 8399 | O   | GLY | 61 | B | 3.46 |
| 70. | 6421 | CB  | ASN | 709 | A | <--> | 8402 | CA  | PHE | 62 | B | 3.86 |
| 71. | 6421 | CB  | ASN | 709 | A | <--> | 8406 | CD2 | PHE | 62 | B | 3.43 |
| 72. | 6422 | CG  | ASN | 709 | A | <--> | 8433 | O   | HIS | 64 | B | 3.34 |
| 73. | 6422 | CG  | ASN | 709 | A | <--> | 8424 | CB  | HIS | 64 | B | 3.73 |
| 74. | 6423 | OD1 | ASN | 709 | A | <--> | 8432 | C   | HIS | 64 | B | 3.86 |
| 75. | 6423 | OD1 | ASN | 709 | A | <--> | 8433 | O   | HIS | 64 | B | 2.93 |
| 76. | 6423 | OD1 | ASN | 709 | A | <--> | 8424 | CB  | HIS | 64 | B | 3.26 |
| 77. | 6423 | OD1 | ASN | 709 | A | <--> | 8425 | CG  | HIS | 64 | B | 3.48 |
| 78. | 6423 | OD1 | ASN | 709 | A | <--> | 8428 | CD2 | HIS | 64 | B | 3.21 |
| 79. | 6424 | ND2 | ASN | 709 | A | <--> | 8406 | CD2 | PHE | 62 | B | 3.73 |
| 80. | 6424 | ND2 | ASN | 709 | A | <--> | 8433 | O   | HIS | 64 | B | 3.44 |
| 81. | 6429 | N   | ALA | 710 | A | <--> | 8399 | O   | GLY | 61 | B | 3.74 |
| 82. | 6429 | N   | ALA | 710 | A | <--> | 8402 | CA  | PHE | 62 | B | 3.81 |
| 83. | 6431 | CA  | ALA | 710 | A | <--> | 8398 | C   | GLY | 61 | B | 3.61 |
| 84. | 6431 | CA  | ALA | 710 | A | <--> | 8399 | O   | GLY | 61 | B | 3.18 |
| 85. | 6433 | C   | ALA | 710 | A | <--> | 8399 | O   | GLY | 61 | B | 3.78 |
| 86. | 6434 | O   | ALA | 710 | A | <--> | 8395 | N   | GLY | 61 | B | 3.79 |
| 87. | 6434 | O   | ALA | 710 | A | <--> | 8399 | O   | GLY | 61 | B | 3.52 |

|      |      |     |     |     |   |      |      |     |     |    |   |      |
|------|------|-----|-----|-----|---|------|------|-----|-----|----|---|------|
| 88.  | 6432 | CB  | ALA | 710 | A | <--> | 8405 | CD1 | PHE | 62 | B | 3.85 |
| 89.  | 6432 | CB  | ALA | 710 | A | <--> | 8407 | CE1 | PHE | 62 | B | 3.73 |
| 90.  | 6450 | CD2 | LEU | 712 | A | <--> | 8140 | CB  | ASN | 33 | B | 3.79 |
| 91.  | 6456 | CB  | LYS | 713 | A | <--> | 8399 | O   | GLY | 61 | B | 3.32 |
| 92.  | 6456 | CB  | LYS | 713 | A | <--> | 8411 | O   | PHE | 62 | B | 3.77 |
| 93.  | 6457 | CG  | LYS | 713 | A | <--> | 8411 | O   | PHE | 62 | B | 3.21 |
| 94.  | 6458 | CD  | LYS | 713 | A | <--> | 8142 | OD1 | ASN | 33 | B | 3.69 |
| 95.  | 6459 | CE  | LYS | 713 | A | <--> | 7895 | O   | ILE | 7  | B | 3.88 |
| 96.  | 6459 | CE  | LYS | 713 | A | <--> | 7904 | O   | LEU | 8  | B | 3.75 |
| 97.  | 6459 | CE  | LYS | 713 | A | <--> | 8411 | O   | PHE | 62 | B | 3.54 |
| 98.  | 6459 | CE  | LYS | 713 | A | <--> | 8420 | O   | LEU | 63 | B | 3.31 |
| 99.  | 6460 | NZ  | LYS | 713 | A | <--> | 8411 | O   | PHE | 62 | B | 2.85 |
| 100. | 6460 | NZ  | LYS | 713 | A | <--> | 8420 | O   | LEU | 63 | B | 3.72 |
| 101. | 6460 | NZ  | LYS | 713 | A | <--> | 8415 | CB  | LEU | 63 | B | 3.51 |
| 102. | 6473 | CE1 | HIS | 714 | A | <--> | 8388 | N   | PRO | 60 | B | 3.89 |
| 103. | 6494 | C   | ASP | 716 | A | <--> | 8131 | NZ  | LYS | 32 | B | 3.85 |
| 104. | 6495 | O   | ASP | 716 | A | <--> | 8131 | NZ  | LYS | 32 | B | 2.95 |
| 105. | 6490 | CB  | ASP | 716 | A | <--> | 8143 | ND2 | ASN | 33 | B | 3.83 |
| 106. | 6491 | CG  | ASP | 716 | A | <--> | 8131 | NZ  | LYS | 32 | B | 3.15 |
| 107. | 6491 | CG  | ASP | 716 | A | <--> | 8140 | CB  | ASN | 33 | B | 3.69 |
| 108. | 6491 | CG  | ASP | 716 | A | <--> | 8143 | ND2 | ASN | 33 | B | 3.51 |
| 109. | 6492 | OD1 | ASP | 716 | A | <--> | 8128 | CG  | LYS | 32 | B | 3.83 |
| 110. | 6492 | OD1 | ASP | 716 | A | <--> | 8130 | CE  | LYS | 32 | B | 3.67 |
| 111. | 6492 | OD1 | ASP | 716 | A | <--> | 8131 | NZ  | LYS | 32 | B | 2.61 |
| 112. | 6493 | OD2 | ASP | 716 | A | <--> | 8135 | C   | LYS | 32 | B | 3.85 |
| 113. | 6493 | OD2 | ASP | 716 | A | <--> | 8127 | CB  | LYS | 32 | B | 3.38 |
| 114. | 6493 | OD2 | ASP | 716 | A | <--> | 8128 | CG  | LYS | 32 | B | 3.53 |
| 115. | 6493 | OD2 | ASP | 716 | A | <--> | 8131 | NZ  | LYS | 32 | B | 3.52 |
| 116. | 6493 | OD2 | ASP | 716 | A | <--> | 8137 | N   | ASN | 33 | B | 3.16 |
| 117. | 6493 | OD2 | ASP | 716 | A | <--> | 8139 | CA  | ASN | 33 | B | 3.69 |
| 118. | 6493 | OD2 | ASP | 716 | A | <--> | 8140 | CB  | ASN | 33 | B | 3.39 |
| 119. | 6493 | OD2 | ASP | 716 | A | <--> | 8141 | CG  | ASN | 33 | B | 3.52 |
| 120. | 6493 | OD2 | ASP | 716 | A | <--> | 8143 | ND2 | ASN | 33 | B | 2.72 |
| 121. | 6502 | CG2 | THR | 717 | A | <--> | 7910 | CD  | ARG | 9  | B | 3.72 |
| 122. | 6533 | CA  | SER | 720 | A | <--> | 8129 | CD  | LYS | 32 | B | 3.52 |
| 123. | 6538 | O   | SER | 720 | A | <--> | 8129 | CD  | LYS | 32 | B | 3.61 |
| 124. | 6534 | CB  | SER | 720 | A | <--> | 8129 | CD  | LYS | 32 | B | 3.72 |
| 125. | 6565 | OD1 | ASN | 723 | A | <--> | 8130 | CE  | LYS | 32 | B | 3.88 |
| 126. | 6599 | O   | PHE | 725 | A | <--> | 8130 | CE  | LYS | 32 | B | 3.37 |
| 127. | 6599 | O   | PHE | 725 | A | <--> | 8131 | NZ  | LYS | 32 | B | 2.80 |
| 128. | 6664 | CG  | ARG | 732 | A | <--> | 8161 | CG  | ASN | 35 | B | 3.69 |
| 129. | 6664 | CG  | ARG | 732 | A | <--> | 8162 | OD1 | ASN | 35 | B | 3.59 |
| 130. | 6664 | CG  | ARG | 732 | A | <--> | 8163 | ND2 | ASN | 35 | B | 3.63 |
| 131. | 7583 | CD1 | PHE | 822 | A | <--> | 8380 | CD  | PRO | 58 | B | 3.86 |

# Salt bridges

| <----- A T O M 1 -----> |          |           |          |         |       | <----- A T O M 2 -----> |          |           |          |         |       |          |
|-------------------------|----------|-----------|----------|---------|-------|-------------------------|----------|-----------|----------|---------|-------|----------|
|                         | Atom no. | Atom name | Res name | Res no. | Chain |                         | Atom no. | Atom name | Res name | Res no. | Chain | Distance |
| 1.                      | 3364     | OD1       | ASP      | 366     | A     | <-->                    | 8022     | NZ        | LYS      | 22      | B     | 2.67     |
| 2.                      | 6492     | OD1       | ASP      | 716     | A     | <-->                    | 8131     | NZ        | LYS      | 32      | B     | 2.61     |

Number of salt bridges: 2

Number of hydrogen bonds: 15

Number of non-bonded contacts: 131
